# Supplementary material
Source: PubMed Central journal article supplement (PMC10575658)
Supplement: Appendix_1_Conflict_of_Interest.pdf [file Appendix_1_Conflict_of_Interest.pdf]

---

# APPENDIX 1

---

## TABLE OF CONTENTS

|                                                        |    |
|--------------------------------------------------------|----|
| APPENDIX 1A: CONFLICT OF INTEREST DECLARATIONS .....   | 2  |
| APPENDIX 1B: STRENGTH OF RECOMMENDATIONS SUMMARY ..... | 14 |
| APPENDIX 1C: UPDATED RECOMMENDATIONS MATRIX .....      | 15 |
| APPENDIX 1D: SUPPLEMENTAL QUESTIONS.....               | 23 |

## **APPENDIX 1A: CONFLICT OF INTEREST DECLARATIONS**

In the spirit of transparency, participants reported any related activities - including expenses and/or honorariums for presentations for not-for profit organizations. No panel or scientific committee member has had a pharmaceutical industry related conflict in the past 3 years.

| <b>Name</b>                      | <b>Affiliation</b>                                                                                 | <b>Direct financial relationships</b>                      | <b>Advisory board or speaker's bureau</b> | <b>Funded grants, research, or clinical trials</b>                                                                  | <b>Patents for a drug or device</b> | <b>Other investments or relationships</b> | <b>Written related articles</b>                                | <b>Presented on related topics</b> | <b>Apps, software, tools, etc.</b> |
|----------------------------------|----------------------------------------------------------------------------------------------------|------------------------------------------------------------|-------------------------------------------|---------------------------------------------------------------------------------------------------------------------|-------------------------------------|-------------------------------------------|----------------------------------------------------------------|------------------------------------|------------------------------------|
| <b>GUIDELINE PANEL</b>           |                                                                                                    |                                                            |                                           |                                                                                                                     |                                     |                                           |                                                                |                                    |                                    |
| <b>Michel Cauchon MD, CCFP</b>   | Professor, Département de médecine familiale et d'urgence, Université Laval                        | No                                                         | No                                        | No                                                                                                                  | No                                  | No                                        | Yes<br><br>Systematic review on statins and primary prevention | No                                 | No                                 |
| <b>Mike Cotterill MD CCFP</b>    | Assistant Professor, Division of Clinical Sciences, Northern Ontario School of Medicine University | No                                                         | No                                        | Yes<br>Co- applicant for a Northern Ontario Academic Medical Association grant, unrelated to cardiovascular disease | No                                  | No                                        | No                                                             | No                                 | No                                 |
| <b>Norah Duggan MD CCFP FCFP</b> | Associate Professor, Discipline of Family Medicine, Memorial University of                         | Yes<br><br>ALARM course instructor and course director for | No                                        | Yes<br>Cox Award from Memorial University Faculty of Medicine for                                                   | No                                  | No                                        | No                                                             | No                                 | No                                 |

| Name                                 | Affiliation                                                                                    | Direct financial relationships                                                                                                | Advisory board or speaker's bureau | Funded grants, research, or clinical trials                                                                                                                                        | Patents for a drug or device | Other investments or relationships | Written related articles                                                                                                                                                                                   | Presented on related topics                                                                                                       | Apps, software, tools, etc. |
|--------------------------------------|------------------------------------------------------------------------------------------------|-------------------------------------------------------------------------------------------------------------------------------|------------------------------------|------------------------------------------------------------------------------------------------------------------------------------------------------------------------------------|------------------------------|------------------------------------|------------------------------------------------------------------------------------------------------------------------------------------------------------------------------------------------------------|-----------------------------------------------------------------------------------------------------------------------------------|-----------------------------|
|                                      | Newfoundland Faculty of Medicine                                                               | SOGC/CFPC-NL                                                                                                                  |                                    | medical education research                                                                                                                                                         |                              |                                    |                                                                                                                                                                                                            |                                                                                                                                   |                             |
| <b>Alex S Halme RPh MD FRCPC</b>     | Internist-geriatrician, CISSS Montérégie-Est (Hôpital Pierre-Boucher) and CISSS de la Gaspésie | Yes<br>Conference for Société québécoise de gériatrie (topic was top 5 articles in the geriatric medicine literature in 2021) | No                                 | Yes<br>CIHR MSc grant for AI project (MSc), funding with access to Canadian longitudinal study on aging                                                                            | No                           | No                                 | No                                                                                                                                                                                                         | Yes<br>During rounds to residents, but not in formal context; sit on INESSS board for review of medications which include CV meds | No                          |
| <b>Scott Klarenbach MD FRCPC MSc</b> | Professor, Department of Medicine and Dentistry, University of Alberta                         | No                                                                                                                            | No                                 | Yes<br>Director of the Real World Evidence Consortium (Universities of Alberta and Calgary, Institute of Health Economics) that conduct investigator initiated, industry sponsored | No                           | No                                 | Yes<br>Co-author on 2 publications: Association between LDL-C and risk of myocardial infarction in CKD (2013) and Efficacy of statins for primary prevention in people at low cardiovascular risk: a meta- | Yes                                                                                                                               | No                          |

| Name                                       | Affiliation                                                     | Direct financial relationships                                                                                                | Advisory board or speaker's bureau | Funded grants, research, or clinical trials                                                                                                                                                                         | Patents for a drug or device | Other investments or relationships                                                                                   | Written related articles                                                                                                                                                 | Presented on related topics              | Apps, software, tools, etc. |
|--------------------------------------------|-----------------------------------------------------------------|-------------------------------------------------------------------------------------------------------------------------------|------------------------------------|---------------------------------------------------------------------------------------------------------------------------------------------------------------------------------------------------------------------|------------------------------|----------------------------------------------------------------------------------------------------------------------|--------------------------------------------------------------------------------------------------------------------------------------------------------------------------|------------------------------------------|-----------------------------|
|                                            |                                                                 |                                                                                                                               |                                    | studies, authors retain academic freedom of publication; no current or planned studies are on individual drugs for CVD, although description of medication use in patients at CV risk (Type2 DM) is being performed |                              |                                                                                                                      | analysis (2011). Have also examined association of statin and AKI, cost-effectiveness of low / high potency statin. I did not receive industry funding for any of these. |                                          |                             |
| <b>Michael R Kolber MD CCFP MSc</b>        | Professor, Department of Family Medicine, University of Alberta | Yes<br>Expense reimbursement and honoraria from not for profits for presentations: CFPC, ACFP, SRPC, MEME Peterborough Health | No                                 | Yes<br>CIHR, PRUIS (collaborator), participant in publicly funded trials under Pragmatic Trials Collaboration (BedMed Trial)                                                                                        | No                           | Yes<br>Founder of EMRSS (University of Alberta spin off company that evaluates the quality of endoscopies performed) | Yes<br>2015 PEER lipid guideline author, various Tools for Practice                                                                                                      | Yes<br>Presented on CVD for primary care | No                          |
| <b>Adrienne J Lindblad BSP ACPR PharmD</b> | Clinical Evidence Expert Lead, College of                       | Yes<br>Paid employee (CFPC 2020-                                                                                              | No                                 | No                                                                                                                                                                                                                  | No                           | No                                                                                                                   | Yes<br>Author of PEER's 2015 Simplified                                                                                                                                  | Yes<br>Various talks related to          | No                          |

| Name                                 | Affiliation                                                                                                | Direct financial relationships                                                                                  | Advisory board or speaker's bureau | Funded grants, research, or clinical trials | Patents for a drug or device | Other investments or relationships | Written related articles                                                                                   | Presented on related topics | Apps, software, tools, etc. |
|--------------------------------------|------------------------------------------------------------------------------------------------------------|-----------------------------------------------------------------------------------------------------------------|------------------------------------|---------------------------------------------|------------------------------|------------------------------------|------------------------------------------------------------------------------------------------------------|-----------------------------|-----------------------------|
|                                      | Family Physicians of Canada; Associate Clinical Professor, Dept. of Family Medicine, University of Alberta | present, ACFP 2013-2020); Speaker's honoraria (ACFP, SCFP, PEER, MEME, RxA, North of 44)                        |                                    |                                             |                              |                                    | Lipid Guideline; Various Tools for Practice articles                                                       | the 2015 lipid guideline    |                             |
| <b>Raelene D Marceau BScN MN PhD</b> | Assistant Professor, School of Nursing, University of Northern British Columbia                            | No                                                                                                              | No                                 | No                                          | No                           | No                                 | No                                                                                                         | No                          | No                          |
| <b>Tanis Poshtar</b>                 | Patient                                                                                                    | No                                                                                                              | No                                 | No                                          | No                           | No                                 | No                                                                                                         | No                          | No                          |
| <b>Loren D Regier BSP BA</b>         | Consultant Editor, RxFiles Academic Detailing                                                              | Yes<br>Work for not-for-profit educational academic detailing services (RxFiles, Centre for Effective Practice) | No                                 | No                                          | No                           | No                                 | Yes<br>Various lipid reviews, trial summaries, and comparisons for non-profit (RxFiles Academic Detailing) | No                          | No                          |
| <b>Rebecca Whitley MD</b>            | Assistant Professor,                                                                                       | No                                                                                                              | No                                 | No                                          | No                           | No                                 | No                                                                                                         | No                          | No                          |

| Name                           | Affiliation                                                                       | Direct financial relationships                                                                                                                                                                                                                                                             | Advisory board or speaker's bureau | Funded grants, research, or clinical trials    | Patents for a drug or device | Other investments or relationships | Written related articles                                                                                                                     | Presented on related topics                                               | Apps, software, tools, etc.        |
|--------------------------------|-----------------------------------------------------------------------------------|--------------------------------------------------------------------------------------------------------------------------------------------------------------------------------------------------------------------------------------------------------------------------------------------|------------------------------------|------------------------------------------------|------------------------------|------------------------------------|----------------------------------------------------------------------------------------------------------------------------------------------|---------------------------------------------------------------------------|------------------------------------|
| CCFP                           | Department of Family Medicine, University of Manitoba                             |                                                                                                                                                                                                                                                                                            |                                    |                                                |                              |                                    |                                                                                                                                              |                                                                           |                                    |
| <b>EVIDENCE TEAM</b>           |                                                                                   |                                                                                                                                                                                                                                                                                            |                                    |                                                |                              |                                    |                                                                                                                                              |                                                                           |                                    |
| <b>G Michael Allen MD CCFP</b> | Director of Programs and Practice Support, College of Family Physicians of Canada | Yes<br>Speaking (with travel and/or honorarium) for Diabetes Society Edmonton, ACFP family medicine summit and PEIP, SRPC, BS Medicine, NBCFP, OCFP, Peterborough Hosp Society, UBC CPD dept, Sharp HMO, WCB AB, worksafe BC, RxFiles, MEME conference, NLCCFP. Nothing from drug industry | No                                 | Yes<br>BedMed (public funding: CIHR and PRIHS) | No                           | No                                 | Yes<br>Tools for Practice on CVD; hypertension systematic review; publications including risk assessment papers; simplified lipid guidelines | Yes<br>Multiple talks on CVD, multiple times per year for last 10+ years. | Yes<br>BS medicine risk calculator |
| <b>Émélie Braschi</b>          | Lecturer, Department                                                              | Yes<br>CFPC salary                                                                                                                                                                                                                                                                         | No                                 | No                                             | No                           | No                                 | No                                                                                                                                           | No                                                                        | Yes                                |

| Name                                  | Affiliation                                                                                                       | Direct financial relationships                                                                                                                                                                                                                                                                                                            | Advisory board or speaker's bureau | Funded grants, research, or clinical trials                                                                                                                     | Patents for a drug or device | Other investments or relationships | Written related articles | Presented on related topics                                                                  | Apps, software, tools, etc. |
|---------------------------------------|-------------------------------------------------------------------------------------------------------------------|-------------------------------------------------------------------------------------------------------------------------------------------------------------------------------------------------------------------------------------------------------------------------------------------------------------------------------------------|------------------------------------|-----------------------------------------------------------------------------------------------------------------------------------------------------------------|------------------------------|------------------------------------|--------------------------|----------------------------------------------------------------------------------------------|-----------------------------|
| <b>MD CCFP<br/>PhD</b>                | of Family Medicine, University of Ottawa                                                                          |                                                                                                                                                                                                                                                                                                                                           |                                    |                                                                                                                                                                 |                              |                                    |                          |                                                                                              | CFPC Learn in the Clinic    |
| <b>Nicolas Dugré PharmD MSc BCACP</b> | Pharmacist, CIUSSS du Nord-de-l'Île-de-Montréal; Associate Professor, Faculty of Pharmacy, Université de Montréal | Yes<br>Honoraria for articles and presentations: Fédération des médecins omnipraticiens du Québec, Ordre des pharmaciens du Québec, Uniprix, Familiprix, Jean-Coutu, College of Family Physicians of Canada, Association des pharmaciens du Saguenay-Lac-St-Jean, Société québécoise de la douleur, Fédération des pharmaciens du Québec, | No                                 | Yes<br>Research funded by non-industry related grants (Réseau-1 Québec and Fondation du Cercle du Doyen de la faculté de pharmacie de l'Université de Montréal) | No                           | No                                 | No                       | Yes<br>Presentation on hypolipemias for the Federation des médecins omnipraticiens du Québec | No                          |

| Name                                          | Affiliation                                                                                     | Direct financial relationships                                                        | Advisory board or speaker's bureau | Funded grants, research, or clinical trials                                                                            | Patents for a drug or device | Other investments or relationships | Written related articles                                          | Presented on related topics                                                                                                           | Apps, software, tools, etc. |
|-----------------------------------------------|-------------------------------------------------------------------------------------------------|---------------------------------------------------------------------------------------|------------------------------------|------------------------------------------------------------------------------------------------------------------------|------------------------------|------------------------------------|-------------------------------------------------------------------|---------------------------------------------------------------------------------------------------------------------------------------|-----------------------------|
|                                               |                                                                                                 | Pharmascope, EnsembleIQ.                                                              |                                    |                                                                                                                        |                              |                                    |                                                                   |                                                                                                                                       |                             |
| <b>Jamie Falk<br/>BSc (Pharm)<br/>PharmD</b>  | Associate Professor, College of Pharmacy/ Department of Family Medicine, University of Manitoba | Yes<br>Board member, conference organizer, speaker for Health Education Collaboration | No                                 | Yes<br>Ongoing grant to track and document opioid use and misuse in Manitoba, College of Pharmacists of Manitoba       | No                           | No                                 | No                                                                | Yes<br>All of these are topics I am asked to speak on at conferences for pharmacists, physicians, and other health care professionals | No                          |
| <b>Liesbeth S<br/>Froentjes<br/>MSc</b>       | Research Assistant, Department of Family Medicine, University of Alberta                        | Yes<br><br>Independent contractor for CFPC                                            | No                                 | No                                                                                                                     | No                           | No                                 | No                                                                | No                                                                                                                                    | No                          |
| <b>Scott<br/>Garrison<br/>MD CCFP<br/>PhD</b> | Professor, Dept of Family Medicine, University of Alberta                                       | No                                                                                    | No                                 | Yes<br>CIHR, Alberta Innovates; principal investigator for the publicly funded BedMed trial. I receive no funding from | No                           | No                                 | Yes<br>Evidence reviewer for the first Simplified Lipid Guideline | Yes<br>CV risk reduction is often part of any talk on EBM or prevention, which I give periodically to learners or family              | No                          |



| Name                                    | Affiliation                                                               | Direct financial relationships                                                                                                | Advisory board or speaker's bureau | Funded grants, research, or clinical trials                                                                                      | Patents for a drug or device | Other investments or relationships                                                                                    | Written related articles                                                                                               | Presented on related topics                                     | Apps, software, tools, etc. |
|-----------------------------------------|---------------------------------------------------------------------------|-------------------------------------------------------------------------------------------------------------------------------|------------------------------------|----------------------------------------------------------------------------------------------------------------------------------|------------------------------|-----------------------------------------------------------------------------------------------------------------------|------------------------------------------------------------------------------------------------------------------------|-----------------------------------------------------------------|-----------------------------|
|                                         |                                                                           |                                                                                                                               |                                    | these grants personally.                                                                                                         |                              |                                                                                                                       |                                                                                                                        | physicians at CME events                                        |                             |
| <b>Jessica EM Kirkwood MD CCFP (AM)</b> | Assistant Professor, Department of Family Medicine, University of Alberta | Yes<br><br>Speaker's honoraria from CFPC, ACFP and CPSS                                                                       | No                                 | No                                                                                                                               | No                           | No                                                                                                                    | No                                                                                                                     | No                                                              | No                          |
| <b>Michael R Kolber MD CCFP MSc</b>     | Professor, Department of Family Medicine, University of Alberta           | Yes<br>Expense reimbursement and honoraria from not for profits for presentations: CFPC, ACFP, SRPC, MEME Peterborough Health | No                                 | Yes<br><br>CIHR, PRUIS (collaborator), participant in publicly funded trials under Pragmatic Trials Collaboration (BedMed Trial) | No                           | Yes<br>Founder of EMPRSS (University of Alberta spin off company that evaluates the quality of endoscopies performed) | Yes<br>2015 PEER lipid guideline author, various Tools for Practice                                                    | Yes<br>Presented on CVD for primary care                        | No                          |
| <b>Christina Korownyk MD CCFP</b>       | Professor, Department of Family Medicine, University of Alberta           | Yes<br><br>Speaker at various conferences:                                                                                    | No                                 | Yes<br><br>BedMed Trial funded by CIHR, PRIHS                                                                                    | No                           | No                                                                                                                    | Yes<br><br>Author on related Tools for Practice and Clinical practice guidelines have big problems: The fix is simple. | Yes<br><br>Presented on primary and secondary prevention of CVD | No                          |

| Name                                                | Affiliation                                                                                                                                          | Direct financial relationships                                                                                                                                                                                                    | Advisory board or speaker's bureau | Funded grants, research, or clinical trials | Patents for a drug or device | Other investments or relationships | Written related articles                                                                                                                                                 | Presented on related topics                                                                                       | Apps, software, tools, etc. |
|-----------------------------------------------------|------------------------------------------------------------------------------------------------------------------------------------------------------|-----------------------------------------------------------------------------------------------------------------------------------------------------------------------------------------------------------------------------------|------------------------------------|---------------------------------------------|------------------------------|------------------------------------|--------------------------------------------------------------------------------------------------------------------------------------------------------------------------|-------------------------------------------------------------------------------------------------------------------|-----------------------------|
| <b>Adrienne J Lindblad<br/>BSP ACPR<br/>PharmD</b>  | Clinical Evidence Expert Lead, College of Family Physicians of Canada; Associate Clinical Professor, Dept. of Family Medicine, University of Alberta | Yes<br>CFPC; ACFP; SCFP; PEER; MEME; Alberta Pharmacists Association (RxA); North of 44 Primary Care Symposium; Paid employee (CFPC 2020-present, ACFP 2013-2020); Speaker's honoraria (ACFP, SCFP, PEER, MEME, RxA, North of 44) | No                                 | No                                          | No                           | No                                 | Yes<br>Author of PEER's 2015 Simplified Lipid Guideline; Various Tools for Practice articles. Author: Clinical practice guidelines have big problems: The fix is simple. | Yes<br>Various talks related to the 2015 lipid guideline                                                          | No                          |
| <b>James P McCormack<br/>BSc (Pharm)<br/>PharmD</b> | Professor, Faculty of Pharmaceutical Sciences, University of British Columbia                                                                        | Yes<br>Speaker at various conferences, BS Medicine Podcast, book: The Nutrition Proposition                                                                                                                                       | No                                 | No                                          | No                           | No                                 | Yes<br>Author: Clinical practice guidelines have big problems: The fix is simple.                                                                                        | Yes<br>I have given a number of talks on guidelines and lipids specifically over the last 2-3 years, all for non- | No                          |

| Name                              | Affiliation                                                                | Direct financial relationships                                                                      | Advisory board or speaker's bureau | Funded grants, research, or clinical trials | Patents for a drug or device | Other investments or relationships                                                                                                        | Written related articles | Presented on related topics                                           | Apps, software, tools, etc. |
|-----------------------------------|----------------------------------------------------------------------------|-----------------------------------------------------------------------------------------------------|------------------------------------|---------------------------------------------|------------------------------|-------------------------------------------------------------------------------------------------------------------------------------------|--------------------------|-----------------------------------------------------------------------|-----------------------------|
|                                   |                                                                            |                                                                                                     |                                    |                                             |                              |                                                                                                                                           |                          | profit organizations                                                  |                             |
| <b>Samantha S Moe PharmD ACPR</b> | Clinical Evidence Expert, College of Family Physicians of Canada           | Yes<br>ACFP, PEIP conference                                                                        | No                                 | No                                          | No                           | No                                                                                                                                        | No                       | Yes<br>General CV topics that come up in New True Poo, Jeopardy, etc. | No                          |
| <b>Allison Paige MD CCFP</b>      | Assistant Professor, Department of Family Medicine, University of Manitoba | Yes<br>ACFP, speaker at the Family Medicine Summit 2022 - received an honorarium;                   | No                                 | No                                          | No                           | Yes<br>Employee at the University of Manitoba Department of Family Medicine; Independent contractor at Winnipeg Regional Health Authority | Yes                      | No                                                                    | No                          |
| <b>Danielle Perry RN MSc</b>      | Clinical Evidence Expert, College of Family Physicians of Canada           | Yes<br>CFPC (employee), Correctional Services of Canada (employee), ACFP, PEER (PEIP + PEER North), | No                                 | No                                          | No                           | No                                                                                                                                        | No                       | No                                                                    | No                          |

| Name                            | Affiliation                                                                                                                             | Direct financial relationships                                      | Advisory board or speaker's bureau | Funded grants, research, or clinical trials | Patents for a drug or device | Other investments or relationships | Written related articles                                            | Presented on related topics                                                                                                                   | Apps, software, tools, etc. |
|---------------------------------|-----------------------------------------------------------------------------------------------------------------------------------------|---------------------------------------------------------------------|------------------------------------|---------------------------------------------|------------------------------|------------------------------------|---------------------------------------------------------------------|-----------------------------------------------------------------------------------------------------------------------------------------------|-----------------------------|
|                                 |                                                                                                                                         | Dalhousie CPD, Centre for Effective Practice (receipt of honoraria) |                                    |                                             |                              |                                    |                                                                     |                                                                                                                                               |                             |
| <b>Jen Potter MD CCFP</b>       | Assistant Professor, Department of Family Medicine, University of Manitoba                                                              | Yes                                                                 | No                                 | No                                          | No                           | No                                 | No                                                                  | Yes<br>Academic half-day sessions to family medicine residents                                                                                | No                          |
| <b>Betsy S Thomas BSc Pharm</b> | Clinical Evidence Expert for the CFPC and Assistant Adjunct Professor in the Department of Family Medicine at the University of Alberta | Yes<br>Honoraria received for talk at Family Medicine Summit, ACFP  | No                                 | No                                          | No                           | No                                 | Yes                                                                 | Yes<br>I have presented on various CV studies to family physicians and/or primary care providers as part of the Best Practice Support Program | No                          |
| <b>Joey Ton PharmD</b>          | Program Manager, Programs and Practice Support Department, College of                                                                   | No                                                                  | No                                 | No                                          | No                           | No                                 | Yes<br><br>I have written "Tools for Practice" on PCSK-9 inhibitors | Yes<br>I have presented on the evidence written                                                                                               | No                          |

| Name                               | Affiliation                                                                      | Direct financial relationships                                      | Advisory board or speaker's bureau | Funded grants, research, or clinical trials | Patents for a drug or device | Other investments or relationships | Written related articles | Presented on related topics                                                                              | Apps, software, tools, etc. |
|------------------------------------|----------------------------------------------------------------------------------|---------------------------------------------------------------------|------------------------------------|---------------------------------------------|------------------------------|------------------------------------|--------------------------|----------------------------------------------------------------------------------------------------------|-----------------------------|
|                                    | Family Physicians of Canada                                                      |                                                                     |                                    |                                             |                              |                                    |                          | about PCSK-9 inhibitors                                                                                  |                             |
| <b>Justin Weresch MD CCFP</b>      | Assistant Professor, Department of Family Medicine, McMaster University          | No                                                                  | No                                 | No                                          | No                           | No                                 | No                       | No                                                                                                       | No                          |
| <b>Jennifer Young MD CCFP (EM)</b> | Associate Clinical Professor, Department of Family Medicine, McMaster University | Yes<br>Speaker for OCFP;<br>working for PEER team on pain guideline | No                                 | No                                          | No                           | No                                 | No                       | Yes<br>I have presented the Risk Calculator in a course "Practicing Wisely" and in a case of CFPC Clinic | No                          |

ACFP = Alberta College of Family Physicians; AKI = acute kidney injury; ALARM = Advances in Labour and Risk Management; BC = British Columbia; CFPC = College of Family Physicians of Canada; CIHR = Canadian Institutes of Health Research; CISSS = Integrated Health and Social Services Centres; CIUSSS = Integrated University Health and Social Services Centre; CKD = chronic kidney disease; CME = Continuing Medical Education; CPD = Continuing Professional Development; CPSS = College of Physicians and Surgeons of Saskatchewan; CTFPHC = Canadian Task Force on Preventive Health Care; CV = cardiovascular; CVD = cardiovascular disease; DM = diabetes mellitus; EBM = evidence-based medicine; INESSS = Institut National d'Excellence en Santé et Services Sociaux; LDL-C = low-density-lipoprotein-cholesterol; MEME = Making Evidence Matter for Everyone; NBCFP = New Brunswick College of Family Physicians; NLCCFP = Newfoundland and Labrador College of Family Physicians; OCFP = Ontario College of Family Physicians; PCSK-9 = Proprotein convertase subtilisin/kexin type 9; PEER = Patients, Experience, Evidence, Research; PEIP = Practical Evidence for Informed Practice; PRIHS = Partnership for Research and Innovation in the Health System; RCT = randomized controlled trial; SFCP = Saskatchewan College of Family Physicians; SOGC = Society of Obstetricians and Gynaecologists of Canada; SRPC = Society of Rural Physicians of Canada; UBC CPD= University of British Columbia, Continuing Professional Development; U of A = University of Alberta; WCB AB = Workers' Compensation Board of Alberta

**APPENDIX 1B: STRENGTH OF RECOMMENDATIONS SUMMARY**

| RECOMMENDATION                        |                                                                                                                                                                                                                                                                                                                                                                                                                                                   | STRENGTH                |
|---------------------------------------|---------------------------------------------------------------------------------------------------------------------------------------------------------------------------------------------------------------------------------------------------------------------------------------------------------------------------------------------------------------------------------------------------------------------------------------------------|-------------------------|
| <b>Screening and Testing</b>          |                                                                                                                                                                                                                                                                                                                                                                                                                                                   |                         |
| 1                                     | In patients without CVD (primary prevention), we <b>suggest</b> lipid testing as part of global CVD risk estimation in men at age $\geq 40$ y and women at age $\geq 50$ y. <ul style="list-style-type: none"> <li>Testing can be considered earlier for patients with known traditional CVD risk factors including, but not limited to, hypertension, family history of premature CVD, chronic kidney disease, diabetes, and smoking.</li> </ul> | Weak for                |
| 2                                     | When reassessing cardiovascular risk in patients not taking lipid-lowering therapy, we <b>suggest</b> reassessing lipids no more than every 5 years and preferably 10, unless risk factors change.                                                                                                                                                                                                                                                | Weak for                |
| 3                                     | We <b>recommend against</b> fasting for lipid testing. Non-fasting lipids can be used to calculate global CVD risk.                                                                                                                                                                                                                                                                                                                               | Strong against          |
| 4                                     | We <b>recommend against</b> risk estimation for those with pre-existing CVD as they are at high risk.                                                                                                                                                                                                                                                                                                                                             | Strong against          |
| 5                                     | We <b>suggest against</b> adding CAC scores to cardiovascular risk assessment.                                                                                                                                                                                                                                                                                                                                                                    | Weak against            |
| 6                                     | We <b>recommend against</b> using Lp(a) or apoB to determine a patient's cardiovascular risk.                                                                                                                                                                                                                                                                                                                                                     | Strong against          |
| <b>Interventions</b>                  |                                                                                                                                                                                                                                                                                                                                                                                                                                                   |                         |
| 7                                     | We <b>suggest</b> encouraging patients to participate in physical activity. The specific type, duration and intensity is likely less important than adherence.                                                                                                                                                                                                                                                                                    | Weak for                |
| 8                                     | We <b>recommend</b> the Mediterranean diet to reduce cardiovascular risk.                                                                                                                                                                                                                                                                                                                                                                         | Strong for              |
| 9                                     | In primary prevention patients with a 10-y CVD risk of $\geq 20\%$ , we <b>recommend</b> clinicians discuss the initiation of statins (preferably high-intensity) with patients.                                                                                                                                                                                                                                                                  | Strong for              |
| 10                                    | In primary prevention patients with a 10-y CVD risk of 10-19%, we <b>suggest</b> clinicians discuss the initiation of statins (preferably moderate-intensity statins) with patients.                                                                                                                                                                                                                                                              | Weak for                |
| 11                                    | In primary prevention patients with a 10-y CVD risk of $< 10\%$ , we <b>suggest</b> retesting lipid levels in 5y at earliest, and preferably 10, with risk estimation.                                                                                                                                                                                                                                                                            | Weak for                |
| 12                                    | In primary prevention, we <b>recommend against</b> using non-statin lipid lowering drugs as monotherapy or in combination with statins.                                                                                                                                                                                                                                                                                                           | Strong against          |
| 13                                    | In secondary prevention, we <b>recommend</b> clinicians discuss the risks and benefits and encourage initiation of high-intensity statin therapy with patients.                                                                                                                                                                                                                                                                                   | Strong for              |
| 14                                    | In secondary prevention, for patients desiring additional reductions in their cardiovascular risk beyond maximized statin therapy, we <b>recommend</b> a discussion of ezetimibe or PCSK-9 inhibitors. Given potential adverse effects (atrial fibrillation, bleeding), we <b>suggest</b> adding icosapent to statins only after considering ezetimibe or PCSK-9 inhibitors.                                                                      | Strong for;<br>Weak for |
| <b>Considerations in Older Adults</b> |                                                                                                                                                                                                                                                                                                                                                                                                                                                   |                         |

| RECOMMENDATION            |                                                                                                                                                                                                                                                                                                | STRENGTH       |
|---------------------------|------------------------------------------------------------------------------------------------------------------------------------------------------------------------------------------------------------------------------------------------------------------------------------------------|----------------|
| 15                        | In primary prevention patients over the age of 75, we <b>recommend against</b> lipid testing and the assessment of risk using a CVD risk calculator.                                                                                                                                           | Strong against |
| 16                        | We <b>suggest against</b> the routine initiation of statin therapy for primary prevention in patients over age 75. However, it may be reasonable to discuss the benefits and risks of statin therapy for primary prevention in some patients over age 75 whose overall health status is good.  | Weak against   |
| 17                        | In patients over age 75 who have had a cardiovascular event, we <b>recommend</b> clinicians discuss the benefits and risks and encourage the initiation of statin therapy with patients.                                                                                                       | Strong for     |
| 18                        | In patients already taking and tolerating a statin, we <b>recommend against</b> stopping the statin or reducing the dose just because patients have aged beyond 75y.                                                                                                                           | Strong against |
| 19                        | We <b>recommend against</b> altering statin prescribing for cognitive concerns.                                                                                                                                                                                                                | Strong against |
| <b>Statin Intolerance</b> |                                                                                                                                                                                                                                                                                                |                |
| 20                        | In patients who do not tolerate a specific statin regimen due to non-severe muscle adverse effects, we <b>recommend</b> any statin intensity over non-statin lipid therapy. This could include different statins, doses, or alternate daily dosing, based on shared decision making.           | Strong for     |
| 21                        | For primary prevention patients unable to tolerate any statin rechallenge, we <b>suggest against</b> use of non-statin pharmacologic therapies.                                                                                                                                                | Weak against   |
| 22                        | For secondary prevention patients unable to tolerate any statin rechallenge, we <b>suggest</b> discussion of ezetimibe, fibrates, or PCSK-9 inhibitors. Given potential adverse events of icosapent (atrial fibrillation, bleeding), it should only be considered once other options explored. | Weak for       |
| <b>Follow-Up</b>          |                                                                                                                                                                                                                                                                                                |                |
| 23                        | We <b>recommend against</b> the use of repeat lipid testing and cholesterol targets after a patient begins lipid-lowering therapy.                                                                                                                                                             | Strong against |
| 24                        | We <b>suggest against</b> testing for baseline CK or ALT levels in healthy, asymptomatic individuals before starting statin therapy. Testing may be appropriate based on symptoms or other risk factors.                                                                                       | Weak against   |

ALT = alanine transaminase; apoB = apolipoprotein B; CAC = coronary artery calcium; CK = creatine kinase; CVD = cardiovascular disease; Lp(a) = lipoprotein A; PCSK-9 = proprotein convertase subtilisin/kexin type 9

#### **APPENDIX 1C: UPDATED RECOMMENDATIONS MATRIX**

*Table 1: VA/DoD recommendation categories and definitions\**

| Evidence Reviewed | Recommendation Category | Definition                                          |
|-------------------|-------------------------|-----------------------------------------------------|
| Reviewed          | New-added               | New recommendation following review of the evidence |

| Evidence Reviewed   | Recommendation Category | Definition                                                                                                                                                     |
|---------------------|-------------------------|----------------------------------------------------------------------------------------------------------------------------------------------------------------|
|                     | New-replaced            | Recommendation from previous CPG that has been carried over to the updated CPG that has been changed following review of the evidence                          |
|                     | Not changed             | Recommendation from previous CPG that has been carried forward to the updated CPG where the evidence has been reviewed but the recommendation was not changed  |
|                     | Amended                 | Recommendation from previous CPG that has been carried forward to the updated CPG where the evidence has been reviewed and a minor amendment was made          |
|                     | Deleted                 | Recommendation from previous CPG that has been removed based on review of the evidence                                                                         |
| <b>Not reviewed</b> | Not changed             | Recommendation from previous CPG that has been carried forward to the updated CPG, but for which the evidence has not been reviewed                            |
|                     | Amended                 | Recommendation from previous CPG that has been carried forward to the updated CPG where the evidence has not been reviewed and a minor amendment has been made |
|                     | Deleted                 | Recommendation from previous CPG that has been removed because it was deemed out of scope for the updated CPG                                                  |

\*Adapted from **The Management of Dyslipidemia for Cardiovascular Risk Reduction Work Group 2020** with permission from the US Department of Veterans Affairs, Department of Defense

CPG = clinical practice guideline; NICE = National Institute for Health and Care Excellence

*Table 2: Updated guideline recommendations matrix*

| 2015 Recommendation                                                                                                                                                  | Evidence Reviewed? | Recommendation Category | 2023 Recommendation                                                                                                                                                                                                                                                                                                                                                                         |
|----------------------------------------------------------------------------------------------------------------------------------------------------------------------|--------------------|-------------------------|---------------------------------------------------------------------------------------------------------------------------------------------------------------------------------------------------------------------------------------------------------------------------------------------------------------------------------------------------------------------------------------------|
| <b>SCREENING</b>                                                                                                                                                     |                    |                         |                                                                                                                                                                                                                                                                                                                                                                                             |
| In patients without CVD (primary prevention), we suggest lipid testing as part of global CVD risk estimation in men at age $\geq 40$ y and women at age $\geq 50$ y. | Not reviewed       | Amended                 | In patients without CVD (primary prevention), we suggest lipid testing as part of global CVD risk estimation in men at age $\geq 40$ y and women at age $\geq 50$ y.<br>Testing can be considered earlier for patients with known traditional CVD risk factors including, but not limited to, hypertension, family history of premature CVD, chronic kidney disease, diabetes, and smoking. |



| 2015 Recommendation                                                                                                                                                                                                                                                                                 | Evidence Reviewed? | Recommendation Category | 2023 Recommendation                                                                                                                                                                         |
|-----------------------------------------------------------------------------------------------------------------------------------------------------------------------------------------------------------------------------------------------------------------------------------------------------|--------------------|-------------------------|---------------------------------------------------------------------------------------------------------------------------------------------------------------------------------------------|
| Testing can be considered earlier for patients with known traditional CVD risk factors including, but not limited to, hypertension, family history of premature CVD, diabetes, and smoking.                                                                                                         | Not reviewed       | Deleted                 |                                                                                                                                                                                             |
| For patients not taking lipid-lowering therapy, we suggest lipid testing as part of global CVD risk estimation, performed no more than every 5 y (moderate-level evidence). Global CVD risk estimation can be repeated sooner if other CVD risk factors develop in the interim.                     | Reviewed           | Amended                 | When reassessing cardiovascular risk in patients not taking lipid-lowering therapy, we suggest reassessing lipids no more than every 5 years and preferably 10, unless risk factors change. |
| Patients do not need to fast for lipid testing. Nonfasting lipid levels can be used to calculate global CVD risk.                                                                                                                                                                                   | Not reviewed       | Amended                 | We recommend against fasting for lipid testing. Nonfasting lipids can be used to calculate global CVD risk.                                                                                 |
| <b>RISK ASSESSMENTS</b>                                                                                                                                                                                                                                                                             |                    |                         |                                                                                                                                                                                             |
| Primary prevention: We encourage risk estimation with a CVD risk calculator (e.g., Framingham) every time lipid testing is performed. Testing and risk estimation should be performed starting at age 40 y in men and 50 y in women (or earlier if indicated by other risk factors) until age 75 y. | Not reviewed       | Deleted                 |                                                                                                                                                                                             |
| Primary prevention in patients with diabetes mellitus: We encourage risk estimation as above.                                                                                                                                                                                                       | Not reviewed       | Deleted                 |                                                                                                                                                                                             |
| Primary prevention in patients with CKD: We recommend using a CVD risk calculator (e.g., QRISK2) that includes CKD in its estimation of risk.                                                                                                                                                       | Not reviewed       | Deleted                 |                                                                                                                                                                                             |
| We discourage risk estimation for those with pre-existing CVD, as they are automatically at high risk.                                                                                                                                                                                              | Not reviewed       | Amended                 | We recommend against risk estimation for those with pre-existing CVD as they are at high risk.                                                                                              |
| We discourage risk estimation for those < 40 y (without additional risk factors) and those > 75 y,                                                                                                                                                                                                  | Not reviewed       | Deleted                 |                                                                                                                                                                                             |

| 2015 Recommendation                                                                                                                                                                                                                                                                                                          | Evidence Reviewed? | Recommendation Category | 2023 Recommendation                                                                                                                                          |
|------------------------------------------------------------------------------------------------------------------------------------------------------------------------------------------------------------------------------------------------------------------------------------------------------------------------------|--------------------|-------------------------|--------------------------------------------------------------------------------------------------------------------------------------------------------------|
| as risk equations are not based on patients in these age ranges.                                                                                                                                                                                                                                                             |                    |                         |                                                                                                                                                              |
| We discourage risk estimation for those taking lipid therapy, as calculators are not designed to adjust for changes with lipid therapy. If risk calculation is desired for patients taking lipid therapy, pre-treatment lipid levels should be used and risk should be adjusted for known benefits of statin or ASA therapy. | Not reviewed       | Deleted                 |                                                                                                                                                              |
| We discourage the use of biomarkers as part of risk assessment until further evidence is available.                                                                                                                                                                                                                          | Reviewed           | New-replaced            | We suggest against adding CAC scores to cardiovascular risk assessment.                                                                                      |
|                                                                                                                                                                                                                                                                                                                              |                    | New-replaced            | We recommend against using Lp(a) or apoB to determine a patient's cardiovascular risk.                                                                       |
| <b>INTERVENTIONS</b>                                                                                                                                                                                                                                                                                                         |                    |                         |                                                                                                                                                              |
| Lifestyle interventions, including but not limited to smoking cessation, Mediterranean diet, and exercise, should be discussed with all patients.                                                                                                                                                                            | Reviewed           | New-replaced            | We suggest encouraging patients to participate in physical activity. The specific type, duration, and intensity is likely less important than adherence.     |
|                                                                                                                                                                                                                                                                                                                              |                    | New-replaced            | We recommend the Mediterranean diet to reduce cardiovascular risk.                                                                                           |
| Secondary-prevention patients: We strongly encourage clinicians to discuss the risks and benefits of high-intensity statin therapy with patients.                                                                                                                                                                            | Reviewed           | Amended                 | In secondary prevention, we recommend clinicians discuss the risks and benefits and encourage initiation of high-intensity statin therapy with patients.     |
| Primary-prevention patients: We suggest clinicians discuss the risks and benefits of moderate- or high-intensity statins with their patients based on an individual's risk of CVD.                                                                                                                                           | Not reviewed       | Deleted                 |                                                                                                                                                              |
| Primary prevention patients: For patients with a 10-y CVD risk of <10%, we suggest retesting lipid levels in 5 y with risk estimation.                                                                                                                                                                                       | Reviewed           | Amended                 | In primary prevention patients with a 10-y CVD risk of < 10%, we suggest retesting lipid levels in 5 y at earliest, and preferably 10, with risk estimation. |
| Primary prevention patients: For patients with a 10-y CVD risk of 10%-19%, we suggest clinicians                                                                                                                                                                                                                             | Reviewed           | Amended                 | In primary prevention patients with a 10-y CVD risk of 10-19%, we suggest clinicians discuss the                                                             |

| 2015 Recommendation                                                                                                                                                                                                                                             | Evidence Reviewed? | Recommendation Category | 2023 Recommendation                                                                                                                                                                                                                                                                    |
|-----------------------------------------------------------------------------------------------------------------------------------------------------------------------------------------------------------------------------------------------------------------|--------------------|-------------------------|----------------------------------------------------------------------------------------------------------------------------------------------------------------------------------------------------------------------------------------------------------------------------------------|
| discuss initiation of statins (preferably moderate-intensity statins) with patients.                                                                                                                                                                            |                    |                         | initiation of statins (preferably moderate-intensity statins) with patients.                                                                                                                                                                                                           |
| Primary prevention patients: For patients with a 10-y CVD risk of $\geq 20\%$ , we strongly encourage clinicians to discuss initiation of statins (preferably high-intensity) with patients.                                                                    | Reviewed           | Amended                 | In primary prevention patients with a 10-y CVD risk of $\geq 20\%$ , we recommend clinicians discuss the initiation of statins (preferably high-intensity) with patients.                                                                                                              |
| Patients who are elderly (based on frailty as much as age) or those with renal impairment can be offered lower-intensity statin therapy (low-level evidence).                                                                                                   | Not reviewed       | Deleted                 |                                                                                                                                                                                                                                                                                        |
| Primary prevention patients > 75 y: We discourage routinely testing lipid levels, estimating CVD risk, and prescribing statins (moderate-level evidence).                                                                                                       | Reviewed           | Amended                 | In primary prevention patients over the age of 75, we recommend against lipid testing and the assessment of risk using a CVD risk calculator.                                                                                                                                          |
| Primary prevention patients > 75 y: Some patients > 75 y whose life expectancy and overall health status are good can be offered statin therapy for primary prevention, but this should be left to the clinician and patient's discretion (low-level evidence). | Not reviewed       | Amended                 | We suggest against the routine initiation of statin therapy for primary prevention in patients over age 75. However, it may be reasonable to discuss the benefits and risks of statin therapy for primary prevention in some patients over age 75 whose overall health status is good. |
| Secondary prevention patients >75 y: We strongly encourage clinicians to discuss the risks and benefits of moderate-intensity statins with patients (high-level evidence).                                                                                      | Reviewed           | Amended                 | In patients over age 75 who have had a cardiovascular event, we recommend clinicians discuss the benefits and risks and encourage the initiation of statin therapy with patients.                                                                                                      |
| Secondary prevention patients > 75 y: Patients already taking and tolerating a statin should not have their statin stopped or reduced just because they have aged beyond 75 y (low-level evidence).                                                             | Reviewed           | Amended                 | In patients already taking and tolerating a statin, we recommend the statin not be stopped or reduced just because they have aged beyond 75 y.                                                                                                                                         |
| In patients $\geq 65$ y, pravastatin should likely not be considered first-line therapy until uncertainty                                                                                                                                                       | Reviewed           | Deleted                 |                                                                                                                                                                                                                                                                                        |

| 2015 Recommendation                                                                                                                                                                                                                                        | Evidence Reviewed? | Recommendation Category | 2023 Recommendation                                                                                                                                                                                                                                                                     |
|------------------------------------------------------------------------------------------------------------------------------------------------------------------------------------------------------------------------------------------------------------|--------------------|-------------------------|-----------------------------------------------------------------------------------------------------------------------------------------------------------------------------------------------------------------------------------------------------------------------------------------|
| surrounding cancer in this subgroup with this drug is resolved (moderate-level evidence).                                                                                                                                                                  |                    |                         |                                                                                                                                                                                                                                                                                         |
|                                                                                                                                                                                                                                                            | Reviewed           | New-added               | We recommend against altering statin prescribing for cognitive concerns.                                                                                                                                                                                                                |
| Patients who do not tolerate a specific statin regimen should be offered a lower-intensity regimen, with either the same or a different statin, or a short drug holiday followed by rechallenge to help clarify if statins are related to the intolerance. | Reviewed           | Amended                 | In patients who do not tolerate a specific statin regimen due to non-severe muscle adverse effects, we recommend any statin intensity over non-statin lipid therapy. This could include different statins, doses, or alternate daily dosing, based on shared decision making.           |
| In patients who do not tolerate a specific statin regimen, any statin intensity is preferred to non-statin lipid-lowering therapy.                                                                                                                         | Reviewed           | Deleted                 |                                                                                                                                                                                                                                                                                         |
| In patients who do not tolerate a specific statin regimen, alternate daily dosing can be considered if a patient does not tolerate daily dosing.                                                                                                           | Reviewed           | Deleted                 |                                                                                                                                                                                                                                                                                         |
|                                                                                                                                                                                                                                                            | Reviewed           | New-added               | For primary prevention patients unable to tolerate any statin rechallenge, we suggest against use of non-statin pharmacologic therapies.                                                                                                                                                |
|                                                                                                                                                                                                                                                            | Reviewed           | New-added               | For secondary prevention patients unable to tolerate any statin rechallenge, we suggest discussion of ezetimibe, fibrates, or PCSK-9 inhibitors. Given potential adverse events of icosapent (atrial fibrillation, bleeding), it should only be considered once other options explored. |
| In patients who have severe reactions like rhabdomyolysis, retreatment might not be appropriate.                                                                                                                                                           | Not reviewed       | Deleted                 |                                                                                                                                                                                                                                                                                         |
| In primary prevention, non-statin lipid-lowering drugs should not be used as first-line monotherapy or in combination with statins.                                                                                                                        | Reviewed           | Amended                 | In primary prevention, we recommend against using non-statin lipid lowering drugs as monotherapy or in combination with statins.                                                                                                                                                        |
| In secondary prevention, ezetimibe can be considered in discussion with patients as add-on                                                                                                                                                                 | Reviewed           | New-replaced            | In secondary prevention, if additional cardiovascular risk reduction is desired beyond                                                                                                                                                                                                  |

| 2015 Recommendation                                                                                                                                                                                                                                        | Evidence Reviewed? | Recommendation Category | 2023 Recommendation                                                                                                                                                                                                                                   |
|------------------------------------------------------------------------------------------------------------------------------------------------------------------------------------------------------------------------------------------------------------|--------------------|-------------------------|-------------------------------------------------------------------------------------------------------------------------------------------------------------------------------------------------------------------------------------------------------|
| therapy to statins, but owing to the higher relative benefit of statins, statin therapy should be maximized first (to high intensity).                                                                                                                     |                    |                         | maximized statin therapy, we recommend a discussion of ezetimibe or PCSK-9 inhibitors. Given potential adverse effects (atrial fibrillation, bleeding), we suggest adding icosapent to statins only after considering ezetimibe or PCSK-9 inhibitors. |
| <b>FOLLOW-UP</b>                                                                                                                                                                                                                                           |                    |                         |                                                                                                                                                                                                                                                       |
| The use of cholesterol targets for reducing CVD is not required.                                                                                                                                                                                           | Reviewed           | Amended                 | We recommend against the use of repeat lipid testing and cholesterol targets after a patient begins lipid-lowering therapy.                                                                                                                           |
| We suggest that the monitoring of repeat lipid levels after a patient begins lipid-lowering therapy is not required.<br>- Adherence to statins can be improved with patient reinforcement.                                                                 | Reviewed           | Deleted                 |                                                                                                                                                                                                                                                       |
| We suggest that testing for baseline CK or ALT levels in healthy individuals before starting statin therapy is generally unnecessary. The evidence against testing baseline ALT or CK levels is poor and some clinicians might prefer to test one or both. | Not reviewed       | Amended                 | We suggest against testing for baseline CK or ALT levels in healthy, asymptomatic individuals before starting statin therapy. Testing may be appropriate based on symptoms or other risk factors.                                                     |
| Routine monitoring of CK and ALT levels should be reserved for those patients who are symptomatic or who are at higher risk of adverse events. Frequency should be determined at the discretion of the attending clinician.                                | Not reviewed       | Deleted                 |                                                                                                                                                                                                                                                       |
| <b>PRIMARY PREVENTION WITH ASA</b>                                                                                                                                                                                                                         |                    |                         |                                                                                                                                                                                                                                                       |
| We discourage the use of ASA for patients without previous CVD and an estimated 10-y CVD risk < 20%.                                                                                                                                                       | Not reviewed       | Deleted                 |                                                                                                                                                                                                                                                       |

| 2015 Recommendation                                                                                                 | Evidence Reviewed? | Recommendation Category | 2023 Recommendation |
|---------------------------------------------------------------------------------------------------------------------|--------------------|-------------------------|---------------------|
| We suggest ASA can be considered in primary prevention if the 10-y CVD risk is $\geq$ 20% and bleeding risk is low. | Not reviewed       | Deleted                 |                     |
| Use of ASA for primary CVD prevention should be considered after statin therapy has been discussed.                 | Not reviewed       | Deleted                 |                     |
| Patients offered ASA should be informed of the potential benefits and harms of ASA use.                             | Not reviewed       | Deleted                 |                     |

ALT = alanine transaminase; apoB = apolipoprotein B; ASA = acetylsalicylic acid; CAC = coronary artery calcium; CK = creatine kinase; CKD = chronic kidney disease; CVD = cardiovascular disease; Lp(a) = lipoprotein A; PCSK-9 = proprotein convertase subtilisin/kexin type 9

## REFERENCES

- The Management of Dyslipidemia for Cardiovascular Risk Reduction Work Group. VA/DoD clinical practice guideline for the management of dyslipidemia for cardiovascular risk reduction. US Department of Veterans Affairs, Department of Defense. 2020. 127 p.

## **APPENDIX 1D: SUPPLEMENTAL QUESTIONS**

### **TABLE OF CONTENTS**

|                                                                             |     |
|-----------------------------------------------------------------------------|-----|
| INTRODUCTION AND METHODS .....                                              | 24  |
| CHAPTER 1: CORONARY ARTERY CALCIUM AND CARDIOVASCULAR RISK PREDICTION ..... | 26  |
| CHAPTER 2: LIPOPROTEIN A AND CARDIOVASCULAR RISK PREDICTION.....            | 38  |
| CHAPTER 3: APOLIPOPROTEIN B AND CARDIOVASCULAR RISK PREDICTION .....        | 55  |
| CHAPTER 4: EXERCISE AND CARDIOVASCULAR DISEASE .....                        | 66  |
| CHAPTER 5: MEDITERRANEAN DIET .....                                         | 81  |
| CHAPTER 6: STATINS IN OLDER ADULTS .....                                    | 88  |
| CHAPTER 7: STATINS AND COGNITION.....                                       | 102 |
| CHAPTER 8A: STATIN INTOLERANCE – RECHALLENGING .....                        | 114 |
| CHAPTER 8B: STATIN INTOLERANCE – OTHER DRUGS .....                          | 122 |
| CHAPTER 9: LIPID TESTING FREQUENCY .....                                    | 132 |
| CHAPTER 10: LIPID TARGETS .....                                             | 137 |

## Introduction and Methods

### INTRODUCTION

This document comprises answers to various clinical questions surrounding the management of cardiovascular disease in a primary care setting. The answers explore nonpharmacological interventions for management of cardiovascular disease, the utility of screening, and treatment in an older adult population.

### METHODS

Each supplemental question was answered using a rapid review process and was assigned to two members of the evidence team for completion. The team drafted questions using the PICO (patient, intervention, comparator, outcome) format, and subsequently performed searches in several medical databases, including Medline, Cochrane, PubMed, and Google Scholar. Due to the varied nature of the supplemental questions, each team tailored their exact search strategy to meet the requirements of their PICO question. For example, questions examining cardiovascular screening focused on screening and diagnostic study designs. Additionally, all teams examined major cardiovascular guidelines published within the previous five years to further identify relevant evidence and examine similar recommendations (**Grundy 2019; Mach 2020; Management of Dyslipidemia for Cardiovascular Risk Reduction Work Group 2020; Pearson 2021; US Preventive Services Task Force 2016; Visseren 2021**). Each unique search strategy is presented in each supplemental question section.

The answers are formatted to contain a bottom-line statement, the evidence and limitations concerning the included studies, the surrounding context, and more detailed methods where needed. Risk of bias assessments (**Higgins 2011; Lee 2022; Shea 2009**), and GRADE evaluations (**Balshem 2011**) for the primary outcome were also completed for each question.

### REFERENCES

- Balshem H, Helfand M, Schunemann HJ, Oxman AD, Kunz R, Brozek J, et al. GRADE guidelines: 3. Rating the quality of evidence. *J Clin Epidemiol* 2011;64(4):401-6.
- Grundy SM, Stone NJ, Bailey AL, Beam C, Birtcher KK, Blumenthal RS, et al. AHA/ACC/AACVPR/AAPA/ABC/ACPM/ADA/AGS/APhA/ASPC/NLA/PCNA Guideline on the Management of Blood Cholesterol: Executive Summary: A Report of the American College of Cardiology/American Heart Association Task Force on Clinical Practice Guidelines. *Circulation*. 2019;139(25):e1046-81.
- Higgins JPT, Altman DG, Gøtzsche PC, Jüni P, Moher D, Oxman AD et al. The Cochrane Collaboration's tool for assessing risk of bias in randomised trials. *BMJ* 2011;343:d5928 doi:10.1136/bmj.d5928
- Lee J, Mulder F, Leeflang M, Wolff R, Whiting P, Bossuyt PM. QUAPAS: An adaption of the QUADAS-2 tool to assess prognostic accuracy studies. *Ann Intern Med*. 2022;175(7):1010-18.
- Mach F, Baigent C, Catapano AL, Koskinas KC, Casula M, Badimon L et al. 2019 ESC/EAS Guidelines for the management of dyslipidaemias: lipid modification to reduce cardiovascular risk. *Eur Heart J*. 2020;41(1):111-188. doi:10.1093/eurheartj/ehz455.



- The Management of Dyslipidemia for Cardiovascular Risk Reduction Work Group. VA/DoD clinical practice guideline for the management of dyslipidemia for cardiovascular risk reduction. US Department of Veterans Affairs, Department of Defense. 2020. 127 p.
- Pearson GJ, Thanassoulis G, Anderson TJ, Barry AR, Couture P, Dayan N et al. Canadian Cardiovascular Society Guidelines for the management of dyslipidemia for the prevention of cardiovascular disease in adults. *Can J Cardiol.* 2021;37(8):1129-50.
- Shea BJ, Hamel C, Wells GA, Bouter LM, Kristjansson E, Grimshaw J, et al. AMSTAR is a reliable and valid measurement tool to assess the methodological quality of systematic reviews. *J Clin Epidemiol* 2009;62(10):1013-20.
- US Preventive Services Task Force. Statin use for the primary prevention of cardiovascular disease in adults. US preventive services task force recommendation statement. *JAMA.* 2016;316(19):1997-2007.
- Visseren FL, Mach F, Smulders YM, Carballo D, Koskinas KC, Bäck M et al. ESC Guidelines on cardiovascular disease prevention in clinical practice: Developed by the Task Force for cardiovascular disease prevention in clinical practice with representatives of the European Society of Cardiology and 12 medical societies With the special contribution of the European Association of Preventive Cardiology (EAPC). *Eur Heart J.* 2021;42(34):3227-337.

## **CHAPTER 1: CORONARY ARTERY CALCIUM AND CARDIOVASCULAR RISK PREDICTION**

### **CLINICAL QUESTION**

1. In patients without established cardiovascular disease, does the use of coronary artery calcium scores change cardiovascular disease risk estimation meaningfully more than standard risk estimates (e.g., age, smoking) alone?
2. In patients without established cardiovascular disease, how does risk estimation with coronary artery calcium scores compare to risk estimates using standard risk factors (e.g., age, smoking)?

### **BOTTOM LINE**

Adding coronary artery calcium (CAC) to cardiovascular (CV) risk assessment likely leads to a small increase in c-statistics of ~0.04, with unclear clinical significance. On its own, CAC for CV risk assessment has acceptable discrimination (c-statistics ~0.77 for CV events) and is likely comparable to other CV risk assessment tools such as the Framingham risk score (FRS) based on low quality evidence. Randomized controlled trials (RCTs) are ongoing to compare the effects of screening with CAC or CV risk factor assessment on hard cardiovascular disease (CVD) endpoints.

### **EVIDENCE**

Quality assessment and summary data of included studies can be found in *Tables 1A-C* and *Tables 2A-C*. GRADE certainty of evidence evaluation can be found in *Tables 3A-B*.

#### *CAC added to traditional risk factors for CV risk assessment: discrimination*

See *Tables 1A-C* for quality assessment and summary of systematic reviews (SRs)

- **Bell 2022**: meta-analysis of six cohort studies (N = 17,961)
  - For Framingham Risk Score, pooled cohort equation, or risk factors:
    - C-statistic range: 0.69-0.80
    - 0 out of 6 studies had c-statistic > 0.8
  - For CAC added to the above risk factor assessments:
    - C-statistic range: 0.73-0.85
    - 2 out of 5 studies had c-statistic > 0.8, one not reported
  - Pooled gain in c-statistic: 0.036 (95% confidence interval [CI] 0.020 to 0.052)
- Four SRs of 3-9 cohort studies, including one study published twice (**Peters 2012a, Peters 2012b, Lin 2018, Aparicio 2021**):
  - Median change in c-statistic for each SR ranged from: 0.04-0.05.

#### *CAC as a stand-alone score for CV risk assessment: discrimination*

See *Tables 2A-C* for quality assessment and summary of observational studies.

- No SRs, five cohort studies identified
  - CV outcomes, 4 cohort studies (N = 1,912-66,636) (**Nakanishi 2021, Dzaye 2020, Geisel 2017, Commandeur 2020**)
    - Median area-under-the-curve (AUC): 0.77 (interquartile range 0.70-0.79)

- Heterogeneity due to outcomes and cohort studied
  - All-cause mortality, 2 cohort studies (N = 4,915-54,678) (**Dzaye 2020, Han 2020**)
    - Median AUC: 0.68
- Three studies provided the AUC of CAC alone compared to a CV risk assessment (no statistics provided; see table below for details)

| Study           | Outcome                         | AUC for CAC | AUC for CV risk assessment |
|-----------------|---------------------------------|-------------|----------------------------|
| Nakanishi 2021  | 10-year CVD death               | 0.78        | ASCVD: 0.82                |
| Geisel 2017     | 10-year MACE                    | 0.70        | FRS: 0.69                  |
| Commandeur 2020 | 15-year MI and/or cardiac death | 0.77        | ASCVD: 0.77                |

ASCVD = atherosclerotic cardiovascular disease; AUC = area under the curve; CVD = cardiovascular disease; FRS = Framingham risk score; MACE = major adverse cardiovascular events; MI = myocardial infarction

### CAC with extensive screening versus standard of care: indirect RCT evidence

- DANCAVAS RCT (**Lindholt 2022**): 46,611 men (mean age 69 years) randomized to comprehensive CV screening with treatment recommendations versus standard of care
  - Screening included assessment of CAC score to identify scores greater than sex/age median; screening for atrial fibrillation, aortic and iliac aneurysms, diabetes, and hyperlipidemia; ankle-brachial index and blood pressure measurements
  - At 5.6 years:
    - Mortality: 12.6% versus 13.1% (control) (Hazard Ratio [HR] 0.90, 95% CI 0.90 to 1.00)
    - Stroke: 7% versus 7.5% (control) (HR 0.93, 95% CI 0.86 to 0.99)
    - Acute myocardial infarction: 2.6% versus 2.8% (control) (HR 0.91, 95% CI 0.81 to 1.03)

## CONTEXT

The Astronaut Cardiovascular Health and Risk Modification (Astro-CHARM) is an example of a calculator that incorporates traditional risk factor information with CAC score to provide an individual's estimated 10-year risk of CVD events <https://astrocharm.org/calculator-working/>.

### Discrimination

Discrimination is defined as the ability to identify individuals who will have an event, and can be assessed with AUC (which is equivalent to the c-statistic). A c-statistic value of 1.00 is perfect, 0.8 is good, 0.6-0.7 is acceptable, and 0.5 is similar to chance (**Allan 2014**). A change in the c-statistic of  $\geq 0.1$  is large, 0.05-0.1 is moderate, 0.025-0.05 is small, and  $< 0.025$  is very small (**Lin 2018**).

### Ongoing RCTs

- **CorCal**: randomized 9,000 patients (primary prevention) to screening with CV risk factors (using Pooled Cohort Equation) or CAC, with recommendations made to the physician (**Muhlestein 2022**). Estimated completion 2024 (**Greenland 2022**).

- **ROBINSICA**: randomized 43,447 patients (high risk primary prevention) to screening with CV risk factors (using SCORE calculator) or CAC (with recommendations made to the physician), or care as usual (finished enrolment in 2021, only behavioural outcomes published so far) (**Denissen 2019**). Final results expected in 2023 (**Vonder 2020**).

#### Radiation and CT examination

Radiation exposure per CT examination is low: 1-2 millisievert (**Lin 2018, Nasir 2022**). One millisievert is similar to that of bilateral mammogram or transatlantic flight (**Nasir 2022**).

#### Major guideline recommendations

Recent guidelines recommendations vary from no specific recommendations to using CAC in selected intermediate- or low-risk individuals. See Appendix *Table 4* for a summary of CV guideline recommendations for CAC screening.

#### REFERENCES

- Allan GM, Garrison S, McCormack J. Comparison of cardiovascular disease risk calculators. *Curr Opin Lipidol.* 2014;25(4):254-265.
- Aparicio REA, Ball J, Yiallourou S, Venkataraman P, Marwick T, Carrington MJ. Imaging-guided evaluation of subclinical atherosclerosis to enhance cardiovascular risk prediction in asymptomatic low-to-intermediate risk individuals: a systematic review. *Prev Med.* 2021;153:106819.
- Bell KJL, White S, Hassan O, Zhu L, Scott AM, Clark J, et al. Evaluation of the incremental value of a coronary artery calcium score beyond traditional cardiovascular risk assessment: a systematic review and meta-analysis. *JAMA Intern Med.* 2022;182(6):634-642.
- Commandeur F, Slomka PJ, Goeller M, Chen X, Cadet S, Razipour A, et al. Machine learning to predict the long-term risk of myocardial infarction and cardiac death based on clinical risk, coronary calcium, and epicardial adipose tissue: a prospective study. *Cardiovasc Rew.* 2020;116:2216-2225.
- Denissen SJ, van der Aalst CM, Vonder M, Oudkerk M, de Koning HJ. Impact of a cardiovascular disease risk screening result on preventive behaviour in asymptomatic participants of the ROBINSICA trial. *Eur J Prev Cardiol.* 2019;26(12):1313-1322.
- Dzaye O, Dudum R, Mirbolouk M, Orimoloye OA, Albert D Osei AD. Validation of the Coronary Artery Calcium Data and Reporting System (CAC-DRS): Dual importance of CAC score and CAC distribution from the Coronary Artery Calcium (CAC) consortium. *J Cardiovasc Comput Tomogr.* 2020;14(1):12-17.
- Geisel MH, Bauer M, Hennig F, Hoffmann B, Nils Lehmann N., Comparison of coronary artery calcification, carotid intima-media thickness and ankle-brachial index for predicting 10-year incident cardiovascular events in the general population. *Eur Heart J.* 2017 Jun 14;38(23):1815-1822.
- Greenland P, Polonsky TS. 40 Years of Research on Coronary Artery Calcium and Still No Convincing Clinical Trials? *JACC: Cardiovascular Imaging* 2022; 15(5): 856-858.
- Grundy SM, Stone NJ, Bailey AL, et al. 2018  
AHA/ACC/AACVPR/AAPA/ABC/ACPM/ADA/AGS/APhA/ASPC/NLA/PCNA guideline on the

management of blood cholesterol: a report of the American College of Cardiology/American Heart Association Task Force on Clinical Practice Guidelines. *Circulation*. 2019;139:e1082-e1143. doi: 10.1161/CIR.0000000000000625

- Han DH, Kolli KK, Gransar H, Lee JH, Choi SY, Chun EJ, et al. Machine learning based risk prediction model for asymptomatic individuals who underwent coronary artery calcium score: comparison with traditional risk prediction approaches. *J Cardiovasc Computed Tomography*. 2020;14:168-176.
- Lin JS, Evans CV, Johnson E, Redmond N, Coppola EL, Smith N. Nontraditional risk factors in cardiovascular disease risk assessment: updated evidence report and systematic review for the US Preventive Services Task Force. *JAMA*. 2018;320:281297.
- Lindholt JS, Søgaard R, Rasmussen LM, Mejldal A, Lambrechtsen J, et al., Five-year outcomes of the Danish Cardiovascular Screening (DANCAVAS) trial. *N Engl J Med*. 2022;387(15):1385-1394.
- Mach F, Baigent C, Catapano AL, Koskinas KC, Casula M, Badimon L et al. 2019 ESC/EAS Guidelines for the management of dyslipidaemias: lipid modification to reduce cardiovascular risk. *Eur Heart J*. 2020;41(1):111-188. doi: 10.1093/eurheartj/ehz455.
- The Management of Dyslipidemia for Cardiovascular Risk Reduction Work Group. VA/DoD clinical practice guideline for the management of dyslipidemia for cardiovascular risk reduction. US Department of Veterans Affairs, Department of Defense. 2020. 127 p.
- Muhlestein JB, Knowlton KU, Le VT, Lappe DKL, May HT, et al. Coronary artery calcium versus pooled cohort equations score for primary prevention guidance: randomized feasibility trial. *JACC Cardiovasc Imaging*. 2022;15(5):843-855.
- Nakanishi R, Slomka PJ, Rios R, Betancur J, Blaha MJ. Machine learning adds to clinical and CAC assessments in predicting 10-year CHD and CVD deaths. *JACC Cardiovasc Imaging*. 2021;14(3):615-625.
- Nasir K, Cainzos-Achirica M. Role of coronary artery calcium score in the primary prevention of cardiovascular disease. *BMJ*. 2021;372:n776.
- Pearson GJ, Thanassoulis G, Anderson TJ, et al. 2021 Canadian Cardiovascular Society guidelines for the management of dyslipidemia for the prevention of cardiovascular disease in adults. *Can J Cardiol*. 2021;37:1129-1150.
- Peters SA, Bakker M, den Ruijter HM, Bots ML. Added value of CAC in risk stratification for cardiovascular events: a systematic review. *Eur J Clin Invest*. 2012;42(1):110-6. (a)
- Peters SA, den Ruijter HM, Bots ML, Moons KG. Improvements in risk stratification for the occurrence of cardiovascular disease by imaging subclinical atherosclerosis: a systematic review. *Heart*. 2012;98:177184. (b)
- Tramontano L, Punzo B, Clemente A, Seitun S, Saba L, Bossone E, et al. Prognostic value of coronary calcium score in asymptomatic individuals: a systematic review. *J Clin Med*. 2022;11(19):5842.
- US Preventive Services Task Force. Statin use for the primary prevention of cardiovascular disease in adults US Preventive Services Task Force recommendation statement. *JAMA*. 2022;328(8):746-753. doi:10.1001/jama.2022.13044
- Visseren FL, Mach F, Smulders YM, Carballo D, Koskinas KC, Böck M et al. ESC Guidelines on cardiovascular disease prevention in clinical practice: Developed by the Task Force

for cardiovascular disease prevention in clinical practice with representatives of the European Society of Cardiology and 12 medical societies With the special contribution of the European Association of Preventive Cardiology (EAPC). Eur Heart J. 2021;42(34):3227-337.

- Vonder M, van der Aalst CM, de Koning HJ. Coronary artery calcium scoring in individuals at risk for coronary artery disease: current status and future perspectives. Br J Radiology. 2020;93:1113.

## METHODS

- 105 references identified from guidelines related to CAC (**Arnett 2019, Grundy 2018, Lin 2018, Mach 2020, Management of Dyslipidemia for Cardiovascular Risk Reduction Work Group 2020, Pearson 2021, UPSTF 2022, Visseren 2021**).
- Duplicates removed: 91 references
- Titles and abstract +/- full text screened for RCT / Systematic Reviews (SR): 10 references
- Forward searched all 10 references with Google Scholar (used first 10 pages), restricted to trial OR “systematic review” if more than 10 pages – Sep 26, 2022: 28 references
- Searched PubMed for “Coronary Calcium Score” with filter: last 5 years, RCT and systematic review: 2 additional references Sep 28, 2022
- Searched Google scholar for “AUC” “CAC” “systematic review” – screened title / abstract +/- full text for cohort / SR – Nov 03, 2022. Identified **Tramontano 2022** (SR looking at the prognostic value of CAC)
- Backward reference searched **Tramontano 2022** to identify articles reporting AUC for CAC only using cohort > 1000 patients: 6 references
- Duplicate search done on November 30, 2022:
  - Pubmed: using terms “coronary artery calcium,” “AUC,” “area under the curve,” “coronary calcium” and filtered to clinical study, systematic review, meta-analysis or clinical trial.
  - Google scholar: using advanced search with terms “AUC”, “coronary artery calcium,” “trial,” “study.”

Search results 27; removal of duplicates yielded two additional citations.

## APPENDIX

*Table 1A: Quality assessment of systematic reviews assessing discrimination of coronary artery calcium added to traditional risk factors for cardiovascular risk assessment using AMSTAR-2*

| Study              | AMSTAR-2 rating | Critical weakness                                                                     |
|--------------------|-----------------|---------------------------------------------------------------------------------------|
| Bell 2022          | Low             | No explicit mention pre-specification of protocol                                     |
| Peters 2012a and b | Critically low  | No explicit mention pre-specification of protocol; no comprehensive literature search |
| Lin 2018           | Moderate        | More than one non-critical weakness                                                   |
| Aparicio 2021      | Low             | No explicit mention pre-specification of protocol                                     |

AMSTAR-2 = Assessment of Multiple Systematic Reviews

*Table 1B: Summary of systematic reviews characteristics assessing discrimination of coronary artery calcium added to traditional risk factors for cardiovascular risk assessment*

| Study                         | No. observational studies | No. patients                 | Population                | Mean age (range, years) | % women    | Mean follow-up (years) |
|-------------------------------|---------------------------|------------------------------|---------------------------|-------------------------|------------|------------------------|
| Bell 2022                     | 6                         | 17,961<br>(Range: 470-5,185) | Primary prevention        | 50-75                   | 38.4-59.4% | 4.4-10.3               |
| Peters 2012a and Peters 2012b | 9                         | Range: 676-6,722             | Primary prevention, no DM | 52-70                   | 10-69%     | 2.7-9.2                |
| Lin 2018                      | 18                        | 60,486<br>(Range: 946-7,772) | Primary prevention        | NA                      | NA         | NA                     |
| Aparicio 2021                 | 6                         | Range: 274-6,500             | Primary prevention        | 41.7-68.9               | 47.8-56%   | 9-13                   |

DM = diabetes mellitus; NA = not applicable

**Table 1C: Summary of systematic review results assessing discrimination of coronary artery calcium added to traditional risk factors for cardiovascular risk assessment\***

| Study                           | No. studies | Outcome                                                      | Base model description    | Base model: C-statistic | Model with CAC: C-statistic | Change in C-statistic median (IQR) |
|---------------------------------|-------------|--------------------------------------------------------------|---------------------------|-------------------------|-----------------------------|------------------------------------|
| Bell 2022                       | 6           | CVD and CHD                                                  | FRS, PCE, or risk factors | 0.693-0.80              | 0.731-0.851                 | 0.036 (0.02-0.05)                  |
| Peters 2012a (and Peters 2012b) | 9           | Fatal and non-fatal CHD or CVD                               | FRS or risk factors       | 0.30-0.79               | 0.69-0.86                   | 0.05 (0.04-0.07)                   |
| Lin 2018                        | 5           | “Hard” CHD or “Hard” CVD                                     | FRS                       | 0.63-0.76               | 0.68-0.834                  | 0.05 (0.04-0.07)                   |
| Aparicio 2021                   | 3           | MACE, ischemic coronary events, stroke, sudden cardiac death | FRS or risk factors       | 0.66-0.75               | 0.76-0.77                   | 0.04 (0.01-0.05)                   |

\*When extracting data where multiple endpoints were available, we chose all participants, “major” over “any” endpoints, “hard” over “total” or “soft” endpoints, and FRS over ATP III.

ATP III = Adult Treatment Panel III; CAC = coronary artery calcium; CHD = coronary heart disease; CVD = cardiovascular disease; FRS = Framingham risk score; IQR = interquartile range; MACE = major adverse cardiovascular events; PCE = pooled cohort equation

**Table 2A: Quality assessment of cohort studies assessing discrimination of coronary artery calcium alone for cardiovascular risk assessment using QUAPAS**

| Study           | Participants | Index test | Outcome | Flow and timing | Analysis |
|-----------------|--------------|------------|---------|-----------------|----------|
| Dzaye 2020      | Low          | Low        | Low     | Low             | Unclear  |
| Nakanishi 2021  | Low          | Low        | Low     | Low             | Unclear  |
| Geisel 2017     | Low          | Low        | Low     | Unclear         | Unclear  |
| Commandeur 2020 | Low          | Low        | Low     | High            | High     |
| Han 2020        | Unclear      | Low        | Low     | High            | Unclear  |

QUAPAS = Quality Assessment of Prognostic Accuracy Studies



**Table 2B: Summary of cohort study characteristics assessing discrimination of coronary artery calcium alone for cardiovascular risk assessment**

| Study           | Design                 | No. patients | Population         | Mean age (years) | % Women | Median follow-up (years) | Comparisons/comments                                                    |
|-----------------|------------------------|--------------|--------------------|------------------|---------|--------------------------|-------------------------------------------------------------------------|
| Dzaye 2020      | Cohort (retrospective) | 54,678       | Primary prevention | 54.2             | 34.4%   | 11.7                     | “CAC-Data and Reporting System” vs standard CAC scores                  |
| Nakanishi 2021  | Cohort (retrospective) | 66,636       | Primary prevention | 54               | 33%     | 10                       | Machine Learning vs ASCVD assessment vs CAC scores                      |
| Geisel 2017     | Cohort (prospective)   | 4,814        | Primary prevention | 59.2             | 53%     | 10.3                     | CAC vs FRS vs FRS+CAC                                                   |
| Commandeur 2020 | Cohort (prospective)   | 1,912        | Primary prevention | 55.8             | 41.6%   | 14.5                     | Machine Learning vs ASCVD risk vs CAC                                   |
| Han 2020        | Cohort (retrospective) | 4,915        | Primary prevention | 54.9             | 33%     | 5.4                      | CAC vs FRS+CAC vs ASCVD+ CAC vs Machine Learning; used validation model |

ASCVD = atherosclerotic cardiovascular disease; CAC = coronary artery calcium; FRS = Framingham risk score

**Table 2C: Summary of cohort study results assessing discrimination of coronary artery calcium alone for cardiovascular risk assessment**

| Study          | C-statistic/AUC CVD death | C-statistic/AUC CHD death | C-statistic/AUC All-cause mortality | C-statistic/AUC Composite outcome | Notes |
|----------------|---------------------------|---------------------------|-------------------------------------|-----------------------------------|-------|
| Nakanishi 2021 | 0.781 (ASCVD: 0.821)      | 0.816 (ASCVD: 0.834)      | NA                                  | NA                                |       |
| Dzaye 2020     | 0.754                     | 0.785                     | 0.696                               | NA                                |       |

| Study           | C-statistic/AUC<br>CVD death | C-statistic/AUC<br>CHD death | C-statistic/AUC<br>All-cause mortality | C-statistic/AUC<br>Composite<br>outcome | Notes                                                           |
|-----------------|------------------------------|------------------------------|----------------------------------------|-----------------------------------------|-----------------------------------------------------------------|
| Geisel 2017     | NA                           | NA                           | NA                                     | 0.703<br>(FRS: 0.693)                   | Composite outcome: incident coronary events, stroke or CV death |
| Commandeur 2020 | NA                           | NA                           | NA                                     | 0.77<br>(ASCVD: 0.77)                   | Composite outcome: MI and/or cardiac death                      |
| Han 2020        | NA                           | NA                           | 0.67                                   | NA                                      |                                                                 |

ASCVD = atherosclerotic cardiovascular disease; AUC = area under the curve; CHD = coronary heart disease; CV = cardiovascular; CVD = cardiovascular disease; FRS = Framingham risk score; MI = myocardial infarction; NA = not applicable

**Table 3A: GRADE certainty of evidence for CAC added to risk factors to calculate risk of MACE**

**Prognostic factor:** CAC added to risk calculator

**Outcome:** MACE

| Study design | No. studies (no. patients) | Risk of bias | Inconsistency | Indirectness                                                                                                                | Imprecision | Publication bias | Large effect | Plausible confounding | Dose-response gradient | Effect estimate (range)  | Certainty                                                                                     |
|--------------|----------------------------|--------------|---------------|-----------------------------------------------------------------------------------------------------------------------------|-------------|------------------|--------------|-----------------------|------------------------|--------------------------|-----------------------------------------------------------------------------------------------|
| SR*          | 4 (274-7,772)              | Not serious  | Not serious   | Serious<br><br>Study populations and outcomes correspond to targeted population. However, various definitions of MACE used. | Not serious | Not detected     | No           | No                    | No                     | Median C-stat. 0.73-0.85 | Moderate<br><br>This outcome has one serious (-1) therefore <b>downgrade by 1 to moderate</b> |

\*SR of observational studies (primarily cohort)

†Primary prevention studies with broad eligibility criteria

CAC = coronary artery calcium; GRADE = Grading of Recommendations, Assessment, Development, and Evaluations; MACE = major adverse cardiovascular events; SR = systematic review

**Table 3B: GRADE certainty of evidence for use of CAC alone to calculate risk of MACE**

**Prognostic factor:** CAC score on its own

**Outcome:** MACE

| Study design | No. studies (no. patients) | Risk of bias                                                                                                | Inconsistency | Indirectness                                                                                                                | Imprecision | Publication bias | Large effect | Plausible confounding | Dose-response gradient | Effect estimate (range) | Certainty                                                                           |
|--------------|----------------------------|-------------------------------------------------------------------------------------------------------------|---------------|-----------------------------------------------------------------------------------------------------------------------------|-------------|------------------|--------------|-----------------------|------------------------|-------------------------|-------------------------------------------------------------------------------------|
| Cohort       | 2 (6,726)                  | Serious<br><br>Primary prevention studies with mostly broad eligibility criteria (1 long-term FU of an RCT) | Not serious   | Serious<br><br>Study populations and outcomes correspond to targeted population; however, various definitions of MACE used. | Not serious | Not detected     | No           | No                    | No                     | C-stat. 0.703 and 0.77  | Low<br><br>This outcome has two serious (-2) therefore <b>downgrade by 2 to low</b> |

\*SR of observational studies (primarily cohort)

†Primary prevention studies with broad eligibility criteria

CAC = coronary artery calcium; FU = follow-up; GRADE = Grading of Recommendations, Assessment, Development, and Evaluations; MACE = major adverse cardiovascular events; RCT = randomized controlled trial

**Table 4: Summary of recommendations from major guidelines published within the past 5 years**

| Our question                                                                                                                                                                                                                                                                                                                                  | 2018 AHA <sup>1</sup>                                                                                                                                                                                                                                                                                                                                                                                                                                                                                                                                                                                           | 2019 ESC Dyslipidemia <sup>2</sup>                                                                                                                                    | 2020 VA <sup>3</sup>                                                                                                                                                         | 2021 CCS <sup>4</sup>                                                                                                                                                                                                                                                                                                                                                                                                                                                                                                                                                                                       | 2021 ESC CVD Prevention <sup>5</sup>                                                                        | 2022 USPSTF <sup>6</sup>            |
|-----------------------------------------------------------------------------------------------------------------------------------------------------------------------------------------------------------------------------------------------------------------------------------------------------------------------------------------------|-----------------------------------------------------------------------------------------------------------------------------------------------------------------------------------------------------------------------------------------------------------------------------------------------------------------------------------------------------------------------------------------------------------------------------------------------------------------------------------------------------------------------------------------------------------------------------------------------------------------|-----------------------------------------------------------------------------------------------------------------------------------------------------------------------|------------------------------------------------------------------------------------------------------------------------------------------------------------------------------|-------------------------------------------------------------------------------------------------------------------------------------------------------------------------------------------------------------------------------------------------------------------------------------------------------------------------------------------------------------------------------------------------------------------------------------------------------------------------------------------------------------------------------------------------------------------------------------------------------------|-------------------------------------------------------------------------------------------------------------|-------------------------------------|
| <p>In patients without established CVD, does the use of CAC scores change CVD risk estimation meaningfully more than standard risk estimates (e.g., age, smoking) alone?</p> <p>In patients without established CVD, how does risk estimation with CAC scores compare to risk estimates using standard risk factors (e.g., age, smoking)?</p> | <p>“In intermediate-risk or selected borderline-risk adults, if the decision about statin use remains uncertain, it is reasonable to use a CAC score in the decision to withhold, postpone, or initiate statin therapy.</p> <p>‘Intermediate-risk’ patients defined as having ASCVD risk 7.5%-20%.</p> <p>‘Borderline risk’ adults defined as 10y risk of ASCVD 5-7.5%.</p> <p>In intermediate-risk adults or selected borderline-risk adults in whom a CAC score is measured for the purpose of making a treatment decision, AND CAC score = 0: reasonable to withhold statin therapy and reassess in 5-10</p> | <p>“CAC score assessment with CT may be considered as a risk modifier in the cardiovascular risk assessment of asymptomatic individuals at low or moderate risk.”</p> | <p>Suggest against the routine use of CAC testing.</p> <p>Suggest against the routine use of additional risk markers (including CAC) when assessing cardiovascular risk.</p> | <p>“We suggest that CAC screening using CT imaging might be considered for asymptomatic adults ≥40 years of age and at intermediate risk (FRS 10-19%) for whom treatment decisions are uncertain.</p> <p>We recommend that CAC screening using CT imaging not be undertaken for 1) high-risk individuals; 2) patients receiving statin treatment or 3) most asymptomatic, low-risk adults.</p> <p>We suggest that CAC screening might be considered for a subset of low-risk individuals 40 years of age or older with a family history of premature ASCVD (men ≤ 55y, women ≤ 65 years) in addition to</p> | <p>“CAC scoring may be considered to improve risk classification around treatment decision thresholds.”</p> | <p>No specific recommendations.</p> |

| Our question | 2018 AHA <sup>1</sup>                                                                                                                                                                                                                                                                                                                                                                                                                                                                  | 2019 ESC<br>Dyslipidemia <sup>2</sup> | 2020 VA <sup>3</sup> | 2021 CCS <sup>4</sup>                                                           | 2021 ESC CVD<br>Prevention <sup>5</sup> | 2022 USPSTF <sup>6</sup> |
|--------------|----------------------------------------------------------------------------------------------------------------------------------------------------------------------------------------------------------------------------------------------------------------------------------------------------------------------------------------------------------------------------------------------------------------------------------------------------------------------------------------|---------------------------------------|----------------------|---------------------------------------------------------------------------------|-----------------------------------------|--------------------------|
|              | <p>years, as long as higher risk conditions are absent (e.g. diabetes, family history of premature CHD, cigarette smoking)<br/>CAC score =1-99: reasonable to initiate statin therapy for patients ≥ 55 years old<br/>CAC score &gt;100 (or ≥ 75<sup>th</sup> percentile), reasonable to initiate statin therapy.<br/>For adults 76-80 years of age with LDL 1.7 to 4.8mmol/L: may be reasonable to measure CAC to reclassify those with a score of zero to avoid statin therapy.”</p> |                                       |                      | <p>identifying known genetic causes of ASCVD such as elevated Lp(a) or FH.”</p> |                                         |                          |

<sup>1</sup>Grundy 2018; <sup>2</sup>Mach 2020; <sup>3</sup>Management of Dyslipidemia for Cardiovascular Risk Reduction Work Group 2020; <sup>4</sup>Pearson 2021; <sup>5</sup>Visseren 2021; <sup>6</sup>US Preventive Services Task Force 2022

ASCVD = atherosclerotic cardiovascular disease; CAC = coronary artery calcium; CHD = coronary heart disease; CT = computerized tomography; CVD = cardiovascular disease; FH = familial hypercholesterolemia; FRS = Framingham risk score; LDL = low-density lipoprotein; Lp(a) = lipoprotein A

## **CHAPTER 2: LIPOPROTEIN A AND CARDIOVASCULAR RISK PREDICTION**

### **CLINICAL QUESTION**

In patients without established cardiovascular disease, does the addition of lipoprotein A meaningfully change cardiovascular disease risk estimation compared to standard risk estimates (e.g., age, smoking) alone?

### **BOTTOM LINE**

Adding lipoprotein A (Lp[a]) to current cardiovascular (CV) risk calculators does not meaningfully add to cardiovascular disease (CVD) risk prediction.

### **EVIDENCE**

Since the 2015 PEER guideline (**Allan 2015**), there have been 2 descriptive systematic reviews (SRs) (**Forbes 2016, Kouvari 2019a**) and 11 additional observational studies published (**Agarwala 2016, Delabays 2021, Guertin 2021, Kouvari 2019b, Mehta 2020, Nomikos 2015, Pare 2019, Patel 2021, Verbeek 2017, Welsh 2022, Wilsgaard 2015**). From the 2 SRs, we identified 5 observational studies which met our inclusion criteria (**Pernod 2006, Foscolou 2018, Tunstall-Pedoe 2017, Cao 2017, Waldeyer 2017**). We chose to report these studies individually as “meta-analysis was not possible due to heterogeneity in the CVD outcomes, populations and statistical analysis methods” (**Forbes 2016**) and not all included studies met our criteria. A summary of study characteristics and efficacy data is reported in *Tables 1A-B*. Quality assessment of included studies can be found in *Tables 2A-B*. GRADE certainty of evidence evaluation can be found in *Table 3*. All evidence statistically significant unless noted.

We found Lp(a) risk ratios (RRs)/hazard ratios (HRs)/odds ratios (ORs) to predict CVD ranged from 1.00 to 2.21. In comparison, the RR for non-traditional risk markers like leucocyte count and pro-insulin were 1.45 and 2.23, respectively. These numbers are not dissimilar to the number for Lp(a), or apolipoprotein B (apoB). In one study, **Wilsgaard 2015**, Lp(a) and three other biomarkers (ApoB/ApoA ratio, plasma kallikrein, and matrix metalloproteinase 9) were added to traditional risk factors and found the area under the receiver operator characteristic curve (ROC-AUC) to be 0.027 for 10-year incident myocardial infarction (MI), a change that is likely not clinically meaningful.

Results of 16 observational studies (N = 279-340,339).

- **Welsh 2022**: one of the largest and most relevant cohorts (N = 340,339; UK participants; median 8.9 years) as it met our population inclusion criteria (adults without CVD who were not taking statins) and included results presented in a manner that was more optimal when answering questions about the additive effect of biomarkers (e.g., C-statistics, net reclassification index).
  - ***Incident CVD***: When added to classical risk factors such as age, sex, total cholesterol and high-density-lipoprotein-cholesterol (HDL-C), Lp(a) per 1-standard deviation increase (compared to reference of Lp(a)<20 nmol/L) resulted in a HR of 1.13 (95% CI 1.10 to 1.16), change in C-index of +0.0017 (95% CI 0.0008 to 0.0026), and overall net reclassification index of +0.0112% (95% CI

+0.0039 to +0.0184), all of which are considered very small changes in the c - statistic and unlikely clinically meaningful (**Welsh 2022**)

### Outcomes by Lp(a) cutoffs

- *≤30 mg/dL versus >30 mg/dL*
  - In a cohort of adults aged 22-92 (N = 279), a significant increase in CVD events and CV death was found with higher Lp(a) levels, HR 1.67 (95% CI 1.04 to 2.63) (**Pernod 2006**)
- *<50 mg/dL vs ≥ 50 mg/dL*
  - In a cohort of Swiss adults aged 35-75 (N = 4,829), C-statistic difference = 0.004 between Lp(a) <50 vs ≥50 mg/dL when added to the ESC/SCORE algorithm to predict incident atherosclerotic cardiovascular disease (ASCVD), and overall net reclassification index was 3.3% (95% CI 0.8 to 5.8), both of which were not clinically meaningful (**Delabays 2021**)
  - In the EPIC-Norfolk cohort of adults aged 40-79 (N = 25,663), Lp(a) ≥50 mg/dL was associated with an increase in coronary artery disease (myocardial ischemia, MI, or other ischemic heart disease), HR 1.50 (95% CI 1.38 to 1.64) (**Guertin 2020**)
  - In the ATTICA cohort of healthy adults from Greece (mean age 46; N = 1,890), a significant increase in 10-year CVD event rate was found with Lp(a) ≥50 mg/dL when adjusting for other lipid markers and statins (HR 2.21 [95% CI 1.15 to 4.21])
    - This increase was no longer significant when the cut point was lowered to 30 mg/dL (HR 1.18 [95% CI 0.82 to 1.60]) (**Kouviri 2019b**)
  - In a case control study of the INTERHEART cohort of participants (N = 12,943), a significant increase in MI was reported with Lp(a) ≥50mg/dL, OR 1.48 (95% CI 1.32 to 1.67) (**Pare 2019**)
  - In the EPIC-Norfolk cohort of adults (N = 16,777), the net reclassification index for CVD when Lp(a) ≥50 mg/dL added to ACC/AHA (American College of Cardiology/American Heart Association) traditional risk factors was -2.27% (95% CI not reported)
    - When added to SCORE (Systematic Coronary Risk Evaluation) traditional risk factors, the net reclassification index was 0.53% (95% CI not reported)
    - When the cut point was lowered to 30 mg/dL, Lp(a) added to ACC/AHA resulted in net reclassification index of -2.76% (95% CI not reported) and when added to SCORE, the net reclassification index was 0.57% (95% CI not reported) (**Verbeek 2017**)
- *<70 mg/dL vs ≥70 mg/dL*
  - In a cohort of UK Biobank participants aged 40-69 (N = 460,506), Lp(a) ≥150 nmol/L (~70 mg/dL) was associated with a significant increase in incident ASCVD, HR 1.50 (95% CI 1.44 to 1.56) (**Patel 2021**)
- Although the results above are statistically significant, they are likely not clinically meaningful

### Outcomes by increase in Lp(a) levels

- In a cohort of healthy adults in Greece (N = 3,042), a significant increase in combined incident CVD events was found with Lp(a), per 1 mg/dL increase (HR 1.02 [95% CI 1.01 to 1.04]) (**Foscolou 2018**)
- In a cohort of healthy adults in Scotland (N = 15,737), the HR was not statistically different for coronary heart disease (CHD) with Lp(a), per 3.64 mg/dL increase (HR 1.01 [95% CI 0.97 to 1.05]) (**Tunstall-Pedoe 2017**)
- In the ARIC cohort from USA communities aged 45-64 (N = 8,127), a significant increase in CHD (definite or probable MI or fatal CHD) was found with Lp(a) for 1 unit increment of the log of Lp(a) adjusted for ARIC 10-year CHD score (HR 1.09 [95% CI 1.02 to 1.16])
  - CVD (defined as CHD plus stroke) was not statistically different (**Agarwala 2016**)
- In the ATTICA cohort of adults from Greece (N = 2,583), Lp(a) per 1mg/dL increase was not statistically different for incident CVD (**Nomikos 2015**)
- In a nested case control study, a subset of participants in the 4<sup>th</sup> survey of the Tromsø study (N = 817), an increase in 10-year MI was found with Lp(a), per 1-standard deviation increase (OR 1.26 [95% CI 1.09 to 1.47]) (**Wilsgaard 2015**)

### Outcomes by Lp(a) percentile

- In a cohort of adults in the USA (N = 4,629), an increase in CHD was found when comparing Lp(a) upper versus bottom 25<sup>th</sup> percentiles ( $\geq 39.9$  vs  $<39.9$  mg/dL) (HR 1.49 [95% CI 1.16 to 1.91]) (**Cao 2017**)
  - Similarly, an increase was found in a cohort of adults in Europe (N = 56,804) when comparing the 90<sup>th</sup> percentile ( $\geq 43.5$  mg/dL) to the 33<sup>rd</sup> percentile ( $< 5.3$  mg/dL) (HR 1.49 [95% CI 1.29 to 1.73]) (**Waldeyer 2017**)
- In a cohort of participants from the EPIC-Norfolk study aged 40-79 years (N = 25,663), an increase in coronary artery disease was found when comparing the highest ( $>69.7$  mg/dL) to the lowest quintile ( $\leq 11.4$  mg/dL) (HR 1.61 [95% CI 1.42 to 1.84]) (**Guertin 2020**)
- In the ARIC and DHS cohorts of participants without CVD (N = 12,149 and 2,756, respectively), an increase was found for ASCVD in the ARIC cohort when comparing quintile 5 to quintiles 1 to 4 (HR 1.25 [95% CI 1.12 to 1.40]) but no statistical difference was found in the DHS cohort (HR 1.64 [95% CI 0.96 to 2.80])
  - A significant increase was seen in CHD in the ARIC cohort with the same quintile comparison (HR 1.27 [95% CI 1.12 to 1.45]) (**Mehta 2020**)
- Although most of the results above are statistically significant, they are likely not clinically meaningful

### Limitations

Limitations in evidence are profound and similar to those found in the 2015 PEER Guideline.

- Studies are heterogeneous in that:
  - Authors used multiple techniques to classify Lp(a) risk groups including various Lp(a) cut-off levels, quartiles, quintiles, and by standard deviation or mg/dL increase



- Analysis of the Lp(a) risk groups also varied considerably including comparing highest quintiles to the lower 4 quintiles which will give smaller association effects or highest versus lowest (example 1<sup>st</sup> quartile to 4<sup>th</sup> quartile) which can give larger association effects
- Methods of reporting the association effect size included ORs, HRs, ROC-AUC (c-statistic), and net classification index
- It is possible the apparent effect is larger than the real effect as publication bias appears to be common among CV biomarker studies (**Nissen 2013**)

## CONTEXT

The argument that the measurement of Lp(a) may help identify unique individuals previously not identified as higher risk (example 5%-7.5% or 7.5%-19%) could be made for any risk factor. As noted in the 2015 PEER Simplified Lipid Guideline (**Allan 2015**), there are scores of risk factors with statistically significant associations. Any individual test could identify unique individuals not picked by traditional assessments, but which is the preferred test or tests (Lp[a] or apoB, homocysteine, leukocyte count, pro-insulin, etc.) and what is the benefit (people identified and adverse CV events prevented) compared to the harms (cost and inconvenience of testing, overdiagnosis, harms of interventions, false reassurance, etc.)? There are too many uncertainties that add complexity to risk estimation in primary care.

### Discrimination

Discrimination is defined as the ability to identify individuals who will have an event, and can be assessed with AUC (which is equivalent to the c-statistic). A c-statistic value of 1.00 is perfect, 0.8 is good, 0.6-0.7 is acceptable, and 0.5 is similar to chance (**Allan 2014**). A change in the c-statistic of  $\geq 0.1$  is large, 0.05-0.1 is moderate, 0.025-0.05 is small, and  $< 0.025$  is very small (**Lin 2018**).

### Major guideline recommendations

The 2018 American Heart Association guideline (**Grundty 2018**) suggests an Lp(a) level  $\geq 50$  mg/dL (125-nmol/L) can be considered a “risk-enhancing” factor that favors the initiation of a statin in adults aged 40 to 75 years, without diabetes mellitus, and who have a 10-year CVD risk of 7.5% to 19.9%. They suggest the same “risk-enhancing” factor may favor statin therapy in patients at 10-year risk of 5% to 7.5%. No data is provided to quantify the increased risk attributed to a Lp(a) value  $\geq 50$  mg/dL. The 2019 European Society of Cardiology (ESC) dyslipidemia guideline (**Mach 2020**) and the 2021 Canadian Cardiovascular Society guideline (**Pearson 2021**) both recommend a single Lp(a) measurement in each adult person’s lifetime to identify those with genetically high Lp(a) levels. The 2019 ESC guideline goes on to recommend Lp(a) level be considered in patients with a family history of premature CVD and for reclassification in patients who are borderline between moderate and high-risk CVD. No evidence is provided regarding the potential increase in CVD risk.

The 2020 Veteran’s Affairs (VA) guideline (**Management of Dyslipidemia for Cardiovascular Risk Reduction Work Group 2020**) suggests against the routine use of additional markers in

assessing CVD risk, while the 2021 ESC CVD (**Visseren 2021**) prevention guideline and the 2022 United States Preventive Services Task Force (**US Preventive Services Task Force 2022**) guideline provide no recommendations on the measurement of Lp(a) levels. A summary of these guideline recommendations can be found in *Table 4*.

## REFERENCES

- Agarwala A, Virani S, Couper D, Chambless L, Boerwinkle E, Astor BC, et al. Biomarkers and degree of atherosclerosis are independently associated with incident atherosclerotic cardiovascular disease in a primary prevention cohort: the ARIC study. *Atherosclerosis*. 2016;253:156-163.
- Allan GM, Garrison S, McCormack J. Comparison of cardiovascular disease risk calculators. *Curr Opin Lipidol*. 2014;25(4):254-65.
- Allan GM, Lindblad AJ, Comeau A, Coppola J, Hudson B, Mannarino M, et al. Simplified lipid guidelines: prevention and management of cardiovascular disease in primary care. *Can Fam Physician*. 2015;61(10):857-67.
- Authors/Task Force Members; ESC Committee for Practice Guidelines (CPG); ESC National Cardiac Societies. 2019 ESC/EAS guidelines for the management of dyslipidaemias: lipid modification to reduce cardiovascular risk. *Atherosclerosis*. 2019;290:140-205.
- Cao J, Steffen BT, Guan W, et al. Evaluation of lipoprotein(a) electrophoretic and immunoassay methods in discriminating risk of calcific aortic valve disease and incident coronary heart disease: the multi-ethnic study of atherosclerosis. *Clin Chem*. 2017; 63:1705–1713.
- Delabays B, Marques-Vidal P, Kronenberg F, Waeber G, Vollenweider P, Vaucher J. Use of lipoprotein(a) for refining cardiovascular risk prediction in a low-risk population: the CoLaus/PsyCoLaus study. *Eur J Prev Cardiol*. 2021;28(8):e18-e20.
- Forbes CA, Quek RG, Deshpande S, Worthy G, Wolff R, Stirk L, et al. The relationship between Lp(a) and CVD outcomes: a systematic review. *Lipids Health Dis*. 2016;15:95.
- Foscolou A, Georgousopoulou E, Magriplis E, et al. The mediating role of Mediterranean diet on the association between Lp(a) levels and cardiovascular disease risk: a 10-year follow-up of the ATTICA study. *Clin Biochem*. 2018;60:33–37.
- Grundy SM, Stone NJ, Bailey AL, Beam C, Birtcher KK, Blumenthal RS, et al. 2018 AHA/ACC/AACVPR/AAPA/ABC/ACPM/ADA/AGS/APhA/ASPC/NLA/PCNA guideline on the management of blood cholesterol: a report of the American College of Cardiology/American Heart Association Task Force on Clinical Practice Guidelines. *Circulation*. 2019;139(25):e1082-e1143.
- Guertin J, Kaiser Y, Manikpurage H, Perrot N, Bourgeois R, Couture C, et al. Sex-specific associations of genetically predicted circulating Lp(a) (lipoprotein(a)) and hepatic LPA gene expression levels with cardiovascular outcomes: Mendelian randomization and observational analyses. *Circ Genom Precis Med*. 2021;14(4):e003271.
- Kouvari M, Panagiotakos DB. The role of lipoprotein (a) in primary and secondary cardiovascular disease prevention: a systematic review of epidemiological studies. *Curr Opin Cardiol*. 2019;34(4):424-434(a).

- Kouvari M, Panagiotakos DB, Chrysohoou C, Georgousopoulou EN, Yannakoulia M, Tousoulis D, et al. Lipoprotein (a) and 10-year cardiovascular disease incidence in apparently healthy individuals: a sex-based sensitivity analysis from ATTICA cohort study. *Angiology*. 2019;70(9):819-829(b).
- Lin JS, Evans CV, Johnson E, Redmond N, Coppola EL, Smith N. Nontraditional risk factors in cardiovascular disease risk assessment: updated evidence report and systematic review for the US Preventive Services Task Force. *JAMA*. 2018;320:281297.
- Mach F, Baigent C, Catapano AL, Koskinas KC, Casula M, Badimon L et al. 2019 ESC/EAS Guidelines for the management of dyslipidaemias: lipid modification to reduce cardiovascular risk. *Eur Heart J*. 2020;41(1):111-188. doi: 10.1093/eurheartj/ehz455.
- The Management of Dyslipidemia for Cardiovascular Risk Reduction Work Group. VA/DoD clinical practice guideline for the management of dyslipidemia for cardiovascular risk reduction. US Department of Veterans Affairs, Department of Defense. 2020. 127 p.
- Mehta A, Virani SS, Ayers CR, Sun W, Hoogeveen RC, Rohatgi A, et al. Lipoprotein(a) and family history predict cardiovascular disease risk. *J Am Coll Cardiol*. 2020;76(7):781-793.
- Nissen SE. Biomarkers in cardiovascular medicine: the shame of publication bias. *JAMA Intern Med*. 2013;173(8):671-2. doi: 10.1001/jamainternmed.2013.4074.
- Nomikos T, Panagiotakos D, Georgousopoulou E, Metaxa V, Chrysohoou C, Skoumas I, et al. Hierarchical modelling of blood lipids' profile and 10-year (2002-2012) all cause mortality and incidence of cardiovascular disease: the ATTICA study. *Lipids Health Dis*. 2015;14:108.
- Paré G, Çaku A, McQueen M, Anand SS, Enas E, Clarke R, et al. Lipoprotein(a) levels and the risk of myocardial infarction among 7 ethnic groups. *Circulation*. 2019;139(12):1472-1482.
- Patel AP, Wang (汪敏先) M, Pirruccello JP, Ellinor PT, Ng K, Kathiresan S, et al. Lp(a) (lipoprotein[a]) concentrations and incident atherosclerotic cardiovascular disease: new insights from a large national biobank. *Arterioscler Thromb Vasc Biol*. 2021;41(1):465-474.
- Pearson GJ, Thanassoulis G, Anderson TJ, Barry AR, Couture P, Dayan N, et al. 2021 Canadian Cardiovascular Society guidelines for the management of dyslipidemia for the prevention of cardiovascular disease in adults. *Can J Cardiol*. 2021;37:1129-1150.
- Pernod G, Bosson JL, Golshayan D, Barro C, Forneris G, Martina G, et al. Phenotypic and genotypic risk factors for cardiovascular events in an incident dialysis cohort. *Kidney Int*. 2006;69(8):1424–30
- Tunstall-Pedoe H, Peters SAE, Woodward M, et al. Twenty-year predictors of peripheral arterial disease compared with coronary heart disease in the Scottish Heart Health Extended Cohort (SHHEC). *J Am Heart Assoc*. 2017;6.
- US Preventive Services Task Force, Mangione CM, Barry MJ, Nicholson WK, Cabana M, Chelmow D, et al. Statin use for the primary prevention of cardiovascular disease in adults: US Preventive Services Task Force recommendation statement. *JAMA*. 2022;328(8):746-753.

- Verbeek R, Sandhu MS, Hovingh GK, Sjouke B, Wareham NJ, Zwinderman AH, et al. Lipoprotein(a) improves cardiovascular risk prediction based on established risk algorithms. *J Am Coll Cardiol.* 2017;69(11):1513-1515.
- Visseren FL, Mach F, Smulders YM, Carballo D, Koskinas KC, Bäck M et al. ESC Guidelines on cardiovascular disease prevention in clinical practice: Developed by the Task Force for cardiovascular disease prevention in clinical practice with representatives of the European Society of Cardiology and 12 medical societies With the special contribution of the European Association of Preventive Cardiology (EAPC). *Eur Heart J.* 2021;42(34):3227-337.
- Waldeyer C, Makarova N, Zeller T, et al. Lipoprotein(a) and the risk of cardiovascular disease in the European population: results from the Biomar-CaRE consortium. *Eur Heart J.* 2017;38:2490–2498.
- Welsh P, Welsh C, Celis-Morales CA, Brown R, Ho FK, Ferguson LD, et al. Lipoprotein(a) and cardiovascular disease: prediction, attributable risk fraction, and estimating benefits from novel interventions. *Eur J Prev Cardiol.* 2022;28(18):1991-2000.
- Wilsgaard T, Mathiesen EB, Patwardhan A, Rowe MW, Schirmer H, Løchen ML, et al. Clinically significant novel biomarkers for prediction of first ever myocardial infarction: the Tromsø study. *Circ Cardiovasc Genet.* 2015;8(2):363-71.

## METHODS

Major guidelines published in the last 5 years (2018 AHA, 2020 Veterans Affairs, 2021 CCS, 2022 USPSTF, 2019 ESC on dyslipidemia, 2021 ESC on CVD prevention) were reviewed to identify relevant recommendations and the evidence for those recommendations.

Several searches outlined below were conducted between November 17 and December 22, 2022.

- PubMed was searched using the search terms (Cardiovascular Risk Estimation OR Cardiovascular Risk Calculators OR Cardiovascular Risk Assessment) AND lipoprotein(a) [MeSH]. Results were limited to meta-analyses, systematic reviews, and to publication January 1, 2015, and later. This search returned 27 results with one systematic review meeting the inclusion criteria (**Forbes 2016**).
- Another keyword search was performed in PubMed using the search terms Lipoprotein a AND cardiovascular risk. This search was limited to systematic reviews and to publication January 1, 2015, and later. This search returned 41 results, including the previously noted systematic review by **Forbes 2016**. One additional relevant systematic review was identified through this search (**Kouvri 2019a**).
- A search of Google Scholar was performed using the search terms Lipoprotein a AND cardiovascular risk. Results were limited to publication January 1, 2015, and later. The first 5 pages of results were reviewed with no new relevant studies being identified.
- A search using the “similar articles” function in PubMed was performed against the relevant references that were used in the 2015 PEER Simplified Lipid Guideline. This search was limited to meta-analyses, systematic reviews, and to publication January 1, 2015, and later. In total, 103 studies were identified, many of which were duplicates of studies in the previous searches. No new relevant studies were identified in this search.

- The citation from the 2015 PEER Simplified Lipid Guideline was entered into Google Scholar and “see cited” was clicked. The results were reviewed with one additional relevant cohort study being identified (**Kouvari 2019b**). The reference list from the 2021 CCS guidelines was reviewed with one relevant case control study identified (**Pare 2019**).
- Given the lack of systematic reviews from the previous searches, a new keyword search was then performed in PubMed with no limits on study type for publications January 1, 2015, and later. The keywords lipoprotein a AND cardiovascular AND risk prediction were used. This search returned 240 results with 8 cohort studies and one nested case-control study identified for inclusion (**Agarwala 2016, Delabays 2021, Guertin 2020, Mehta 2020, Nomikos 2015, Patel 2021, Verbeek 2017, Welsh 2022, and Wilsgaard 2015**).

## APPENDIX

*Table 1A: Summary of characteristics and efficacy data of systematic reviews*

| Study                | Study type                                                                                                                              | Population                                                                               | Sample size      | Outcome                   | Cut-offs                                                    | Effect estimate (95% CI) | Notes                                                                                                                                                                                                                                                                             |
|----------------------|-----------------------------------------------------------------------------------------------------------------------------------------|------------------------------------------------------------------------------------------|------------------|---------------------------|-------------------------------------------------------------|--------------------------|-----------------------------------------------------------------------------------------------------------------------------------------------------------------------------------------------------------------------------------------------------------------------------------|
| <b>Forbes 2016</b>   | SR of 7 high-risk primary prevention studies (1 RCT, 6 prospective cohorts), of which 1 included in analysis met our inclusion criteria | <b>Pernod 2006</b><br>Mixed gender adults (22-92 years) with and without type 2 diabetes | 279              | CVD events and CV death   | Lp(a) >300 mg/L vs ≤300 mg/L                                | HR 1.67 (1.04 to 2.63)   | Meta-analysis was not possible due to heterogeneity in CVD outcomes, populations, and statistical analysis methods;<br>CVD events: MI, de novo angina pectoris or coronary revascularization, ischemic stroke, or PAD, CV death (due to cardiac arrhythmia, MI, or heart failure) |
| <b>Kouvari 2019a</b> | SR of 13 primary prevention studies, of which 4 included in analysis met our inclusion criteria                                         | Varied populations (not well described in SR)                                            | Overall: 211,087 |                           |                                                             |                          |                                                                                                                                                                                                                                                                                   |
|                      |                                                                                                                                         | <b>Foscolou 2018</b><br>Cohort of apparently healthy adults in Greece                    | 3,042            | Combined first CVD events | Lp(a) per 1 mg/dL                                           | HR 1.02 (1.01 to 1.04)   | Adjusted for age, sex, diabetes, hypertension, hypercholesterolemia, family history of CVD, BMI, physical activity, current smoking;<br>Median FU 8.41 years                                                                                                                      |
|                      |                                                                                                                                         | <b>Tunstall-Pedoe 2017</b><br>Cohort of apparently healthy adults in Scotland            | 15,737           | CHD                       | Lp(a) per 3.64 mg/dL increase                               | HR 1.01 (0.97 to 1.05)   | Adjusted for ASSIGN score factors (i.e. age, sex, socioeconomic status, family history of CVD, diabetes, smoking, blood pressure, total cholesterol, LDL-C, HDL-C);<br>Median FU 20 years                                                                                         |
|                      |                                                                                                                                         | <b>Cao 2017</b><br>Cohort of apparently healthy adults in USA                            | 4,629            | CHD                       | Lp(a) upper vs bottom 25 <sup>th</sup> percentile (≥39.9 vs | HR 1.49 (1.16 to 1.91)   | Adjusted for age, sex, race/ethnicity, hypertension, smoking, education status, diabetes, LDL-C, HDL-C;<br>Median FU 12 years                                                                                                                                                     |

| Study | Study type | Population                                                            | Sample size | Outcome | Cut-offs                                                             | Effect estimate (95% CI) | Notes                                                                                             |
|-------|------------|-----------------------------------------------------------------------|-------------|---------|----------------------------------------------------------------------|--------------------------|---------------------------------------------------------------------------------------------------|
|       |            |                                                                       |             |         | <39.9 mg/dL)                                                         |                          |                                                                                                   |
|       |            | <b>Waldeyer 2017</b><br>Cohort of apparently healthy adults in Europe | 56,804      | MACE    | Lp(a) ≥90 <sup>th</sup> vs 33 <sup>rd</sup> percentile (≥43.5 mg/dL) | HR 1.49 (1.29 to 1.73)   | Adjusted for age, sex, cohort, smoking status, total cholesterol, diabetes, hypertension, and BMI |

BMI = body mass index; CHD = coronary heart disease; CI = confidence interval; CV = cardiovascular; CVD = cardiovascular disease; FU = follow-up; HR = hazard ratio; HDL-C = high-density lipoprotein-cholesterol; LDL-C = low-density lipoprotein-cholesterol; Lp(a) = lipoprotein a; MACE = major adverse cardiovascular events; MI = myocardial infarction; PAD = peripheral artery disease; SR = systematic review

*Table 1B: Summary of characteristics and efficacy data of observational studies*

| Study         | Population                                                                                                                    | Sample size | Outcome                                                       | Cut-offs                                                         | Effect estimate (95% CI)                                                                        | Notes                                                                                                            |
|---------------|-------------------------------------------------------------------------------------------------------------------------------|-------------|---------------------------------------------------------------|------------------------------------------------------------------|-------------------------------------------------------------------------------------------------|------------------------------------------------------------------------------------------------------------------|
| Agarwala 2016 | Cohort study; participants from the ARIC study from US communities; ages 45 – 64 (avg age 63); primary prevention; 59% female | 8,127       | CHD = definite or probable MI or fatal CHD (# of events= 620) |                                                                  | HR 1.08 (1.01 to 1.15)                                                                          | HR for 1 unit increment of the log Lp(a)<br>Adjusted for age at visit 4, race, and gender                        |
|               |                                                                                                                               |             |                                                               |                                                                  | HR 1.09 (1.02 to 1.16)                                                                          | HR for 1 unit increment of the log Lp(a)<br>Adjusted for ARIC 10-year CHD risk score                             |
|               |                                                                                                                               |             | CVD = CHD + stroke (# of events= 924)                         |                                                                  | HR 1.05 (1.00 to 1.11)                                                                          | HR for 1 unit increment of the log Lp(a)<br>Adjusted for age at visit 4, race, and gender                        |
|               |                                                                                                                               |             |                                                               |                                                                  | HR 1.06 (1.00 to 1.12)                                                                          | HR for 1 unit increment of the log Lp(a)<br>Adjusted for variables used in CHD as well as the stroke risk scores |
| Delabays 2021 | Cohort study; Swiss adults aged 35-75 years; mean follow up of 9.9 years                                                      | 4,829       | Incident ASCVD                                                | Dichotomized Lp(a) <50 vs ≥50 mg/dL added to ESC/SCORE algorithm | ESC/SCORE<br>C-stat 0.780 (0.755 to 0.805)<br><br>Adding Lp(a)<br>C-stat 0.784 (0.759 to 0.809) |                                                                                                                  |

| Study                  | Population                                                                                              | Sample size                            | Outcome                                                        | Cut-offs                                                                         | Effect estimate (95% CI)               | Notes                                                                                                                                                                                                                                                                                                                                     |
|------------------------|---------------------------------------------------------------------------------------------------------|----------------------------------------|----------------------------------------------------------------|----------------------------------------------------------------------------------|----------------------------------------|-------------------------------------------------------------------------------------------------------------------------------------------------------------------------------------------------------------------------------------------------------------------------------------------------------------------------------------------|
|                        |                                                                                                         |                                        |                                                                |                                                                                  | Difference in C-statistic = 0.004      |                                                                                                                                                                                                                                                                                                                                           |
|                        |                                                                                                         |                                        |                                                                |                                                                                  | NRI 3.3% (0.80 to 5.80) (P-value=0.01) | Overall NRI                                                                                                                                                                                                                                                                                                                               |
|                        |                                                                                                         |                                        |                                                                |                                                                                  | NRI 11.4% (5.9 to 16.8)                | NRI for intermediate-risk individuals only                                                                                                                                                                                                                                                                                                |
| Guertin 2020           | Cohort study; Participants from the EPIC-Norfolk study; ages 40 – 79 years                              | 25,663                                 | CAD = myocardial ischemia, MI, or other ischemic heart disease | Lp(a) level ( $\leq 11.4$ [lowest quintile] vs $>69.7$ mg/dL [highest quintile]) | HR 1.61 (1.42 to 1.84)                 | Adjusted for age, sex, smoking BMI, systolic BP, diabetes, and eGFR                                                                                                                                                                                                                                                                       |
|                        |                                                                                                         |                                        |                                                                | Lp(a) level ( $<50$ vs $\geq 50$ mg/dL)                                          | HR 1.50 (1.38 to 1.64)                 |                                                                                                                                                                                                                                                                                                                                           |
| Kouvari 2019b “ATTICA” | Cohort study; Healthy volunteers residing in Greece; 1,514 men (mean age 46); 1,528 women (mean age 45) | 3,042 (initial cohort); 1,890 included | 10-year CVD event                                              | Lp(a) $\geq 50$ mg/dL versus $<50$ mg/dL                                         | HR 2.21 (1.16 to 4.21) (Model 4)       | CVD Event = acute MI, unstable angina, or other identified forms of ischemia; Threshold of 50 mg/dL = Lp(a) “normal”; Table 2 = Cox-regression models to evaluate the association of abnormal Lp(a) Levels (cut off point of 50 mg/dL) with 10-year CVD risk (N = 1,890); Model 4 adjusted for other lipid markers and the use of statins |
|                        |                                                                                                         |                                        |                                                                | Table 2                                                                          |                                        |                                                                                                                                                                                                                                                                                                                                           |
|                        |                                                                                                         |                                        |                                                                | Lp(a) $\geq 30$ mg/dL versus $<30$ mg/dL                                         | HR 1.18 (0.82 to 1.60) (Model 4)       |                                                                                                                                                                                                                                                                                                                                           |
|                        |                                                                                                         |                                        |                                                                | Standard model adjusted for Lp(a)                                                | Men<br>C-index 0.769 (0.709 to 0.828)  | Table 4: Discrimination-ability parameters of multivariate models adjusted for lipoprotein (a) over the 10-year first fatal/nonfatal CVD event;                                                                                                                                                                                           |
|                        |                                                                                                         |                                        |                                                                |                                                                                  | Women                                  |                                                                                                                                                                                                                                                                                                                                           |



| Study        | Population                                                                                                              | Sample size            | Outcome               | Cut-offs                                       | Effect estimate (95% CI)       | Notes                                                                                                                                                                                                                                                                                                                                           |
|--------------|-------------------------------------------------------------------------------------------------------------------------|------------------------|-----------------------|------------------------------------------------|--------------------------------|-------------------------------------------------------------------------------------------------------------------------------------------------------------------------------------------------------------------------------------------------------------------------------------------------------------------------------------------------|
|              |                                                                                                                         |                        |                       |                                                | C-index 0.820 (0.772 to 0.880) | Model 2- adjusted for age, BMI, current smoking, MedDietScore, hypertension, DMII, and family history of CVD                                                                                                                                                                                                                                    |
| Mehta 2020   | Cohort study; ARIC (Atherosclerosis Risk in Communities) and DHS (Dallas Heart Study) cohorts; participants without CVD | 12,149 (ARIC)          | ASCVD in ARIC cohort  | Race-specific quintile 5 (vs quintiles 1 to 4) | HR 1.25 (1.12 to 1.40)         | Adjusted for age, sex, race, diabetes, smoking, systolic blood pressure, antihypertensive use, total cholesterol, high-density lipoprotein cholesterol, triglycerides, body mass index, and statin use at baseline                                                                                                                              |
|              |                                                                                                                         | 2,756 (DHS)            | CHD in ARIC cohort    | Race-specific quintile 5 (vs quintiles 1 to 4) | HR 1.27 (1.12 to 1.45)         |                                                                                                                                                                                                                                                                                                                                                 |
|              |                                                                                                                         |                        | ASCVD in DHS cohort   | Race-specific quintile 5 (vs quintiles 1 to 4) | HR 1.64 (0.96 to 2.80)         |                                                                                                                                                                                                                                                                                                                                                 |
| Nomikos 2015 | Cohort study; ATTICA cohort of adults in Greece without any chronic disease                                             | 3,042 (2,583 included) | Incident CVD          | Lp(a) per 1 mg/dL                              | RR 1.003 (0.997 to 1.010)      | All models were adjusted for age, sex, BMI, smoking habits, physical activity status, MedDietScore, history and pharmaceutical management of dyslipidemias, hypertension, and diabetes, and family history of CVD at baseline examination                                                                                                       |
|              |                                                                                                                         | 2,020                  | 10-year CVD incidence |                                                | cNRI 6.7%                      | Lp(a) (per 1mg/dL) added to other predictors                                                                                                                                                                                                                                                                                                    |
| Pare 2019    | Case control study; INTERHEART study cohort                                                                             | 12,943                 | MI                    | Lp(a) <50 mg/dl vs ≥50 mg/dl                   | OR 1.48 (1.30 to 1.67)         | Tested for associations between Lp(a) using various cut-offs of 30, 40, 60, 70 mg/dL); OR ranged from 1.33 to 1.73 (all statistically significant)                                                                                                                                                                                              |
| Patel 2021   | Cohort study; UK Biobank participants; aged 40-69                                                                       | 460,506                | Incident ASCVD        | Lp(a) ≥150 nmol/L vs <150 nmol/L               | HR 1.50 (1.44 to 1.56)         | Adjusted for enrollment age, sex, and self-reported race; ASCVD = composite of coronary artery disease (MI and its acute complications, coronary artery bypass graft surgery, or percutaneous angioplasty/stent placement) and ischemic stroke (cerebral infarction due to thrombosis or cerebral atherosclerosis or cerebrovascular syndromes) |

| Study                   | Population                                                                                                                 | Sample size                   | Outcome    | Cut-offs                                                      | Effect estimate (95% CI)                     | Notes                                                                                                                                                                                                                                                                                                                             |
|-------------------------|----------------------------------------------------------------------------------------------------------------------------|-------------------------------|------------|---------------------------------------------------------------|----------------------------------------------|-----------------------------------------------------------------------------------------------------------------------------------------------------------------------------------------------------------------------------------------------------------------------------------------------------------------------------------|
| Verbeek 2017            | Cohort study; EPIC (European Prospective Investigation of Cancer)-Norfolk study participants                               | 16,777                        | CVD        | Lp(a) level (<30 vs ≥30 mg/dL) added to ACC/AHA               | NRI -2.76%                                   |                                                                                                                                                                                                                                                                                                                                   |
|                         |                                                                                                                            |                               |            | Lp(a) level (<30 vs ≥30 mg/dL) added to SCORE                 | NRI 0.57%                                    |                                                                                                                                                                                                                                                                                                                                   |
|                         |                                                                                                                            |                               |            |                                                               | NRI 15.88%                                   | NRI for intermediate risk according to ACC/AHA                                                                                                                                                                                                                                                                                    |
|                         |                                                                                                                            |                               |            |                                                               | NRI 16.83%                                   | NRI for intermediate risk according to SCORE                                                                                                                                                                                                                                                                                      |
|                         |                                                                                                                            |                               |            | Lp(a) level (<50 vs ≥50 mg/dL) added to ACC/AHA               | NRI -2.27%                                   |                                                                                                                                                                                                                                                                                                                                   |
|                         |                                                                                                                            |                               |            | Lp(a) level (<50 vs ≥50 mg/dL) added to SCORE                 | NRI 0.53%                                    |                                                                                                                                                                                                                                                                                                                                   |
| Welsh 2022              | Cohort study; UK Biobank participants, aged 37-73, sub-cohort of participants without baseline CVD and not taking a statin | 340,339                       | CVD        | Lp(a) per 1-SD increase (compared to reference of <20 nmol/L) | HR 1.13 (1.10 to 1.16)                       | Adjusted for age, sex, total cholesterol, HDL-C, ethnicity, smoking, SBP, BP medications, and baseline diabetes;                                                                                                                                                                                                                  |
|                         |                                                                                                                            |                               |            |                                                               | Change in c-index +0.0017 (0.0008 to 0.0026) | Change in C-index when added to classical risk factors;<br>Classical risk factors: age, sex, total cholesterol, HDL-C, ethnicity, smoking, SBP, BP medications, and baseline diabetes                                                                                                                                             |
|                         |                                                                                                                            |                               |            |                                                               | Overall NRI +0.0112% (+0.0039 to +0.0184)    |                                                                                                                                                                                                                                                                                                                                   |
| Wilsgaard 2015 "TROMSO" | Nested case-control study; Subset of participants in the fourth survey of the                                              | 817 (419 cases; 398 controls) | 10-year MI |                                                               |                                              | Cases = all participants with no previous MI, ischemic stroke, coronary artery bypass grafting, percutaneous coronary intervention or self-reported angina at baseline AND who experienced a first-ever MI within 10 years of follow up;<br>Controls = randomly selected from the entire group of participants completing 10-year |

| Study | Population                                                                                                                                                                                                                                                       | Sample size | Outcome    | Cut-offs | Effect estimate (95% CI)    | Notes                                                                                                                                                                                                           |
|-------|------------------------------------------------------------------------------------------------------------------------------------------------------------------------------------------------------------------------------------------------------------------|-------------|------------|----------|-----------------------------|-----------------------------------------------------------------------------------------------------------------------------------------------------------------------------------------------------------------|
|       | Tromsø study (1994-1995)<br>Eligible were men (aged 55-74) and women (aged 50-74) and 5-10% samples of other subjects aged 25-85.<br><br><u>Baseline Lp(a)</u><br>Women: Cases 160.2 ng/mL; Controls 135.2 ng/mL<br>Men: Cases 150.6 ng/mL; Controls 101.1 ng/mL |             |            |          |                             | follow-up without an event of interest and using the same inclusion criteria as the cases; Excluding subjects with DMII or who had non-fasting glucose level $\geq 200$ mg/dL or HbA1c $\geq 6.5\%$ at baseline |
|       |                                                                                                                                                                                                                                                                  |             | 10-year MI | Lp(a)    | OR 1.26 (1.09 to 1.47)      | OR (per 1 SD change of transformed concentrations calculated in control subjects);<br>Multivariate adjustment = age, sex, age*sex, BP, BP*BP meds, total cholesterol, HDL-C, and daily smoking                  |
|       |                                                                                                                                                                                                                                                                  |             | 10-year MI |          | NRI overall 0.085 (P=0.024) | NRI comparing traditional risk factors to Lp(a) +3 other biomarkers (ApoB/ApoA ratio, kallikrein, matrix metalloproteinase 9)                                                                                   |
|       |                                                                                                                                                                                                                                                                  |             | 10-year MI |          | ROC-AUC 0.027 (P=0.002)     | Lp(a) plus 3 other biomarkers compared to traditional risk factors                                                                                                                                              |

ACC/AHD = American College of Cardiology/American Heart Association; ApoA = apolipoprotein a; ApoB = apolipoprotein b; ASCVD = atherosclerotic cardiovascular disease; BMI = body mass index; BP = blood pressure; CAD = coronary artery disease; CHD = coronary heart disease; CI = confidence interval; cNRI = continuous net reclassification index; CV = cardiovascular; CVD = cardiovascular disease; DMII = type 2 diabetes mellitus; FU = follow-up; HR = hazard ratio; HDL-C = high-density lipoprotein-cholesterol; eGFR = estimated glomerular filtration rate; HbA1c = hemoglobin A1c; LDL-C = low-density lipoprotein-cholesterol; Lp(a) = lipoprotein a; MACE = major adverse cardiovascular events; MI = myocardial infarction; NRI = net reclassification index; OR = odds ratio; PAD = peripheral artery disease; ROC-AUC = area under the receiver operating characteristic curve; RR = risk ratio; SBP = systolic blood pressure; SD = standard deviation; SR = systematic review

***Table 2A: Quality assessment of systematic reviews of observational studies using AMSTAR-2D***

| Study         | AMSTAR-2 Rating | Rationale                                                                                                                                                                                 |
|---------------|-----------------|-------------------------------------------------------------------------------------------------------------------------------------------------------------------------------------------|
| Forbes 2016   | Critically low  | No list of excluded studies; did not consider risk of bias when interpreting results of review                                                                                            |
| Kouvari 2019a | Critically low  | No prespecified protocol; no comprehensive literature search; no list of excluded studies; did not assess risk of bias, did not consider risk of bias when interpreting results of review |

AMSTAR-2D = Assessment of Multiple Systematic Reviews

*Table 2B: Quality assessment of observational studies using QUAPAS*

| Study          | Participants                                          |                                                                    | Index Test                                                                  |                                                                                                               | Outcome                                                 |                                                                         | Flow and timing                            |                                                                              | Analysis                                 |
|----------------|-------------------------------------------------------|--------------------------------------------------------------------|-----------------------------------------------------------------------------|---------------------------------------------------------------------------------------------------------------|---------------------------------------------------------|-------------------------------------------------------------------------|--------------------------------------------|------------------------------------------------------------------------------|------------------------------------------|
|                | Could selection of participants have introduced bias? | Are there concerns that participants do not match review question? | Could the conduct or interpretation of the index test have introduced bias? | Are there concerns that the index test, its conduct, interpretation or threshold differ from review question? | Could measurements of the outcome have introduced bias? | Are there concerns that the outcome does not match the review question? | Could the study flow have introduced bias? | Are there concerns that the time horizon does not match the review question? | Could the analysis have introduced bias? |
| Agarwala 2016  | Low                                                   | Low                                                                | Low                                                                         | Low                                                                                                           | Low                                                     | Low                                                                     | Unclear                                    | Low                                                                          | Unclear                                  |
| Delabays 2021  | Unclear                                               | Low                                                                | Low                                                                         | Low                                                                                                           | Unclear                                                 | Low                                                                     | Unclear                                    | Low                                                                          | Unclear                                  |
| Guertin 2020   | Low                                                   | Low                                                                | Low                                                                         | Low                                                                                                           | Low                                                     | Low                                                                     | Unclear                                    | Low                                                                          | Unclear                                  |
| Kouvari 2019b  | Low                                                   | Low                                                                | Low                                                                         | Low                                                                                                           | Low                                                     | Low                                                                     | Unclear                                    | Low                                                                          | Unclear                                  |
| Mehta 2020     | Low                                                   | Low                                                                | Low                                                                         | Low                                                                                                           | Low                                                     | Low                                                                     | Unclear                                    | Low                                                                          | Unclear                                  |
| Nomikos 2015   | Low                                                   | Low                                                                | Low                                                                         | Low                                                                                                           | Low                                                     | Low                                                                     | Unclear                                    | Low                                                                          | Unclear                                  |
| Pare 2019      | High                                                  | High                                                               | Low                                                                         | Low                                                                                                           | Unclear                                                 | Low                                                                     | Unclear                                    | Unclear                                                                      | Unclear                                  |
| Patel 2021     | Low                                                   | Low                                                                | Low                                                                         | Low                                                                                                           | Low                                                     | Low                                                                     | Low                                        | Low                                                                          | Unclear                                  |
| Verbeek 2017   | Low                                                   | Low                                                                | Low                                                                         | Low                                                                                                           | Low                                                     | Low                                                                     | Unclear                                    | Low                                                                          | Unclear                                  |
| Welsh 2022     | Low                                                   | Low                                                                | Low                                                                         | Low                                                                                                           | Low                                                     | Low                                                                     | Low                                        | Low                                                                          | Unclear                                  |
| Wilsgaard 2015 | Low                                                   | Low                                                                | Low                                                                         | Low                                                                                                           | Low                                                     | Low                                                                     | Unclear                                    | Low                                                                          | Unclear                                  |

QUAPAS = Quality Assessment of Prognostic Accuracy Studies

*Table 3: GRADE certainty of evidence for addition of Lp(A) to risk calculators to predict the risk of incident CVD*

**Prognostic factor:** Lp(A) added to risk calculator

**Outcome: incident CVD**

| Study design    | No. studies (no. patients) | Risk of bias | Inconsistency | Indirectness | Imprecision | Publication bias | Large effect | Plausible confounding | Dose-response gradient | Effect estimate (range)          | Certainty                                  |
|-----------------|----------------------------|--------------|---------------|--------------|-------------|------------------|--------------|-----------------------|------------------------|----------------------------------|--------------------------------------------|
| Prognostic obs. | 2 (4,829-340,339)          | Not serious  | Not serious   | Not serious  | Not serious | Not detected     | No           | No                    | No                     | Change in c-stat 0.0017 to 0.004 | High<br><br>This outcome has no downgrades |

CVD = cardiovascular disease; Lp(A) = lipoprotein A; obs. = observational

*Table 4: Summary of recommendations from major guidelines published within the past 5 years*

| Our question                                                                                                                                                             | 2018 AHA <sup>1</sup>                                                                                                                                                                                                                                                         | 2019 ESC Dyslipidemia <sup>2</sup>                                                                                                                                                                                                                                                                                                                                | 2020 VA <sup>3</sup>                                                                                | 2021 CCS <sup>4</sup>                                                                                                                                                                                                                                                                                                | 2021 ESC CVD Prevention <sup>5</sup>                                                              | 2022 USPSTF <sup>6</sup> |
|--------------------------------------------------------------------------------------------------------------------------------------------------------------------------|-------------------------------------------------------------------------------------------------------------------------------------------------------------------------------------------------------------------------------------------------------------------------------|-------------------------------------------------------------------------------------------------------------------------------------------------------------------------------------------------------------------------------------------------------------------------------------------------------------------------------------------------------------------|-----------------------------------------------------------------------------------------------------|----------------------------------------------------------------------------------------------------------------------------------------------------------------------------------------------------------------------------------------------------------------------------------------------------------------------|---------------------------------------------------------------------------------------------------|--------------------------|
| In patients without established CVD, does the use of lipoprotein A meaningfully change CVD risk estimation more than standard risk estimates (e.g., age, smoking) alone? | In adults 40 to 75 years of age without DM and 10-year risk of 7.5% to 19.9% (intermediate risk), risk-enhancing factors favor initiation of statin therapy. Risk-enhancing factors include...Lp(a)≥50 mg/dL (125 nmol/L). Risk-enhancing factors may favor statin therapy in | Lp(a) measurement should be considered at least once in each adult person’s lifetime to identify those with very high inherited Lp(a) levels >180 mg/dL (>430 nmol/L) who may have a lifetime risk of ASCVD equivalent to the risk associated with heterozygous familial hypercholesterinemia (class IIa, level C).<br><br>Lp(a) should be considered in selected | We suggest against the routine use of additional risk markers when assessing CV risk (weak against) | We recommend measuring Lp(a) level once in a person’s lifetime as part of the initial lipid screening (strong recommendation; high-quality evidence).<br><br>For all persons in the setting of primary prevention with a Lp(a) ≥50 mg/dL (or ≥ 100 nmol/L), we recommend earlier and more intensive health behaviour | No recommendation: Lp(a) provides limited additional value in terms of reclassification potential | No recommendation        |

| Our question | 2018 AHA <sup>1</sup>                                | 2019 ESC Dyslipidemia <sup>2</sup>                                                                                                                         | 2020 VA <sup>3</sup> | 2021 CCS <sup>4</sup>                                                                                         | 2021 ESC CVD Prevention <sup>5</sup> | 2022 USPSTF <sup>6</sup> |
|--------------|------------------------------------------------------|------------------------------------------------------------------------------------------------------------------------------------------------------------|----------------------|---------------------------------------------------------------------------------------------------------------|--------------------------------------|--------------------------|
|              | patients at 10-year risk of 5-7.5% (borderline risk) | patients with a family history of premature CVD, and for reclassification in people who are borderline between moderate and high-risk (class IIa, level C) |                      | modification counselling and management of other ASCVD risk factors (strong recommendation; expert consensus) |                                      |                          |

<sup>1</sup>Grundy 2018; <sup>2</sup>Mach 2020; <sup>3</sup>Management of Dyslipidemia for Cardiovascular Risk Reduction Work Group 2020; <sup>4</sup>Pearson 2021; <sup>5</sup>Visseren 2021; <sup>6</sup>US Preventive Services Task Force 2022

ASCVD = atherosclerotic cardiovascular disease; CV = cardiovascular; CVD = cardiovascular disease; DM = diabetes mellitus; Lp(A) = lipoprotein A

## **CHAPTER 3: APOLIPOPROTEIN B AND CARDIOVASCULAR RISK PREDICTION**

### **CLINICAL QUESTION**

In patients without established cardiovascular disease, does the addition of apolipoprotein B meaningfully change cardiovascular disease risk estimation compared to standard risk estimates (e.g., age, smoking) alone?

### **BOTTOM LINE**

Adding apolipoprotein B (apoB) to current cardiovascular (CV) risk calculators does not meaningfully add to cardiovascular disease (CVD) risk prediction.

### **EVIDENCE**

Since the 2015 PEER guideline (**Allan 2015**), two new systematic reviews (SRs) (**Perera 2015**, **Sandhu 2016**) and 7 observational studies (**Graversen 2016**, **Pencina 2015**, **Sniderman 2016**, **Vasquez-Oliva 2018**, **Welsh 2019**, **Wilsgaard 2015**) were published. A summary of study characteristics and efficacy data is reported in *Table 1* Quality assessment of included studies can be found in *Tables 2A-B*. GRADE certainty of evidence evaluation can be found in *Table 3*. All evidence statistically significant unless noted.

We found apoB risk ratios (RRs)/hazard ratios (HRs)/odds ratios (ORs) to predict CVD ranged from 1.03 to 2.87. In comparison, the RR for non-traditional risk markers like leucocyte count and albumin were 1.45 and 1.55, respectively. These numbers are not dissimilar to the number for apoB.

#### Systematic reviews

- **Perera 2015**: SR and meta-analysis of 10 primary prevention studies (N = 200,086)
  - CV events (adjusted): HR 1.28 (95% confidence interval [CI] 1.16 to 1.42)
- **Sandhu 2016**: SR and meta-analysis of 4 studies (N = 15,854)
  - CV events (including myocardial infarction [MI], ischemic heart disease, CV death): RR 1.31 (95% CI 1.22 to 1.40)
  - Limitations include variable cut-offs, outcomes, and outcome measures reported amongst studies; two studies appear to have been reporting on the same cohort at different time-points, possibly without censoring older results, leading to double-counting of some events

#### Observational studies

7 observational studies (N = 756-346,686)

- The largest and most relevant cohort to our question was **Welsh 2019** (N = 346,686; median 8.9 years) as it included the population we were looking for (adults without CVD who were not taking statins) and included results presented in a manner in which was more optimal when answering questions about the additive effect of biomarkers (e.g., C-statistics, net reclassification index)

- **Incident CVD:** when added to classical risk factors including total cholesterol and high-density-lipoprotein-cholesterol (HDL-c), apoB resulted in a change in C-index of 0.0004 (95% CI 0 to 0.0008) which is not clinically meaningful (**Welsh 2019**)
  - Net reclassification index +0.14% (95% CI -0.17 to +0.50%), not statistically different
- **CV death:** no difference in area under receiver-operating characteristic curve (ROC-AUC) when apoB added to SCORE risk calculator (including sex, age, smoking status, systolic blood pressure, total cholesterol) (**Graversen 2016**)
- **Coronary heart disease:** C-stat difference (based on non-HDL-c) 0.006 (95% CI 0.0003 to 0.013) between tertiles compared to the middle
  - Not clinically meaningful (**Pencina 2015**)
- **MI**
  - OR 1.36 (95% CI 1.32 to 1.41) for each standard-deviation increase in apoB (**Sniderman 2016**);
  - OR 1.21 (95% CI 1.01 to 1.44) for cases (1<sup>st</sup> MI) versus controls (no MI) over 10 years of follow-up (**Wilsgaard 2015**)
- **Coronary events:** HR not different when apoB added to age, sex, smoking status, diabetes status, blood pressure, total cholesterol, HDL (**Vasquez-Oliva 2018**)

### Limitations

Limitations in evidence are profound and similar to those found in the 2015 PEER Guideline (**Allan 2015**).

- Studies are heterogeneous in that:
  - Authors used multiple techniques to classify apoB risk groups including tertiles, quintiles, deciles, and by standard deviation
  - Analysis of the apoB risk groups varied considerably including comparing highest quintiles to middle which will give smaller association effects or highest versus lowest (example 1<sup>st</sup> decile to 10<sup>th</sup> deciles) which can give larger association effects
  - Methods of reporting the association effect size included ORs, HRs, ROC-AUC, net classification index
  - Statin use was inconsistent across studies
- It is possible the apparent effect is larger than the real effect as publication bias appears to be common among CV biomarker studies (**Nissen 2013**)
- Variable approaches to analysis in individual studies may also limit comparisons or application
  - One example is **Walldius 2021** who compares apoB to low-density-lipoprotein (LDL) for ROC-AUC; however, most CV risk calculators do not include LDL and instead include HDL



- Exclusion of those with hypertriglyceridemia in one study (**Pencina 2015**) despite the 2021 CCS guideline recommending apoB testing in hypertriglyceridemic patients (**Pearson 2021**)

## CONTEXT

### Discrimination

Discrimination is defined as the ability to identify individuals who will have an event, and can be assessed with area under the curve (which is equivalent to the c-statistic). A c-statistic value of 1.00 is perfect, 0.8 is good, 0.6-0.7 is acceptable, and 0.5 is similar to chance (**Allan 2014**). A change in the c-statistic of  $\geq 0.1$  is large, 0.05-0.1 is moderate, 0.025-0.05 is small, and  $< 0.025$  is very small (**Lin 2018**).

### Major guideline recommendations

Several recent guidelines have made recommendations regarding the use of apoB in primary prevention of CVD which have ranged from similar recommendations to the PEER group (**Management of Dyslipidemia for Cardiovascular Risk Reduction Work Group 2020**), no recommendation (**Visseren 2021; US Preventive Services Task Force 2022**), initiating statins in certain adults with “risk-enhancing factors” such as apoB levels  $\geq 1.3\text{g/L}$  if 10-year CVD risk was 7.5-19.9% (intermediate risk) (**Grundy 2018**), and using apoB in place of LDL-cholesterol as preferred lipid parameter for screening and treatment targets for patients with elevated triglycerides greater than 1.5mmol/L (**Pearson 2021**). A summary of guideline recommendations can be found in *Table 4*.

## REFERENCES

- Allan GM, Garrison S, McCormack J. Comparison of cardiovascular disease risk calculators. *Curr Opin Lipidol.* 2014; 25(4): 254-65.
- Allan GM, Lindblad AJ, Comeau A, Coppola J, Hudson B, Mannarino M, et al. Simplified lipid guidelines: prevention and management of cardiovascular disease in primary care. *Can Fam Phys.* 2015;61:857-867.
- Graversen P, Abildstrom SZ, Jespersen L, Borglykke, Prescott E. Cardiovascular risk prediction: can Systematic Coronary Risk Evaluation (SCORE) be improved by adding simple risk markers? Results from the Copenhagen City Heart Study. *Eur J Prev Cardiol.* 2016;23(14):1546-1556.
- Grundy SM, Stone NJ, Bailey AL, Beam C, Birtcher KK, Blumenthal RS, et al. 2018 AHA/ACC/AACVPR/AAPA/ABC/ACPM/ADA/AGS/APhA/NLA/PCNA guideline on the management of blood cholesterol: a report of the American College of Cardiology/American Heart Association task force on clinical practice guidelines. *Circulation.* 2018;139:e1082-e1143.
- Lin JS, Evans CV, Johnson E, Redmond N, Coppola EL, Smith N. Nontraditional Risk Factors in cardiovascular disease risk assessment: updated evidence report and systematic review for the US Preventive Services Task Force. *JAMA.* 2018;320:281297.

- Mach F, Baigent C, Catapano AL, Koskinas KC, Casula M, Badimon L et al. 2019 ESC/EAS Guidelines for the management of dyslipidaemias: lipid modification to reduce cardiovascular risk. *Eur Heart J*. 2020;41(1):111-188. doi: 10.1093/eurheartj/ehz455.
- The Management of Dyslipidemia for Cardiovascular Risk Reduction Work Group. VA/DoD clinical practice guideline for the management of dyslipidemia for cardiovascular risk reduction. US Department of Veterans Affairs, Department of Defense. 2020. 127 p.
- Nissen SE. Biomarkers in cardiovascular medicine: the shame of publication bias. *JAMA Intern Med*. 2013;173(8):671-672. doi: 10.1001/jamainternmed.2013.4074.
- Pearson GJ, Thanassoulis G, Anderson TJ, Barry AR, Couture P, Dayan N, et al. 2021 Canadian Cardiovascular Society guidelines for the management of dyslipidemia for the prevention of cardiovascular disease in adults. *Can J Cardiol*. 2021;37:1129-1150.
- Pencina MJ, D'Agostino RB, Zdrojewski T, Williams K, Thanassoulis G, Furberg CD, et al. Apolipoprotein B improves risk assessment of future coronary heart disease in the Framingham Heart Study beyond LDL-C and non-HDL-C. *Eur J Prev Cardiol*. 2015;22(10):1321-1327.
- Perera R, McFadden E, McLellan J, Lung T, Clarke P, Perez T, et al. Optimal strategies for monitoring lipid levels in patients at risk or with cardiovascular disease: a systematic review with statistical and cost-effectiveness modeling. *Health Technol Assess*. 2015;19(100).
- Sandhu PK, MUSAAD SM, Remaley AT, Buehler SS, Strider S, Derzon JH, et al. Lipoprotein biomarkers and risk of cardiovascular disease: a Laboratory Medicine Best Practices (LMBP) systematic review. *J Appl Lab Med*. 2016;1(2):214-229.
- Sniderman AD, Islam S, McQueen M, Pencina M, Furberg CD, Thanassoulis G, et al. Age and cardiovascular risk attributable to apolipoprotein B, low-density lipoprotein cholesterol or non-high-density lipoprotein cholesterol. *J Am Heart Assoc*. 2016;5:e003665.
- US Preventative Services Task Force. Statin use for the primary prevention of cardiovascular disease in adults. *JAMA*. 2022;328(8):746-753.
- Vasquez-Oliva G, Zamora A, Ramos R, Subirana I, Grau M, Degana IR, et al. Analysis of plasma albumin, vitamin D, and apolipoproteins A and B as predictive coronary risk biomarkers in the REGICOR study. *Rev Exp Cardiol*. 2018;71(11):910-916.
- Visseren FL, Mach F, Smulders YM, Carballo D, Koskinas KC, Bäck M et al. ESC Guidelines on cardiovascular disease prevention in clinical practice: Developed by the Task Force for cardiovascular disease prevention in clinical practice with representatives of the European Society of Cardiology and 12 medical societies With the special contribution of the European Association of Preventive Cardiology (EAPC). *Eur Heart J*. 2021;42(34):3227-337.
- Walldius G, de Faire U, Alfredsson L, Leander K, Westerholm P, Malmstrom H, et al. Long-term risk of a major cardiovascular event by apoB, apoA-1, and the apoB/apoA-1 ratio – experience from the Swedish AMORIS cohort: a cohort study. *PLOS Med*. 2021;18(12):e1003853.

- Welsh C, Celis-Morales CA, Brown R, Mackay DF, Lewsey J, Mark PB, et al. Comparison of conventional lipoprotein tests and apolipoproteins in the prediction of cardiovascular disease: data from UK Biobank. *Circulation*. 2019;140:542-552.
- Wilsgaard T, Mathiesen EB, Patwardhan A, Rowe MW, Schirmer H, Lochen ML, et al. Clinically significant novel biomarkers for prediction of first ever myocardial infarction: the Tromso study. *Circ Cardiovasc Genet*. 2015;8:363-371.

## METHODS

- Major guidelines published in the last 5 years (2018 AHA, 2020 Veterans Affairs, 2021 CCS, 2022 USPSTF, 2019 ESC on dyslipidemia, 2021 ESC on CVD prevention) were reviewed to identify relevant recommendations and the evidence for those recommendations. Several searches outlined below were conducted between November 17 and December 13, 2022.
- PubMed (1): searched using terms [(Cardiovascular Risk Estimation OR Cardiovascular Risk Calculators OR Cardiovascular Risk Assessment) AND apolipoprotein(b)] OR [{"apolipoprotein B" AND "cardiovascular risk"}]. Results were limited to systematic reviews or meta-analysis, and to publication January 1, 2015 and later. This search identified two systematic reviews (**Perera 2015, Sandhu 2016**).
  - Similar articles search: no additional relevant articles identified
- Google Scholar: search was conducted using the search terms "Apolipoprotein B and cardiovascular risk" and filtered from 2015 to present. In addition, any potentially relevant article was copied into the search bar and then clicked on "cited by" and searched for "systematic reviews" within those cited articles. This search resulted in 2 observational studies (**Pencina 2015, Sniderman 2016**) that were included for this evidence review.
  - Subsequently, another Google Scholar search was conducted using the search terms "'apolipoprotein b versus Framingham" which did not yield any additional studies.
- PubMed (2): Given the lack of systematic reviews from the previous searches, a new keyword search was then performed in PubMed with no limits on study type for publications January 1, 2015, and later. The keywords "apolipoprotein B" AND "cardiovascular" AND "risk prediction" were used and resulted in 3 further studies (**Graversen 2016, Vazquez-Oliva 2018, Wilsgaard 2015**).
  - Similar articles search: the most relevant systematic review citation from the 2015 PEER Simplified Lipid Guideline was entered into PubMed and "similar articles" search was completed which resulted in no new studies identified.
- Additional searches: two subsequent observational studies were identified as part of the apolipoprotein A search (**Walldius 2021, Welsh 2019**).

## APPENDIX

*Table 1: Summary of characteristics of systematic reviews and observational studies*

| Study          | Study type                            | Population                                                                                                                                                                    | Sample size | Cut-offs                        | Outcome                                                | Effect estimate* (95% CI)                             | Notes                                                                                                                                                             |
|----------------|---------------------------------------|-------------------------------------------------------------------------------------------------------------------------------------------------------------------------------|-------------|---------------------------------|--------------------------------------------------------|-------------------------------------------------------|-------------------------------------------------------------------------------------------------------------------------------------------------------------------|
| Perera 2015    | SR (10 studies in primary prevention) | Cohorts that had at least 12 months of follow up and a minimum of 1000 participants.<br>This analysis looked at ApoB for primary prevention in populations not taking statins | 200,086     |                                 | CV events<br><br>(Figure 85)                           | HR 1.28 (1.16 to 1.42)                                | HR for every 1-SD increase in ApoB                                                                                                                                |
| Sandhu 2016    | SR (4 studies included)               | Men 35+, women 45+, younger adults with CV risk factors, no previous CVD/DM, in- or out-patient settings                                                                      | 15,854      | Varied among 4 included studies | CV events (e.g., MI, ischemic heart disease, CV death) | RR 1.31 (1.22 to 1.40)                                | 2 studies may be same cohort at different time points; may not have been appropriate to meta-analyze outcomes due to heterogeneity (quartiles/tertiles/SD, HR/RR) |
| Graversen 2016 | Cohort                                | Copenhagen City Heart Study population part 3 (1991-1994), age 21-79; excluded those with prior CVD/DM                                                                        | 8,476       |                                 | CV death                                               | SCORE AUC 0.837 (0.820 to 0.855); no change with apoB | SCORE risk calculator includes sex, age, smoking, systolic BP, TC                                                                                                 |
|                |                                       |                                                                                                                                                                               |             |                                 |                                                        | NRI (NSS)                                             | ApoB adjusted for SCORE risk factors                                                                                                                              |
| Pencina 2015   | Cohort                                | Framingham offspring participants who attended 4th examination cycle<br>Excluded: previous CVD and high triglycerides                                                         | 2,966       | Tertiles (compared to middle)   | New onset coronary heart disease                       | C-stat difference 0.006 (0.0003 to 0.013)             | Adjusted for standard risk factors including age, sex, systolic BP, antihypertensive treatment, smoking, diabetes, HDL-C and non-HDL-C                            |

| Study              | Study type   | Population                                                                                                                                                              | Sample size | Cut-offs                       | Outcome                                                                 | Effect estimate* (95% CI)                                                                         | Notes                                                                                                                                |
|--------------------|--------------|-------------------------------------------------------------------------------------------------------------------------------------------------------------------------|-------------|--------------------------------|-------------------------------------------------------------------------|---------------------------------------------------------------------------------------------------|--------------------------------------------------------------------------------------------------------------------------------------|
| Sniderman 2016     | Cohort       | INTERHEART study cohort                                                                                                                                                 | 20,758      |                                | OR of MI for 1-SD change in ApoB overall (all ages)                     | OR 1.36 (1.32 to 1.41)                                                                            |                                                                                                                                      |
| Vasquez-Oliva 2018 | Case-cohort  | REGICOR study cohort; age 35-74, no prior CVD                                                                                                                           | 756         |                                | Coronary event                                                          | HR 1.03 (0.80 to 1.34)                                                                            | Model 2 adjusted for age, sex, smoking, DM, BP, TC, HDL-C                                                                            |
| Walldius 2021      | Cohort       | AMORIS cohort, consisting of individuals undergoing health examinations during 1985–1996 (baseline period); men and women (25-84 years) followed for average 17.8 years | 137,100     | Deciles (10th vs 1st)          | MACE (for ApoB/ApoA-1 ratios)                                           | HR 1.70                                                                                           |                                                                                                                                      |
|                    |              |                                                                                                                                                                         |             |                                | ApoB vs LDL (men and women combined)                                    | ROC-AUC 0.02 (P=0.0066)                                                                           | ApoB vs LDL (men and women combined)                                                                                                 |
| Welsh 2019         | Cohort       | UK Biobank participants, aged 37-73, without CVD and not taking statins followed for median 8.9 years                                                                   | 346,686     | Quintiles (compared to middle) | 1 SD increase in ApoB and Incident CVD                                  | HR 1.23 (1.20 to 1.26)                                                                            |                                                                                                                                      |
|                    |              |                                                                                                                                                                         |             |                                | C-index on addition of ApoB to classical risk factors plus TC and HDL-C | Change in C-index 0.004 (0.0000 to 0.0008)<br><br>Note: from C-index of 0.7463 (0.7406 to 0.7520) | “Adding any measure of LDL-C or ApoB alone to a model already containing TC and HDL-C offered no substantial discriminative benefit” |
|                    |              |                                                                                                                                                                         |             |                                | NRI compared to classical risk factors plus TC and HDL-C                | +0.14% (-0.17 to +0.50%)                                                                          |                                                                                                                                      |
| Wilsgaard 2015     | Case control | 4 <sup>th</sup> survey in Tromso Study (Norway), 25-85 years with no previous CVD and experienced first MI within 10 years of follow up (cases); matched with           | 817         |                                | Incident MI                                                             | OR 1.21 (1.01 to 1.44)                                                                            |                                                                                                                                      |
|                    |              |                                                                                                                                                                         |             |                                | Incident MI ApoB/ApoA-1 ratio <u>plus</u> 3 other biomarkers compared   | ROC-AUC 0.027 (P=0.002)                                                                           |                                                                                                                                      |

| Study | Study type | Population                                                                       | Sample size | Cut-offs | Outcome                                                                         | Effect estimate* (95% CI)   | Notes |
|-------|------------|----------------------------------------------------------------------------------|-------------|----------|---------------------------------------------------------------------------------|-----------------------------|-------|
|       |            | controls completing 10 year follow without event of interest; diabetics excluded |             |          | to traditional risk factors                                                     |                             |       |
|       |            |                                                                                  |             |          | NRI comparing traditional risk factors to ApoB/ApoA-1 ratio +3 other biomarkers | Overall NRI 0.085 (P=0.024) |       |

\*Used most-adjusted numbers

ApoA = apolipoprotein A; ApoB = apolipoprotein B; BP = blood pressure; CI = confidence interval; CV = cardiovascular; CVD = cardiovascular disease; HDL-C = high-density lipoprotein-cholesterol; DM = diabetes mellitus; HR = hazard ratio; LDL-C = low-density lipoprotein-cholesterol; MACE = major adverse cardiovascular events; MI = myocardial infarction; NR = not reported; NRI = net reclassification index; NSS = not statistically significant; OR = odds ratio; ROC-AUC = area under the receiver operating characteristic curve; SD = standard deviation; SR = systematic review; RR = risk ratio; TC = total cholesterol

*Table 2A: Quality assessment of systematic reviews of observational studies using AMSTAR-2D*

| Study       | Overall confidence | AMSTAR -2: list of weaknesses                                                               |
|-------------|--------------------|---------------------------------------------------------------------------------------------|
| Perera 2015 | Critically low     | ROB, ROB interpretation, publication bias                                                   |
| Sandhu 2016 | Critically low     | A priori, literature search, excluded studies, ROB, meta-analysis methods, publication bias |

AMSTAR-2D = Assessment of Multiple Systematic Reviews; ROB = risk of bias

**Table 2B: Quality assessment of observational studies using QUAPAS**

| Study                | Participants                                          |                                                                    | Index Test                                                                  |                                                                                                               | Outcome                                                 |                                                                         | Flow and timing                            |                                                                              | Analysis                                 |
|----------------------|-------------------------------------------------------|--------------------------------------------------------------------|-----------------------------------------------------------------------------|---------------------------------------------------------------------------------------------------------------|---------------------------------------------------------|-------------------------------------------------------------------------|--------------------------------------------|------------------------------------------------------------------------------|------------------------------------------|
|                      | Could selection of participants have introduced bias? | Are there concerns that participants do not match review question? | Could the conduct or interpretation of the index test have introduced bias? | Are there concerns that the index test, its conduct, interpretation or threshold differ from review question? | Could measurements of the outcome have introduced bias? | Are there concerns that the outcome does not match the review question? | Could the study flow have introduced bias? | Are there concerns that the time horizon does not match the review question? | Could the analysis have introduced bias? |
| Graversen 2016       | Low                                                   | Low                                                                | Unclear                                                                     | Unclear                                                                                                       | Low                                                     | Low                                                                     | Low                                        | Low                                                                          | Unclear                                  |
| Pencina 2015         | High                                                  | High                                                               | Unclear                                                                     | High                                                                                                          | Unclear                                                 | Low                                                                     | Low                                        | Low                                                                          | Unclear                                  |
| Sniderman 2016       | High                                                  | High                                                               | Unclear                                                                     | Low                                                                                                           | Unclear                                                 | Low                                                                     | Low                                        | Low                                                                          | Unclear                                  |
| Vazquez-Olivia 2018* | Low                                                   | Low                                                                | Low                                                                         | Low                                                                                                           | Low                                                     | Low                                                                     | Unclear                                    | High                                                                         | Unclear                                  |
| Walldius 2021*       | Low                                                   | Low                                                                | Low                                                                         | Low                                                                                                           | Unclear                                                 | Low                                                                     | Unclear                                    | Low                                                                          | Unclear                                  |
| Welsh 2019           | Low                                                   | Low                                                                | Low                                                                         | Low                                                                                                           | Unclear                                                 | Low                                                                     | Unclear                                    | Low                                                                          | Unclear                                  |
| Wilsgaard 2015       | Low                                                   | Low                                                                | Low                                                                         | Low                                                                                                           | Low                                                     | Low                                                                     | Unclear                                    | Low                                                                          | Unclear                                  |

QUAPAS = Quality Assessment of Prognostic Accuracy Studies

**Table 3: GRADE certainty of evidence for addition of apo(B) to risk calculators to predict the risk of incident CVD**

**Prognostic factor:** apo(B) added to risk calculator

**Outcome:** incident CVD

| Study design    | No. studies (no. patients) | Risk of bias | Inconsistency | Indirectness | Imprecision | Publication bias | Large effect | Plausible confounding | Dose-response gradient | Effect estimate (range)         | Certainty                                  |
|-----------------|----------------------------|--------------|---------------|--------------|-------------|------------------|--------------|-----------------------|------------------------|---------------------------------|--------------------------------------------|
| Prognostic obs. | 2 (2,966-346,686)          | Not serious  | Not serious   | Not serious  | Not serious | Not detected     | No           | No                    | No                     | Change in c-stat 0.004 to 0.006 | High<br><br>This outcome has no downgrades |

apo(B) = apolipoprotein B; CVD = cardiovascular disease; obs. = observational

**Table 4: Summary of recommendations from major guidelines published within the past 5 years**

| Our question                                                                                                                                                                | 2018 AHA <sup>1</sup>                                                                                                                                                                                                                                                                                         | 2019 ESC Dyslipidemia <sup>2</sup>                                                                                                                                                                                                                                                                                                        | 2020 VA <sup>3</sup>                                                                                | 2021 CCS <sup>4</sup>                                                                                                                                                                                                                                                             | 2021 ESC CVD Prevention <sup>5</sup> | 2022 USPSTF <sup>6</sup>                                                                                                                                                                                                                                                                                                                            |
|-----------------------------------------------------------------------------------------------------------------------------------------------------------------------------|---------------------------------------------------------------------------------------------------------------------------------------------------------------------------------------------------------------------------------------------------------------------------------------------------------------|-------------------------------------------------------------------------------------------------------------------------------------------------------------------------------------------------------------------------------------------------------------------------------------------------------------------------------------------|-----------------------------------------------------------------------------------------------------|-----------------------------------------------------------------------------------------------------------------------------------------------------------------------------------------------------------------------------------------------------------------------------------|--------------------------------------|-----------------------------------------------------------------------------------------------------------------------------------------------------------------------------------------------------------------------------------------------------------------------------------------------------------------------------------------------------|
| In patients without established CVD, does the use of apolipoprotein B meaningfully change CVD risk estimation more than standard risk estimates (e.g., age, smoking) alone? | In adults 40 to 75 years of age without DM and 10-year risk of 7.5% to 19.9% (intermediate risk), risk-enhancing factors favor initiation of statin therapy. Risk-enhancing factors include... apolipoprotein B ≥130 mg/dL. Risk-enhancing factors may favor statin therapy in patients at 10-year risk of 5- | ApoB analysis is recommended for risk assessment, particularly in people with high TG levels, DM, obesity, metabolic syndrome, or very low LDL-C levels. It can be used as an alternative to LDL-C, if available, as the primary measurement for screening, diagnosis, and management, and may be preferred over non-HDL-C in people with | We suggest against the routine use of additional risk markers when assessing CV risk (weak against) | For any patient with triglycerides > 1.5mmol/L, use non-HDL-C or apoB instead of LDL-C as the preferred lipid parameter for initial screening and treatment target (< 2.6 mM for non-HDL-C or <0.8 g/L for apoB) in intermediate or high-risk individuals (Strong recommendation, | NR                                   | No recommendation<br><br>In supplementary document it states: "Apolipoprotein B directly measures the total number of atherogenic particles, though it is unclear whether it is superior to non-HDL-C as a marker of CHD risk and is more difficult and costly to measure. The USPSTF previously (last updated in 2008) recommended lipid screening |



| <b>Our question</b> | <b>2018 AHA<sup>1</sup></b> | <b>2019 ESC Dyslipidemia<sup>2</sup></b>               | <b>2020 VA<sup>3</sup></b> | <b>2021 CCS<sup>4</sup></b> | <b>2021 ESC CVD Prevention<sup>5</sup></b> | <b>2022 USPSTF<sup>6</sup></b>                                                   |
|---------------------|-----------------------------|--------------------------------------------------------|----------------------------|-----------------------------|--------------------------------------------|----------------------------------------------------------------------------------|
|                     | 7.5% (borderline risk)      | high TG levels, DM, obesity, or very low LDL-C levels. |                            | High-Quality Evidence).     |                                            | with a fasting or nonfasting HDL-C, with either the total cholesterol or LDL-C.” |

<sup>1</sup>Grundy 2018; <sup>2</sup>Mach 2020; <sup>3</sup>Management of Dyslipidemia for Cardiovascular Risk Reduction Work Group 2020; <sup>4</sup>Pearson 2021; <sup>5</sup>Visseren 2021; <sup>6</sup>US Preventive Services Task Force 2022

ApoB = apolipoprotein B; CHD = coronary heart disease; CV = cardiovascular; CVD = cardiovascular disease; DM = diabetes mellitus; HDL-C = high-density lipoprotein-cholesterol; LDL-C = low-density lipoprotein-cholesterol; NR = not reported; TG = triglyceride

## **CHAPTER 4: EXERCISE AND CARDIOVASCULAR DISEASE**

### **CLINICAL QUESTION**

In patients with/at risk of cardiovascular disease, does increasing physical activity (including cardiac rehabilitation) reduce the risk of cardiovascular events?

### **BOTTOM LINE**

For patients without established cardiovascular disease (CVD), the majority of randomized controlled trial (RCT) evidence appears to show no benefit, particularly in all-cause mortality. This is based on underpowered studies that were often not designed to look at cardiovascular (CV) events or mortality.

For patients with established CVD, exercise-based cardiac rehabilitation decreases all-cause mortality by 10% and decreases myocardial infarction (MI) and CV mortality by 20-40% compared to no exercise control or usual care at >36 months. The outcome of major adverse cardiovascular events (MACE) is not consistently reported. This estimate is limited by the varied types of exercise studied, older studies, along with inconsistent intensity and duration. No evidence establishes optimal exercise duration or intensity.

### **EVIDENCE**

We found one systematic review (SR) of Cochrane SRs, one SR of RCTs, and two RCTs looking at exercise interventions. We limited our search to SRs of RCTs between 2017 and 2022. We found 3 SRs looking specifically at exercise-based cardiac rehabilitation. *Table 1* and *Table 2* summarize characteristics and results of the SRs. *Tables 3A-B* include the quality assessment of included reviews and RCTs. GRADE certainty of evidence evaluation can be found in *Table 4*.

#### **Primary prevention & mixed prevention**

- **Garcia-Hermoso 2020: SR**
  - 90 RCTs; N = 28,523; mean age 74.2 years; duration 52-208 weeks; 39 RCTs in an “apparently healthy population”
  - Exercise intervention ≥ 1 year in patients > 65 years old versus usual care that did not include exercise. Exercise interventions were primarily multi-component exercise training, muscle strength or walking. Group based supervised training was most common.
  - Primary outcomes in 54/90 RCTs was falls/physical function and not mortality. 2/90 RCTs had a primary outcome of cardiac risk factors but not MACE.
  - All-Cause Mortality: (56 RCTs; N = 26,017)
    - RR 0.93 (95% CI 0.83 to 1.04)
    - 5.5% intervention vs 5.8% control
  - Subgroup apparently healthy though including nursing home patients (39 RCTs)
    - Mortality RR 0.96 (95% CI 0.87 to 1.06)
  - Subgroup “clinical populations” (16 RCTs) including cancer, dementia, CVD, renal, MSK or metabolic disease
    - Mortality RR 0.67 (95% CI 0.48 to 0.95)

- We reviewed four of the largest RCTs in this SR. Three were not designed to look at mortality as a primary outcome, as their primary outcomes were falls or depression, hence mortality outcomes were underpowered. The other was a cluster RCT designed to look at mortality as a primary outcome however only 26% of participants attended at least one session and the study was underpowered. In addition, it is unclear if this was primary or secondary prevention. Two RCTs reported cardiometabolic risk factor change but did not report MACE.
- **Harris 2019:** 2 RCTs combined in one publication
  - Two RCTs of a 12-week intervention with long term observational follow-up, not in the above SR (N = 1,297; age 45-75; 62% female; 82% self-report general health “very good or good”)
  - Primary care practices recruiting patients into nurse supervised intervention which encouraged 3,000 steps in 30 minutes per day for 12 weeks versus usual care. Three- or 4-year follow-up using primary care data.
  - Non-fatal CV events hazard ratio (HR) 0.24 (95% CI 0.07 to 0.77)
  - Non-fatal and fatal CV events HR 0.34 (95% CI 0.12 to 0.91)

### Secondary prevention

- **Dibben 2021:** Cochrane SR
  - Exercise-based cardiac rehabilitation with at least 6 months follow-up compared to a “no exercise” control
  - 85 RCTs; N = 23,340 with known coronary heart disease; mean age range 47-77 years
  - Fatal and/or nonfatal MI
    - 6 to 12 months (24 RCTs; N = 7,423)
      - RR 0.72 (95% CI 0.55 to 0.93)
      - 3.7% versus 4.8% control
    - >12 to 36 months (12 RCTs, N = 9,565)
      - RR 1.07 (95% CI 0.91 to 1.27)
      - 5.5% versus 5.0% control
    - 3 years (10 RCTs; N = 1,560)
      - RR 0.67 (95% CI 0.5 to 0.9)
      - 8.4% versus 13% control
  - CV mortality
    - 6 to 12 months (17 RCTs; N = 5,360)
      - RR 0.88 (95% CI 0.68 to 1.14)
      - 3.9% versus 4.5% control
    - >12 to 36 months (4 RCTs; N = 3,614)
      - RR 0.77 (95% CI 0.63 to 0.93)
      - 10.7% versus 13.6% control
    - 3 years (8 RCTs; N = 1,392)
      - RR 0.58 (95% CI 0.43 to 0.78)
      - 8.1% versus 14.2% control

- All-cause mortality
  - 6 to 12 months (25 RCTs; N = 8,823)
    - RR 0.87 (95% CI 0.73 to 1.04)
    - 5% versus 5.7% control
  - >12 to 36 months (16 RCTs; N = 11,073)
    - RR 0.90 (95% CI 0.80 to 1.02)
    - 8.3% versus 9.1% control
  - 3 years (11 RCTs; N = 3,828)
    - RR 0.91 (95% CI 0.75 to 1.10)
    - 25% versus 25.6% control
- **Abell 2017: SR**
  - 69 RCTs; N = 13,423 with established coronary heart disease; median duration 3 years; mean age 54; 17% female
  - Evaluating 72 exercise interventions comparing cardiac rehabilitation versus usual care
    - All interventions used aerobic training with 54% also including resistance training or calisthenic body-weight exercises, 80% group exercise, with only 18% containing sessions that were entirely unsupervised
    - Mean duration of interventions 3 months; median frequency 3 times per week; each session lasted a mean of 49 minutes (SD = 19 minutes)
  - MI (41 RCTs; N = 9,940)
    - RR 0.80 (95% CI 0.70 to 0.92)
    - 6.7% versus 8.4% usual care
  - CV mortality (31 RCTs; N = 6,926)
    - RR 0.74 (95% CI 0.65 to 0.86)
    - 8.2% versus 11.3% usual care
  - All-cause mortality (47 RCTs; N = 11,279)
    - RR 0.90 (95% CI 0.83 to 0.99)
    - 12.1% versus 13.8% usual care
  - No significant difference found in risk reduction when subgroup analyses were performed comparing groups that exercised  $\geq 150$  minutes/week versus  $< 150$  minutes/week.
- **Posadzki 2020: SR of SRs**
  - 150 Cochrane SRs; 288 RCTs; N = 485,110
  - The SRs included RCTs that evaluated only physical activity versus usual care and included both healthy patients and patients with a variety of health conditions, evaluating a variety of health outcomes
  - Age ranged from 3-85 and included children with asthma, adults with a variety of malignancies, mental health conditions, and fibromyalgia among others
  - 8 Cochrane SRs in patients with CVD were analyzed separately (166 RCTs; N = 24,275); 75% of outcomes were from a single systematic review on CV rehabilitation.
  - All-cause mortality
    - RR 0.85 (95% CI 0.76 to 0.96)

- By frequency:
    - Up to 3 times per week RR 0.63 (95% CI 0.39 to 1.00)
    - More than 3 times per week RR 0.87 (95% CI 0.78 to 0.98)
  - By time per session (average time not reported)
    - Up to 60 min RR 0.56 (95% CI 0.35 to 0.91)
    - More than 60 min RR 0.88 (95% CI 0.79 to 0.97)
- **Long 2018:** Cochrane SR
  - Comparing exercise-based cardiac rehabilitation to usual care specifically for patients with stable angina
  - Found only 3 RCTs with outcomes on all-cause mortality and acute MI
    - 3 RCTs; N = 195-254; age 52-60; 0% females; mean duration 52 weeks
  - No statistically significant findings

### Limitations

- For primary prevention, evidence is insufficient to make any recommendation
  - In the SR, RCTs did not define what “apparently healthy” meant and some of these RCTs were in a nursing home population
  - MACE was not a primary outcome in any of the RCTs.
- Most studies reported as RCTs had a short intervention period with longer term observational follow-up
- Results in meta-analyses showed wide variation in point estimates and confidence intervals
- Interventions varied in composition (for example walking, biking, swimming; aerobic versus resistance; supervised versus non-supervised), intensity (for example some specified heart rate percentage or maximal oxygen uptake [VO<sub>2</sub>max]); and duration of exposure (length of workouts and frequency of workouts)
- Risk of bias in RCTs involves inherent inability to blind the intervention though most trials blinded the outcome assessors
- Many RCTs in the SRs do not report withdrawals/non-adherence; attrition was “high” in 23% of SRs (**Posadzki 2020**)

### **CONTEXT**

CV rehabilitation is a complex intervention that may involve a variety of therapies, including exercise, risk factor education, behaviour change, psychological support, and strategies that are aimed at targeting traditional risk factors for CV disease. Most involve weekly sessions for 6-12 weeks (**West 2012**). Early SRs of CV rehabilitation rely on RCTs before the introduction of thrombolysis, primary angioplasty, secondary prevention with aspirin, beta-blockers, ACE-inhibitors and statins (**West 2012**). Exercise has proven health benefits in multiple other conditions like chronic pain, osteoarthritis, mental health (**Korownyk 2022**).

### Major guideline recommendations

All major guidelines recommend physical activity to reduce CV outcomes (*Table 5*). One-hundred and fifty minutes of exercise a week is often recommended but the evidence base for this is limited.

## REFERENCES

- Abell, B, Galsziou P, Hoffman T. The contribution of individual exercise training components to clinical outcomes in randomised controlled trials of cardiac rehabilitation: a systematic review and meta-regression. *Sports Med Open*. 2017;3:1-31.
- Becker C, Kron M, Lindemann U, Sturm E, Eichner B, Walter-Jung B, et al. Effectiveness of a multifaceted intervention on falls in nursing home residents. *J Am Geriatr Soc*. 2003;51:306–313.
- Dibben G, Faulkner J, Oldridge N, Rees K, Thompson DR, Zwisler AD, et al. Exercise-based cardiac rehabilitation for coronary heart disease. *Cochrane Database Syst Rev*. 2021(11). Art. No. CD001800.
- Garcia-Hermoso A, Ramirez-Velez R, Saez de Asteasu M, Martinez-Elilla N, Zambom-Ferraresi F, Valenzuela P, et al. Safety and effectiveness of long-term exercise interventions in older adults: a systematic review and meta-analysis of randomized controlled trials. *Sports Med*. 2020;50:1095-1106.
- Grundy SM, Stone NJ, Bailey AL, et al. 2018 AHA/ACC/AACVPR/AAPA/ABC/ACPM/ADA/AGS/APhA/ASPC/NLA/PCNA guideline on the management of blood cholesterol: a report of the American College of Cardiology/American Heart Association Task Force on Clinical Practice Guidelines. *Circulation*. 2019;139:e1082-e1143. doi: 10.1161/CIR.0000000000000625
- Harris T, Limb ES, Hosking F, Carey I, DeWilde S, Furness C, et al. Effect of pedometer-based walking interventions on long-term health outcomes: prospective 4-year follow-up of two randomised controlled trials using routine primary care data. *PLoS Med*. 2019;16(6):e1002836.
- Korownyk CS, Montgomery L, Young J, Moore S, Singer AG, MacDougall P, et al. PEER simplified chronic pain guideline: management of chronic low back, osteoarthritic, and neuropathic pain in primary care. *Can Fam Physician*. 2022;68(3):179-190.
- Long L, Anderson L, Dewhirst AM, He J, Bridges C, Gandhi M, et al. Exercise-based cardiac rehabilitation for adults with stable angina. *Cochrane Database of Syst Rev*. 2018; Issue 2. Art. No. CD012786.
- Mach F, Baigent C, Catapano AL, Koskinas KC, Casula M, Badimon L et al. 2019 ESC/EAS Guidelines for the management of dyslipidaemias: lipid modification to reduce cardiovascular risk. *Eur Heart J*. 2020;41(1):111-188. doi: 10.1093/eurheartj/ehz455.
- The Management of Dyslipidemia for Cardiovascular Risk Reduction Work Group. VA/DoD clinical practice guideline for the management of dyslipidemia for cardiovascular risk reduction. US Department of Veterans Affairs, Department of Defense. 2020. 127 p.
- Munro JF, Nicholl JP, Brazier JE, Davey R, Cochrane T. Cost effectiveness of a community based exercise programme in over 65 year olds: cluster randomised trial. *J Epidemiol Community Health*. 2004; 58(12):1004-1010.
- Pearson GJ, Thanassoulis G, Anderson TJ, et al. 2021 Canadian Cardiovascular Society guidelines for the management of dyslipidemia for the prevention of cardiovascular disease in adults. *Can J Cardiol*. 2021;37:1129-1150.

- Posadzki P, Pieper D, Bajpai R, Makaruk H, Konsgen N, Neuhaus A, et al. Exercise/physical activity and health outcomes: an overview of Cochrane systematic reviews. *BMC Public Health*. 2020;20:1-12.
- Underwood M, Lamb SE, Eldridge S, Sheehan B, Slowther AM, Spencer A, et al. Exercise for depression in elderly residents of care homes: a cluster-randomised controlled trial. *Lancet*. 2013;382(9886):41-49.
- US Preventive Services Task Force. Statin use for the primary prevention of cardiovascular disease in adults US Preventive Services Task Force recommendation statement. *JAMA*. 2022;328(8):746-753. doi:10.1001/jama.2022.13044
- Visseren FL, Mach F, Smulders YM, Carballo D, Koskinas KC, Bäck M et al. ESC Guidelines on cardiovascular disease prevention in clinical practice: Developed by the Task Force for cardiovascular disease prevention in clinical practice with representatives of the European Society of Cardiology and 12 medical societies With the special contribution of the European Association of Preventive Cardiology (EAPC). *Eur Heart J*. 2021;42(34):3227-337.
- Vetter NJ, Lewis PA, Ford D. Can health visitors prevent fractures in elderly people?. *BMJ*. 1992;304(6831):888-890.
- West R, Jones D, Henderson A. Rehabilitation after myocardial infarction trial (RAMIT): multi-centre randomised controlled trial of comprehensive cardiac rehabilitation in patients following acute myocardial infarction. *Heart*. 2012;98(8):637-644.

## METHODS

- Pubmed search November 1, 2022: “cardiac rehabilitation” “mortality” “stroke” “myocardial infarction” filtered by Systematic Review 2015-2022: yielded 202 results
- Pubmed search November 1, 2022: “major adverse CV events” “exercise” “physical activity” filtered by Systematic Review: yielded 9 results
- Pubmed search on November 8, 2022: “CV disease” “exercise” filtered by Systematic Review, 2017-2022: yielded 350 results
- Cochrane search November 9, 2022 using “CV disease” AND (“cardiac rehabilitation” OR “physical activity” OR “exercise”).
- Google Scholar search November 9, 2022 using “CV disease” AND exercise AND systematic review. First 5 pages reviewed.
- “Similar article search” from retrieved systematic reviews did not reveal additional papers
- References from International Guidelines: one additional systematic review on Cardiac Rehab (Abell)
- Reference from systematic review (Patnode) relating to 2 exercise trials.
- Communication with author of systematic review (Posadzki) for meta-analysis of subgroup of mortality data in patients with CVD.
- Pubmed search December 8, 2022: “primary prevention” “exercise” “CV events” “mortality” filtered by “systematic review” revealed one additional systematic review (**Garcia-Hermoso 2020**)

## APPENDIX

*Table 1: Systematic review baseline characteristics*

| Study                       | No. studies | Types of studies | Duration of follow-up                     | Mean age (years) | Intervention                 | Comparator            | Included population                                                                                                                                                                                                                                         | Comments |
|-----------------------------|-------------|------------------|-------------------------------------------|------------------|------------------------------|-----------------------|-------------------------------------------------------------------------------------------------------------------------------------------------------------------------------------------------------------------------------------------------------------|----------|
| <b>Secondary prevention</b> |             |                  |                                           |                  |                              |                       |                                                                                                                                                                                                                                                             |          |
| Long 2018                   | 7           | RCTs             | 6-12 months                               | 50-66            | Exercise-based cardiac rehab | Usual care            | Patients with stable angina                                                                                                                                                                                                                                 |          |
| Dibben 2021                 | 85          | RCTs             | 6-12 months;<br>12-48 months;<br>>3 years | 47-77            | Exercise-based cardiac rehab | “No exercise” control | Patients with coronary heart disease (50% MI alone, 6% angina alone, 8% post-CABG, 8% post-PCI, 31% mixed population of patients with CHD)                                                                                                                  |          |
| Abell 2017                  | 69          | RCTs             | Mean 3 years                              | 54               | Cardiac rehabilitation       | Usual care            | A large proportion of trials (43/69; 62%) included only patients after MI; however, those published from 1990 onward often included patients diagnosed with CAD (n = 8; 12%), post-PCI (n = 5; 7%), post-CABG (n = 2; 3%) or a combination of these cardiac |          |



| Study                                 | No. studies | Types of studies | Duration of follow-up | Mean age (years) | Intervention                | Comparator | Included population                                                                           | Comments                                                                                             |
|---------------------------------------|-------------|------------------|-----------------------|------------------|-----------------------------|------------|-----------------------------------------------------------------------------------------------|------------------------------------------------------------------------------------------------------|
|                                       |             |                  |                       |                  |                             |            | etiologies (n = 11; 16%).                                                                     |                                                                                                      |
| Posadski 2020                         | 8           | SRs              | NR                    | NR               | Any exercise                | Usual care | Patients with CVD with an outcome of mortality                                                | Overall, 130 SRs with 2,888 RCTs were reviewed but only 8 reported on mortality in patients with CVD |
| <b>Primary &amp; mixed prevention</b> |             |                  |                       |                  |                             |            |                                                                                               |                                                                                                      |
| Garcia-Hermosa 2020                   | 56          | RCTs             | 52-208 weeks          | 74               | Any exercise >1 year        | Usual care | Primary care and “clinical population” including cancer, DM; however, no noted CVD population | Overall, looked at 90 RCTs, but only 56 reported on mortality, none on other CV outcomes             |
| Harris 2019                           | 2           | RCTs             | 3-4 years             | 47-75            | 12-week supervised exercise | Usual care | Healthy community adults                                                                      | Follow-up 4 years after 12-week intervention; using primary care data                                |

CABG = coronary artery bypass graft; CAD = coronary artery disease; CHD = coronary heart disease; CV = cardiovascular; CVD = cardiovascular disease; DM = diabetes mellitus; MI = myocardial infarction; NR = not reported; PCI = percutaneous coronary intervention; RCT = randomized controlled trial; SR = systematic review

*Table 2: Systematic review efficacy data separated by primary/mixed prevention, secondary prevention, and RCT data*

| Outcome                     | Study                       | Effect estimate               | SS or NSS | No. patients | Quality of evidence* | Notes for indirectness                                                                                                                         | Publication bias                                                               |
|-----------------------------|-----------------------------|-------------------------------|-----------|--------------|----------------------|------------------------------------------------------------------------------------------------------------------------------------------------|--------------------------------------------------------------------------------|
| <b>Secondary prevention</b> |                             |                               |           |              |                      |                                                                                                                                                |                                                                                |
| All-cause mortality         | Long 2018                   | RR 1.01 (95% CI 0.18 to 5.67) | NSS       | 195          | High                 | Indirect due to very selective search for patients with “only” stable angina which does not reflect the average patient (excluded many trials) | Not assessed                                                                   |
| All-cause mortality         | Dibben 2021 (6-12 months)   | RR 0.87 (95% CI 0.73 to 1.04) | NSS       | 8,823        | High                 | No major concerns                                                                                                                              | Assessed with funnel plot; no concerns                                         |
| All-cause mortality         | Dibben 2021 (>12-36 months) | RR 0.90 (95% CI 0.80 to 1.02) | NSS       | 11,073       | High                 | No major concerns                                                                                                                              | Assessed with funnel plot; no concerns                                         |
| All-cause mortality         | Dibben 2021 (>36 months)    | RR 0.91 (95% CI 0.75 to 1.10) | NSS       | 3,828        | High                 | No major concerns                                                                                                                              | Assessed with funnel plot; no concerns                                         |
| All-cause mortality         | Abell 2017                  | RR 0.90 (95% CI 0.83 to 0.99) | SS        | 11,279       | High                 | No major concerns                                                                                                                              | Assessed with funnel plot; no concerns                                         |
| All-cause mortality         | Posadski 2020               | RR 0.85 (95% CI 0.76 to 0.96) | SS        | 24,275       | High                 | Patients had CVD in the 8 SRs reviewed; authors indicate that of 114 CSRs overall, indirectness not a concern but imprecision (65%) and        | “Publication bias was the least frequent reason for downgrading in 26 (17.3%)” |

| Outcome                  | Study                       | Effect estimate               | SS or NSS | No. patients | Quality of evidence* | Notes for indirectness   | Publication bias                                            |
|--------------------------|-----------------------------|-------------------------------|-----------|--------------|----------------------|--------------------------|-------------------------------------------------------------|
|                          |                             |                               |           |              |                      | inconsistency (43%) were |                                                             |
| CV mortality             | Dibben 2021 (6-12 months)   | RR 0.88 (95% CI 0.68 to 1.14) | NSS       | 5,360        | High                 | No major concerns        | Assessed with funnel plot; no concerns                      |
| CV mortality             | Dibben 2021 (>12-36 months) | RR 0.77 (95% CI 0.63 to 0.93) | SS        | 3,614        | High                 | No major concerns        | Assessed with funnel plot; no concerns                      |
| CV mortality             | Dibben 2021 (>36 months)    | RR 0.58 (95% CI 0.43 to 0.78) | SS        | 1,392        | High                 | No major concerns        | Assessed with funnel plot; no concerns                      |
| CV mortality             | Abell 2017                  | RR 0.74 (95% CI 0.65 to 0.86) | SS        | 6,926        | High                 | No major concerns        | Assessed with funnel plot; no concerns                      |
| Fatal and/or nonfatal MI | Dibben 2021 (6-12 months)   | RR 0.72 (95% CI 0.55 to 0.93) | SS        | 7,423        | High                 | No major concerns        | Figure 8 (MI at >12-36-month follow-up) shows some concerns |
| Fatal and/or nonfatal MI | Dibben 2021 (>12-36 months) | RR 1.07 (95% CI 0.91 to 1.27) | NSS       | 9,565        | High                 | No major concerns        | Figure 8 (MI at >12-36-month follow-up) shows some concerns |
| Fatal and/or nonfatal MI | Dibben 2021 (>36 months)    | RR 0.67 (95% CI 0.50 to 0.90) | SS        | 1,560        | High                 | No major concerns        | Assessed with funnel plot; no concerns                      |

| Outcome                               | Study               | Effect estimate               | SS or NSS | No. patients | Quality of evidence* | Notes for indirectness                                                                                                                         | Publication bias                       |
|---------------------------------------|---------------------|-------------------------------|-----------|--------------|----------------------|------------------------------------------------------------------------------------------------------------------------------------------------|----------------------------------------|
| Acute MI                              | Long 2018           | RR 0.33 (95% CI 0.07 to 1.63) | NSS       | 254          | High                 | Indirect due to very selective search for patients with “only” stable angina which does not reflect the average patient (excluded many trials) | Not assessed                           |
| Acute MI                              | Abell 2017          | RR 0.80 (95% CI 0.70 to 0.92) | SS        | 9,940        | High                 | No major concerns                                                                                                                              | Assessed with funnel plot; no concerns |
| <b>Primary &amp; mixed prevention</b> |                     |                               |           |              |                      |                                                                                                                                                |                                        |
| Mortality                             | Garcia-Hermosa 2020 | RR 0.93 (95% CI 0.83 to 1.04) | NSS       | 26,017       | High                 | Used “PEDRO” score Physiotherapy Evidence Database out of avg 6.1/11 with 40.2% failing to conceal allocation                                  | Assessed with funnel plot; no concerns |
| <b>RCTs</b>                           |                     |                               |           |              |                      |                                                                                                                                                |                                        |
| Non-fatal CV events                   | Harris 2019         | 0.27 (95% CI 0.08 to 0.88)    | SS        | 1,321        | 4/7                  | Patients were invited to participate; 80% rated general health as good or very good                                                            |                                        |
| Non-fatal and fatal CV events         | Harris 2019         | 0.34 (95% CI 0.12 to 0.91)    | SS        | 1,321        | 4/7                  | Patients were invited to participate; 80% rated general health as good or very good                                                            |                                        |

\*Used AMSTAR for SRs (*Table 3A*); used Cochrane risk of bias tool for RCTs (*Table 3B*)

AMSTAR = A Measurement Tool for Assessment of Multiple Systematic Reviews; CV = cardiovascular; CVD = cardiovascular disease; MI = myocardial infarction; NSS = not statistically significant; RCT = randomized controlled trial; RR = risk ratio; SR = systematic review; SS = statistically significant

Table 3A: Quality assessment of included systematic reviews using AMSTAR

| Author, Year        | Duplicate study selection and data extraction? | Comprehensive literature search performed? | Characteristics of the included studies provided? | Scientific quality of included studies assessed & documented? | Methods used to combine the findings of studies appropriate? | Was the conflict of interest stated? | Publication bias formally assessed? | Overall quality |
|---------------------|------------------------------------------------|--------------------------------------------|---------------------------------------------------|---------------------------------------------------------------|--------------------------------------------------------------|--------------------------------------|-------------------------------------|-----------------|
| Long 2018           | Yes                                            | Yes                                        | Yes                                               | Yes                                                           | Yes                                                          | Yes                                  | No                                  | High            |
| Dibben 2021         | Yes                                            | Yes                                        | Yes                                               | Yes                                                           | Yes                                                          | Yes                                  | Yes                                 | High            |
| Abell 2017          | Yes                                            | Yes                                        | Yes                                               | Yes                                                           | Yes                                                          | Yes                                  | Yes                                 | High            |
| Posadski 2020       | 1 select, 2 extract                            | Just Cochrane (definition)                 | Yes                                               | Yes                                                           | Yes                                                          | Yes                                  | Yes                                 | High            |
| Garcia-Hermosa 2020 | Yes                                            | Yes                                        | Yes                                               | Yes                                                           | Yes                                                          | Yes                                  | Yes                                 | High            |

AMSTAR = Assessment of Multiple Systematic Reviews

Table 3B: Quality assessment of included randomized controlled trials using Cochrane Risk of Bias tool

| Study       | Random sequence generation | Allocation concealment | Blinding of participants | Blinding of personnel/physicians | Blinding of outcome assessors | Loss to follow up                            | Selective outcome reporting | Comments                                                                       |
|-------------|----------------------------|------------------------|--------------------------|----------------------------------|-------------------------------|----------------------------------------------|-----------------------------|--------------------------------------------------------------------------------|
| Harris 2019 | Yes                        | Yes                    | NA                       | No                               | Yes                           | At 4 years, control 16% and intervention 18% | No                          | Intervention lasted 12 weeks; follow-up with primary care data at 3 or 4 years |

NA = not applicable

Table 4: GRADE certainty of evidence for effect of exercise-based cardiac rehabilitation (secondary prevention) on all-cause mortality

**Treatment:** exercise-based cardiac rehabilitation (secondary prevention)

**Outcome:** all-cause mortality

| Study design | No. studies (no. patients) | Risk of bias | Inconsistency | Indirectness                                                                                                                         | Imprecision                                              | Publication bias | Effect estimate (range) | Median (IQR)        | Overall certainty                                                                     |
|--------------|----------------------------|--------------|---------------|--------------------------------------------------------------------------------------------------------------------------------------|----------------------------------------------------------|------------------|-------------------------|---------------------|---------------------------------------------------------------------------------------|
| SR           | 3 (3,828-24,275)           | Not serious  | Not serious   | Serious<br><br>Evidence based on exercise-based cardiac rehabilitation; unclear whether this includes interventions beyond exercise. | Serious<br><br>CIs included potential benefits and harms | Undetected       | RR 0.85-0.91            | RR 0.90 (0.85-0.91) | Low<br><br>This outcome has two serious (-2) therefore <b>downgrade by two to low</b> |

CI = confidence interval; GRADE = Grading of Recommendations, Assessment, Development, and Evaluations; IQR = inter-quartile range; RR = risk ratio; SR = systematic review

*Table 5: Summary of recommendations from major guidelines published within the past 5 years*

| Our question                                                                                                                 | 2018 AHA <sup>1</sup>                                                                                                                                                                 | 2019 ESC Dyslipidemia <sup>2</sup>                                                                                                                                                                                 | 2020 VA <sup>3</sup>                                                                                                                                                                             | 2021 CCS <sup>4</sup>                                                                                                                                        | 2021 ESC CVD Prevention <sup>5</sup>                                                                                                                                                                                                                                                                                          | 2022 USPSTF <sup>6</sup>                                                                                                                                                               |
|------------------------------------------------------------------------------------------------------------------------------|---------------------------------------------------------------------------------------------------------------------------------------------------------------------------------------|--------------------------------------------------------------------------------------------------------------------------------------------------------------------------------------------------------------------|--------------------------------------------------------------------------------------------------------------------------------------------------------------------------------------------------|--------------------------------------------------------------------------------------------------------------------------------------------------------------|-------------------------------------------------------------------------------------------------------------------------------------------------------------------------------------------------------------------------------------------------------------------------------------------------------------------------------|----------------------------------------------------------------------------------------------------------------------------------------------------------------------------------------|
| “In patients with/at risk of CVD, does increasing physical activity (including cardiac rehab) reduce the risk of CV events?” | “... advised to engage in aerobic physical activity 3-4 sessions per week, lasting on average 40 minutes per session and involving moderate-to vigorous-intensity physical activity.” | “The reduction of LDL-C levels induced by regular physical exercise is even smaller. The benefits of weight reduction and physical exercise on the CV risk profile likely impact on other risk factors, especially | “Suggest regular aerobic activity of any intensity or duration”. WEAK Note Physical Activity Guideline for Americans recommends 150 min moderate, 75 min vigorous but evidence limitations. Also | “... continue to recommend that all adults should accumulate at least 150 minutes of moderate to vigorous aerobic activity per week.” (STRONG, high quality) | “It is recommended to reduce sedentary time to engage in at least light activity throughout the day to reduce all-cause and CV mortality and morbidity.” Class I Recommendation.<br><br>“It is recommended for adults of all ages to strive for at least 150 - 300 min a week of moderate intensity or 75 - 150 min a week of | “The USPSTF has made several recommendations related to the prevention of CVD in adults... behavioral counseling to promote a healthy diet and physical activity for CVD prevention in |

| Our question | 2018 AHA <sup>1</sup> | 2019 ESC Dyslipidemia <sup>2</sup>                                                                                                                                                                                                                                                                                  | 2020 VA <sup>3</sup>                                                                                                                                                                       | 2021 CCS <sup>4</sup> | 2021 ESC CVD Prevention <sup>5</sup>                                                                                                                                                                                                                                                                                                                                                                                                                                                                                                                                                                                                                                                                                                                                             | 2022 USPSTF <sup>6</sup>                                                                                                                                  |
|--------------|-----------------------|---------------------------------------------------------------------------------------------------------------------------------------------------------------------------------------------------------------------------------------------------------------------------------------------------------------------|--------------------------------------------------------------------------------------------------------------------------------------------------------------------------------------------|-----------------------|----------------------------------------------------------------------------------------------------------------------------------------------------------------------------------------------------------------------------------------------------------------------------------------------------------------------------------------------------------------------------------------------------------------------------------------------------------------------------------------------------------------------------------------------------------------------------------------------------------------------------------------------------------------------------------------------------------------------------------------------------------------------------------|-----------------------------------------------------------------------------------------------------------------------------------------------------------|
|              |                       | <p>hypertension and diabetes.”</p> <p>“Regular physical exercise reduces plasma TG levels over and above the effect of weight reduction.”</p> <p>“Aerobic physical activity, such as 2530 km of brisk walking per week (or any equivalent activity), may increase HDL-C levels by 0.080.15 mmol/L (3.16 mg/dL)”</p> | <p>evidence benefit at lower than this.”</p> <p>“... a structured, exercise-based cardiac rehabilitation program for patients with recent occurrence of coronary heart disease” STRONG</p> |                       | <p>vigorous intensity aerobic PA, or an equivalent combination thereof, to reduce all-cause mortality, CV mortality, and morbidity.”<br/>Class I, Level A Recommendation</p> <p>“It is recommended that adults who cannot perform 150 min of moderate-intensity PA a week should stay as active as their abilities and health condition allow”<br/>Class I, Level B Recommendation</p> <p>“It is recommended to reduce sedentary time to engage in at least light activity throughout the day to reduce all-cause and CV mortality and morbidity.”<br/>Class I, Level B Recommendation</p> <p>“Performing resistance exercise, in addition to aerobic activity, is recommended on 2 or more days per week to reduce all-cause mortality”<br/>Class I, Level B Recommendation</p> | <p>adults (with and without cardiovascular risk factors), and behavioral interventions to prevent obesity-related morbidity and mortality in adults.”</p> |

| Our question | 2018 AHA <sup>1</sup> | 2019 ESC<br>Dyslipidemia <sup>2</sup> | 2020 VA <sup>3</sup> | 2021 CCS <sup>4</sup> | 2021 ESC CVD Prevention <sup>5</sup>                                                                                                                                                                                                                                            | 2022 USPSTF <sup>6</sup> |
|--------------|-----------------------|---------------------------------------|----------------------|-----------------------|---------------------------------------------------------------------------------------------------------------------------------------------------------------------------------------------------------------------------------------------------------------------------------|--------------------------|
|              |                       |                                       |                      |                       | <p>“Lifestyle interventions, such as group or individual education, behaviour-change techniques, telephone counseling, and use of consumer-based wearable activity trackers, should be considered to increase PA participation.”<br/>Class IIa, Level B<br/>Recommendation.</p> |                          |

<sup>1</sup>Grundy 2018; <sup>2</sup>Mach 2020; <sup>3</sup>Management of Dyslipidemia for Cardiovascular Risk Reduction Work Group 2020; <sup>4</sup>Pearson 2021; <sup>5</sup>Visseren 2021; <sup>6</sup>US Preventive Services Task Force 2022

CV = cardiovascular; CVD = cardiovascular disease; HDL-C = high-density lipoprotein-cholesterol; LDL-C = low-density lipoprotein-cholesterol; PA = physical activity; TG = triglycerides



## **CHAPTER 5: MEDITERRANEAN DIET**

### **CLINICAL QUESTION**

In patients with/at risk of cardiovascular disease, does the Mediterranean Diet reduce the risk of cardiovascular events?

### **BOTTOM LINE**

The Mediterranean diet reduces the risk of cardiovascular (CV) events in both primary and secondary prevention. Best estimates from randomized controlled trials (RCTs) suggest a 25-30% relative risk (RR) reduction in MACE over ~5-7 years.

### **EVIDENCE**

All evidence is statistically significant unless noted. Four systematic reviews (SRs) (**Rees 2019, Becerra-Tomas 2020, Grosso 2017, Papadaki 2020**) were found and consistently highlighted three RCTs (**Estruch 2013, de Lorgeril 1994, Singh 2002**). Results were reported on a per-trial basis due to differences in patient populations. These four SRs found similar results overall. One recently published RCT not captured in the above SRs was found (**Delgado-Lista 2022**). Of note is that the key RCTs had dietitians supporting the dietary interventions with individual and/or group sessions. Quality assessment of included SRs and RCTs can be found in *Tables 1A* and *1B*. GRADE certainty of evidence evaluation can be found in *Table 2*.

#### **Primary prevention**

- **PREDIMED**: trial that reported on clinical outcomes (**Estruch 2013, Estruch 2018**)
  - Three-arm study of Mediterranean diet supplemented with extra virgin olive oil (EVOO) versus Mediterranean diet supplemented with nuts versus a low-fat diet (7,447 patients at high risk of cardiovascular disease (CVD); mean age 67; 57% female; followed for 4.8 years)
  - Composite clinical events (CVD mortality, total mortality, myocardial infarction [MI], stroke)
    - Hazard ratio (HR) 0.70 (95% confidence interval [CI] 0.58 to 0.85)
  - Stroke
    - HR 0.60 (95% CI 0.45 to 0.80)
  - CV mortality, total mortality and MI were not statistically significant when analyzed separately
  - Limitations: protocol deviations in regards to randomization were identified in PREDIMED RCT at clinic sites but republished results were not significantly impacted

#### **Secondary prevention**

- **De Lorgeril 1994/Lyon Diet Heart Study**
  - Randomized, single-blinded trial of 605 patients that had previously suffered a MI; comparing Mediterranean diet to a prudent Western-type diet, followed for a mean of 46 months
  - Total mortality

- RR 0.44 (95% CI 0.21 to 0.92)
- CVD mortality
  - RR 0.35 (95% CI 0.15 to 0.82)
- CVD death and non-fatal MI
  - RR 0.28 (95% CI 0.15 to 0.52)
- Limitations
  - Statin use unknown
- **Delgado-Lista 2022**
  - RCT comparing Mediterranean diet vs. low-fat diet
  - N = 1,002 Spanish patients; mean age 59.5; 18% female; ~7 years follow up; ~87% on statin medication and 98.2% on antiplatelets or anticoagulants
  - Composite outcome (MI, revascularization, ischemic stroke, peripheral arterial disease, CV death) at ~7 years
    - 17% Mediterranean vs 22% low-fat
      - HR ~25% relative risk reduction (statistically significant)
  - Adherence
    - 9% discontinuation in Mediterranean compared to 17% in low-fat

Mixed population (secondary and primary prevention)

- **Singh 2002**
  - Randomized, single-blind trial of 1,000 patients comparing Indo-Mediterranean diet (consisting of whole grains including legumes, fruits, vegetables, nuts and mustard or soybean oil) versus control diet, followed for 2 years total
    - 48% of study population post-MI; 6-7% on statins
  - Total cardiac endpoints (non-fatal MI, fatal MI, sudden cardiac death)
    - RR 0.50 (95% CI 0.34 to 0.73)
  - Limitations
    - Two-thirds of the participants were vegetarians
    - Participants' adherence to the diet was only monitored for 3 weeks
    - Concerns raised about reliability of results after publication (**Horton 2005**)

Limitations

- Use of statin medications was inconsistent, unclear whether this impacts results

**CONTEXT**

The Mediterranean diet generally consists of an abundance of plant foods (including fruits, vegetables, whole grains, nuts and legumes), olive oil as a principal source of fat, cheese and yogurt consumed daily in low to moderate amounts, fish and poultry consumed in low to moderate amounts a few times per week and infrequent consumption of red meat and processed sweets (**McManus 2019**). A visual representation of the Mediterranean diet can be found in this document:

<https://memory.ucsf.edu/sites/memory.ucsf.edu/files/MediterraneanDietHandout.pdf>

### Major guideline recommendations

Refer to *Table 3* for recommendations pertaining to the Mediterranean diet from major guidelines published within the last 5 years.

### REFERENCES

- Becerra-Tomas N, Blanco Mejia S, Vigiouliouk E, Khan T, Kendall CW, Kahleova H, et al. Mediterranean diet, cardiovascular disease and mortality in diabetes: a systematic review and meta-analysis of prospective cohort studies and randomized clinical trials. *Crit Rev Food Sci Nutr.* 2020;6(7):1207-1227.
- De Lorgeril M, Renaud S, Mamelle N, Salen P, Martin JL, Monjaud I, et al. Mediterranean alpha-linolenic acid-rich diet in secondary prevention of coronary heart disease. *Lancet.* 1994;343(8911):1454-1459.
- De Lorgeril M, Salen P, Martin JL, Monjaud I, Delaye J, Mamelle N. Mediterranean diet, traditional risk factors, and the rate of cardiovascular complications after myocardial infarction: final report of the Lyon Diet Heart Study. *Circulation.* 1999;99(6):779-785.
- Delgado-Lista J, Alcalá-Díaz JF, Torres-Peña JD, Quintana-Navarro GM, Fuentes F, García-Ríos A, et al. Long-term secondary prevention of cardiovascular disease with a Mediterranean diet and a low-fat diet (CORDIOPREV): a randomised controlled trial. *Lancet.* 2022;399:1876-1885.
- Estruch R, Ros E, Salas-Salvadó J, Covas MI, Corella D, Arós F, et al. Primary prevention of cardiovascular disease with a Mediterranean diet. *N Engl J Med* 2013;368(14):1279-90. Epub 2013 Feb 25. Erratum in: *N Engl J Med.* 2014;370(9):886.
- Estruch R, Ros E, Salas-Salvado J, Covas MI, Corella D, Aros F, et al. Primary prevention of cardiovascular disease with a Mediterranean diet supplemented with extra-virgin olive oil or nuts. *N Engl J Med.* 2018;378(25):e34.
- Grosso G, Marventano S, Yang J, Micek A, Pajak A, Scalfi L, et al. A comprehensive meta-analysis on evidence of Mediterranean diet and cardiovascular disease: are individual components equal? *Crit Rev Food Sci Nutr.* 2017;57(15):3218-3232.
- Grundy SM, Stone NJ, Bailey AL, et al. 2018 AHA/ACC/AACVPR/AAPA/ABC/ACPM/ADA/AGS/APhA/ASPC/NLA/PCNA guideline on the management of blood cholesterol: a report of the American College of Cardiology/American Heart Association Task Force on Clinical Practice Guidelines. *Circulation.* 2019;139:e1082-e1143. doi: 10.1161/CIR.0000000000000625
- Horton R. Expression of concern: Indo-Mediterranean Diet Heart Study. *Lancet.* 2005;366(9483):354-356.
- Mach F, Baigent C, Catapano AL, Koskinas KC, Casula M, Badimon L et al. 2019 ESC/EAS Guidelines for the management of dyslipidaemias: lipid modification to reduce cardiovascular risk. *Eur Heart J.* 2020;41(1):111-188. doi: 10.1093/eurheartj/ehz455.
- The Management of Dyslipidemia for Cardiovascular Risk Reduction Work Group. VA/DoD clinical practice guideline for the management of dyslipidemia for cardiovascular risk reduction. US Department of Veterans Affairs, Department of Defense. 2020. 127 p.

- McManus KD. A practical guide to the Mediterranean diet. Harvard Health Blog. March 21, 2019. Accessed December 15, 2022 at <https://www.health.harvard.edu/blog/a-practical-guide-to-the-mediterranean-diet-2019032116194>
- Papadaki A, Nolen-Doerr E, Mantzoros CS. The effect of the Mediterranean diet on metabolic health: a systematic review and meta-analysis of controlled trials in adults. *Nutrients*. 2020;12(11):3342.
- Pearson GJ, Thanassoulis G, Anderson TJ, et al. 2021 Canadian Cardiovascular Society guidelines for the management of dyslipidemia for the prevention of cardiovascular disease in adults. *Can J Cardiol*. 2021;37:1129-1150.
- Rees K, Takeda A, Martin N, Ellis L, Wijesekara S, Vepa A, et al. Mediterranean-style diet for the primary and secondary prevention of cardiovascular disease. *Cochrane Database Syst Rev*. 2019;3:CD009825.
- Singh RB, Dubnov G, Niaz MA, Ghosh S, Singh R, Rastogi SS, et al. Effect of an Indo-Mediterranean diet on progression of coronary artery disease in high risk patients (Indo-Mediterranean Diet Heart Study): a randomised single-blind trial. *Lancet*. 2002;360(9344):1455-1461.
- US Preventive Services Task Force. Statin use for the primary prevention of cardiovascular disease in adults US Preventive Services Task Force recommendation statement. *JAMA*. 2022;328(8):746-753. doi:10.1001/jama.2022.13044
- Visseren FL, Mach F, Smulders YM, Carballo D, Koskinas KC, Bäck M et al. ESC Guidelines on cardiovascular disease prevention in clinical practice: Developed by the Task Force for cardiovascular disease prevention in clinical practice with representatives of the European Society of Cardiology and 12 medical societies With the special contribution of the European Association of Preventive Cardiology (EAPC). *Eur Heart J*. 2021;42(34):3227-337.

## METHODS

Inclusion criteria were SRs that included RCTs that studied the Mediterranean diet compared to a control and reported on patient important outcomes. RCTs were included if they were published following the last SR.

- A search in PubMed was completed with the keywords “Mediterranean diet” and “cardiovascular” using filters for randomized control trials.
- In addition, a search in the MEDLINE database was completed using a search strategy that included keywords such as “mediterranean diet”, “major cardiovascular event” and “mortality” along with related terminology. A meta-analysis filter was used and the full search strategy is available upon request.
- A grey literature search was completed to find any additional randomized control trials that came out in the last 5 years.
- Full text review and data extraction was completed by two authors independently.

## APPENDIX

*Table 1A: Quality assessment of included systematic reviews using AMSTAR*

| Systematic review, year | Dual selection and extraction | Comprehensive literature search | Characteristics of included studies | Quality assessment of studies | Pooled estimates | Conflicts of interests stated | Total score |
|-------------------------|-------------------------------|---------------------------------|-------------------------------------|-------------------------------|------------------|-------------------------------|-------------|
| Becerra-Tomas 2020      | 1                             | 1                               | 1                                   | 1                             | 1                | 1                             | 6           |
| Papadaki 2020           | 1                             | 1                               | 1                                   | 1                             | 1                | 1                             | 6           |
| Rees 2019               | 1                             | 1                               | 1                                   | 1                             | 1                | 1                             | 6           |
| Grosso 2017             | 1                             | 1                               | 1                                   | 1                             | 1                | 0                             | 5           |

AMSTAR = Assessment of Multiple Systematic Reviews

*Table 1B: Quality assessment of included randomized control trials using the Jadad scale*

| Study, year        | Was it randomized? | Was randomization process appropriate? | Was it double blind? | Was blinding process appropriate? | Were drop-outs described? | Deductions (for inappropriate randomization or blinding) | Total score |
|--------------------|--------------------|----------------------------------------|----------------------|-----------------------------------|---------------------------|----------------------------------------------------------|-------------|
| Delgado-Lista 2022 | 1                  | 1                                      | 1                    | 1                                 | 1                         | -1                                                       | 4           |
| De Lorgeril 1994   | 1                  | 1                                      | 0                    | 0                                 | 1                         | 0                                                        | 3           |
| Singh 2002         | 1                  | 1                                      | 0                    | 0                                 | 1                         | -1                                                       | 2           |
| Estruch 2013/2018  | 1                  | 1                                      | 0                    | 0                                 | 1                         | 0                                                        | 3           |

*Table 2: GRADE certainty of evidence for effect of the Mediterranean diet (primary prevention) on composite clinical events*

**Treatment:** Mediterranean diet (primary prevention)

**Outcome:** composite clinical events (CVD mortality, total mortality, MI, and stroke)

| Study design | No. studies (no. patients) | Risk of bias                                                                                                                                                               | Inconsistency | Indirectness | Imprecision | Publication bias | Effect estimate               | Certainty                                                                                       |
|--------------|----------------------------|----------------------------------------------------------------------------------------------------------------------------------------------------------------------------|---------------|--------------|-------------|------------------|-------------------------------|-------------------------------------------------------------------------------------------------|
| SR of RCTs   | 1 (7,447)                  | Serious<br><br>Original publication was retracted due to concerns re: randomization and protocol deviations and while this did not impact results, it is cause for concern | Not serious   | Not serious  | Not serious | Not detected     | HR 0.70 (95% CI 0.58 to 0.85) | Moderate<br><br>This outcome has one serious (-1) therefore <b>downgrade by one to moderate</b> |

CVD = cardiovascular disease; GRADE = Grading of Recommendations, Assessment, Development, and Evaluations; HR = hazard ratio; MI = myocardial infarction; RCT = randomized controlled trial; SR = systematic review

*Table 3: Summary of recommendations from major guidelines published within the past 5 years*

| Our question                                                                               | 2018 AHA <sup>1</sup>                                                                                                                                  | 2019 ESC Dyslipidemia <sup>2</sup>                                                                                                                                                                  | 2020 VA <sup>3</sup>                                                                                                                                                  | 2021 CCS <sup>4</sup>                                                                                                                         | 2021 ESC CVD Prevention <sup>5</sup>                                                                                  | 2022 USPSTF <sup>6</sup> |
|--------------------------------------------------------------------------------------------|--------------------------------------------------------------------------------------------------------------------------------------------------------|-----------------------------------------------------------------------------------------------------------------------------------------------------------------------------------------------------|-----------------------------------------------------------------------------------------------------------------------------------------------------------------------|-----------------------------------------------------------------------------------------------------------------------------------------------|-----------------------------------------------------------------------------------------------------------------------|--------------------------|
| In patients with/at risk of CVD, does the Mediterranean Diet reduce the risk of CV events? | “Use lifestyle counseling to recommend a heart healthy diet consistent with racial/ethnic preferences to avoid weight gain and address BP and lipids.” | Dietary patterns that have been more extensively evaluated are the Dietary Approaches to Stop Hypertension (DASH) diet—particularly in relation to BP control—and the Mediterranean diet; both have | “Recommend dietitian-led Mediterranean diet for risk >12%”<br>For primary and secondary prevention of CVD, we suggest a dietitian-led Mediterranean diet. - Weak for” | “We continue to recommend a Mediterranean dietary pattern, which has evidence of CV outcome benefit in systematic reviews and meta-analyses.” | “It is recommended to adopt a Mediterranean or similar diet to lower risk of CVD.”<br>Class I, Level A Recommendation | Did not address diet     |

| Our question | 2018 AHA <sup>1</sup> | 2019 ESC<br>Dyslipidemia <sup>2</sup>                                                                | 2020 VA <sup>3</sup> | 2021 CCS <sup>4</sup> | 2021 ESC CVD<br>Prevention <sup>5</sup> | 2022 USPSTF <sup>6</sup> |
|--------------|-----------------------|------------------------------------------------------------------------------------------------------|----------------------|-----------------------|-----------------------------------------|--------------------------|
|              |                       | proved to be effective in reducing CV risk factors and, possibly, to contribute to ASCVD prevention. |                      |                       |                                         |                          |

<sup>1</sup>Grundy 2018; <sup>2</sup>Mach 2020; <sup>3</sup>Management of Dyslipidemia for Cardiovascular Risk Reduction Work Group 2020; <sup>4</sup>Pearson 2021; <sup>5</sup>Visseren 2021; <sup>6</sup>US Preventive Services Task Force 2022

ASCVD = atherosclerotic cardiovascular disease; BP = blood pressure; CV = cardiovascular; CVD = cardiovascular disease

## **CHAPTER 6: STATINS IN OLDER ADULTS**

### **CLINICAL QUESTION**

In patients over age 65, do statins reduce cardiovascular events compared to placebo, without significantly increasing harms?

### **BOTTOM LINE**

Best evidence is from a large systematic review (SR) that included individualized patient data, separated by primary and secondary prevention and grouped into 5-year age categories with a median follow-up of 4.9 years. For patients 65-75 years old without cardiovascular disease (CVD) (primary prevention), statins resulted in an around 25% relative decrease in risk of major adverse cardiac events (MACE). For combined primary and secondary prevention patients, statins resulted in an around 10% decrease in cardiovascular (CV) mortality. For patients over 75 years, starting statin therapy did not significantly decrease risk of future CV events. For patients over 65 years of age (including those >75 years) with established CVD (secondary prevention), statins resulted in a 20% relative reduction in MACE.

In SRs that reported on patients >65 years of age, for secondary prevention, statins led to a relative reduction in CV mortality by 20-30% and all-cause mortality by 20%. In primary prevention, statins did not lead to a reduction in CV or all-cause mortality. Overall adverse events, adverse events resulting in medication discontinuation, and incidence of cancers were not different between statin therapy and placebo.

### **EVIDENCE**

The focus of this review is on clinically meaningful outcomes and important harms of statin therapy in adults aged 65 years or older. Seven SRs (8-28 randomized controlled trials [RCTs]; N = 18,192-186,854; follow-up 52-588 weeks) exploring statin therapy in patients aged 65 years or older, with or without CVD were included (**Afilalo 2008, CTTC 2019, Ponce 2019, Roberts 2007, Savarese 2013, Teng 2015, Zhou 2020**). While most reviews included similar RCTs, inclusion criteria, data analysis (primary, secondary, or mixed risk populations), age categories, and outcomes reported differed. Regardless of differences, results were relatively consistent among SRs. For characteristics of the included SRs, see *Table 1*. For further explanation of the SRs including AMSTAR and GRADE see *Appendix 1*, and *Tables 2 and 3*.

Focusing on the largest SR (**CTTC 2019**), including individualized patient data comparing statins to placebo in 21 RCTs and high versus low dose statins in 5 RCTs. The review limited inclusion to trials with a minimum of 1,000 participants, followed for 2 years. 186,854 patients followed for a median 4.9 years were grouped by age at randomization (5-year categories) and by primary or secondary



prevention. Of the total population, 55% had pre-existing CVD, 79% were over the age of 55 at commencement, and 8% were over the age of 75. The primary outcome of “major vascular events” (non-fatal myocardial infarction, coronary death, coronary revascularization, or stroke) was analyzed by 5-year age categories, and by primary or secondary prevention. Further, CV and overall mortality was also reported but only analyzed by age category (not by primary or secondary prevention).

***Table 1: Characteristics of included systematic reviews***

| <b>Study</b>  | <b>Trials (patients)</b> | <b>Duration</b>    | <b>% Male</b> | <b>Mean age (years)</b> | <b>Population studied/ reported</b>                      | <b>Age explored, categories</b>                  | <b>Outcomes reported</b>                                                                                                                                  | <b>Notes</b>                                              |
|---------------|--------------------------|--------------------|---------------|-------------------------|----------------------------------------------------------|--------------------------------------------------|-----------------------------------------------------------------------------------------------------------------------------------------------------------|-----------------------------------------------------------|
| Roberts 2007  | 18 (51,351)              | Range 1-6 years    | 72%           | NR                      | Primary and secondary combined (mixed)                   | ≥60 years (also reported on patients ≥65 years)  | All-cause mortality, CHD mortality, fatal and nonfatal myocardial infarction, or stroke. Adverse events (LFTs, CK), discontinuation due to adverse events |                                                           |
| Afilalo 2008  | 9 (19,569)               | Mean 4.9 years     | NR            | NR                      | Secondary                                                | ≥65 years                                        | All-cause mortality, CHD mortality, non-fatal MI, revascularization, stroke                                                                               |                                                           |
| Savarese 2013 | 8 (24,674)               | Mean 3.5 years     | 57%           | 73                      | Primary                                                  | ≥65 years                                        | All-cause death, CV death, MI, stroke, and cancer                                                                                                         |                                                           |
| Teng 2015     | 8 (25,952)               | Mean 3.5           | 56%           | 73                      | Primary                                                  | ≥65 years                                        | MACE, mortality, 3Xs LFTs, myalgia, myopathy, rhabdomyolysis, serious AEs, diabetes, cognition                                                            |                                                           |
| Ponce 2019    | 17 (50,322)              | Range 52-588 weeks | NR            | NR                      | Primary and secondary: analyzed separately               | ≥65 years                                        | CAD, CV mortality, all-cause mortality                                                                                                                    | Included non-statin trials but reported on statins alone. |
| CTTC 2019     | 28 (186,854)             | Median 4.9 years   | 72%           | 63                      | Primary and secondary (analyzed combined and separately) | <55 years; then 5-year groupings until >75 years | Major vascular events: major coronary events, coronary revascularization, and stroke. Major coronary events: non-fatal MI or coronary death.              | Analyzed with or without 4 RCTs with HF or CRF patients   |

| Study     | Trials (patients) | Duration       | % Male | Mean age (years) | Population studied/ reported | Age explored, categories | Outcomes reported                                                               | Notes      |
|-----------|-------------------|----------------|--------|------------------|------------------------------|--------------------------|---------------------------------------------------------------------------------|------------|
|           |                   |                |        |                  |                              |                          | Cancers, cause-specific mortality                                               |            |
| Zhou 2020 | 11 (18,192)       | Median 3 years | 57%    | 74               | Primary                      | ≥65 years                | Focus on muscle related symptoms, total and serious AEs, discontinuation for AE | Harms only |

AE = adverse event; CAD = coronary artery disease; CHD = coronary heart disease; CK = creatine kinase; CRF = chronic renal failure; CV = cardiovascular; HF = heart failure; LFT = liver function test; MACE = major adverse cardiovascular events; MI = myocardial infarction; NR = not reported; RCT = randomized controlled trial

### Efficacy: primary prevention

#### **MACE**

Outcomes from the largest SR are reported due to the included subgroups that analyze participants by age and CV prevention group (primary versus secondary) (**CTTC 2019**). It should be noted that overall analyses included patients under the age of 65 and results are reported per 1mmol/L of LDL reduction, which assumes a linear relationship in reduction of LDL and vascular events and may impact clinical interpretability. Another SR found that statins, on average, decrease LDL by 1.22 mmol/L, while control decreases 0.26mmol/L for an ~1mmol/L difference (**Savarese 2013**).

- Major vascular events (major coronary events [non-fatal myocardial infarction or coronary death] plus coronary revascularization and stroke) (**CTTC 2019**). MACE benefit with statins appears to diminish with advancing age in primary prevention, with uncertainty existing in those over 75 years (**CTTC 2019**). For example:
  - For patients >65 to ≤70 years: relative risk (RR) 0.61 (95% confidence interval [CI] 0.51 to 0.73)
  - For patients >70 to ≤75 years: RR 0.84 (95% CI 0.70 to 1.01)
  - For patients ≥75 years: RR 0.92 (95% CI 0.73 to 1.16)

Similarly, a smaller, earlier SR (8 RCTs; N = 25,952) found statins decreased MACE in patients ≥65 years old without CVD (RR 0.82 [95% CI 0.74 to 0.92]) (**Teng 2015**).

#### **Mortality**

- CV mortality
  - Reported by two SRs; no statistically significant reduction with statin therapy (**Ponce 2019; Savarese 2013**).

- All-cause mortality
  - Reported by three SRs; no statistically significant reduction with statin therapy (**Ponce 2019; Savarese 2013; Teng 2015**).

Efficacy: secondary prevention

**MACE**

- Major vascular events: ~20% relative significant benefit across all ages (**CTTC 2019**)
  - Including all patients: 4.4% versus 5.4% placebo (events per annum); RR 0.80 (95% CI 0.77 to 0.82) (**CTTC 2019**)
    - For example, patients >65 to ≤70 years: 4.3% statins versus 5.5% placebo (events per annum; statistically significant)
    - For patients >75 years: 6.0% statins versus 6.8% placebo (events per annum; statistically significant)

**Mortality**

- CV mortality
  - Reported by two SRs, finding a 20-30% relative reduction
    - RR 0.80 (95% CI 0.73 to 0.89) (**Ponce 2019**); RR 0.70 (95% CI 0.53 to 0.83) (**Afilalo 2008**)
- All-cause mortality
  - Reported by two SRs, finding a 20% relative reduction
    - RR 0.80 (95% CI 0.73 to 0.89) (**Ponce 2019**); RR 0.78 (95% CI 0.65 to 0.89) (**Afilalo 2008**)

Efficacy: primary + secondary prevention

**Mortality**

- Vascular death
  - Including all patients: 1.2% versus 1.4% (events per annum); RR 0.88 (95% CI 0.85 to 0.91) (**CTTC 2019**)
    - For patients >65 to ≤70: 1.4% statins versus 1.7% placebo (events per annum; statistically significant)
    - For patients >75 years: 3.7% statins versus 4.0% placebo (events per annum; not statistically significant)
  - Five SRs reporting on CV mortality found statins led to a relative reduction of 9-30%, with 4/5 results statistically significant.
- All-cause mortality
  - Including all patients: 2.2% versus 2.3% (events per annum); RR 0.91 (95% CI 0.88 to 0.93) (**CTTC 2019**)
    - For patients >65 to ≤70: 2.5% statins versus 2.8% placebo (events per annum; statistically significant)
    - For patients >75 years: 6.2% statins versus 6.6% placebo (events per annum; not statistically significant)

- Six SRs reporting on all-cause mortality found statins led to a relative reduction of 4-22%, with 4/6 results statistically significant.

### Safety

Statins in a population of adults over the age of 65 were not associated with significant harms. Overall adverse events were reported by one SR in a primary prevention population (**Zhou 2020**), finding no difference between statins and placebo (RR 0.99, 95% CI 0.95 to 1.04). Serious adverse events were reported by two SRs, finding no difference between statins and placebo. Discontinuation due to adverse events was reported by two SRs, finding no difference between statins and placebo (median RR 1.08; 0/2 SRs statistically significant).

### **Statins and cancer**

Three SRs examined the effect of statins on cancer incidence in a mixed risk population. The earliest SR (**Roberts 2007**) (based on three trials of 10,339 patients 65 years of age or older), found a borderline statistical significance increase in cancer incidence (RR 1.16, 95% CI 1.01 to 1.22). This finding was largely driven by the results of the 3-year PROSPER trial which enrolled ~5,800 older adults aged 70-82 years (mean age 75 years) with CVD and randomized to pravastatin or placebo. The 9-year follow up of the PROSPER trial did not show an increase in cancer incidence (hazard ratio [HR] 1.08, 95% CI 0.96 to 1.21) or cancer death (HR 1.12, 95% CI 0.96 to 1.30). Two subsequent and larger SRs (**CTTC 2019; Savarese 2013**) including one with individual patient data and separated by age intervals (**CTTC 2022**) did not find a difference in cancer incidence (**CTTC 2019; Savarese 2013**) or cancer death (**CTTC 2019**).

### New literature

Following the completion of our search, a new SR was published, examining a population of older adults (>80 years), without CVD (primary prevention) being treated with statin therapy (**Marcellaud 2023**). This review included both RCTs and cohort studies, however did not add any new evidence to what is currently presented.

The STAREE trial (**ClinicalTrials.gov NCT02099123**) is an ongoing RCT that will determine whether taking daily statin therapy (40 mg atorvastatin) will extend the length of a disability-free life and CV outcomes in healthy participants aged 70 years and above. Estimated completion year is 2025.

## **CONTEXT**

### Major guideline recommendations

Guidelines vary in their definition of older adults and their recommended approaches. Recommendations vary from no specific recommendations, to insufficient evidence to make recommendations, to treating patients (including those >75 years) like younger patients. For a list of recommendations from recent guidelines, refer to *Table 4*.

## REFERENCES

- Afilalo J, Duque G, Steele R, Jukema JW, de Craen AJ, Eisenberg MJ. Statins for secondary prevention in elderly patients: a hierarchical bayesian meta-analysis. *J Am Coll Cardiol*. 2008;51(1):37–45.
- Cholesterol Treatment Trialists' Collaboration. Efficacy and safety of statin therapy in older people: a meta-analysis of individual participant data from 28 randomized controlled trials. *Lancet*. 2019;393(10170):407-15.
- ClinicalTrials.gov [Internet]. Bethesda (MD): National Library of Medicine (US); 2000 - . A Clinical Trial of STAtin Therapy for Reducing Events in the Elderly (STAREE); 2014 Mar 28 [cited 2023 Mar 25]; [about 3 p.]. Available from: <https://classic.clinicaltrials.gov/ct2/show/NCT02099123?cond=STAREE&draw=2&rank=1>. Identifier NCT02099123.
- Grundy SM, Stone NJ, Bailey AL, et al. 2018 AHA/ACC/AACVPR/AAPA/ABC/ACPM/ADA/AGS/APhA/ASPC/NLA/PCNA guideline on the management of blood cholesterol: a report of the American College of Cardiology/American Heart Association Task Force on Clinical Practice Guidelines. *Circulation*. 2019;139:e1082-e1143. doi: 10.1161/CIR.0000000000000625
- Heart Protection Study Collaborative Group. MRC/BHF Heart Protection Study of cholesterol lowering with simvastatin in 20 536 high-risk individuals: a randomised placebo-controlled trial. *Lancet* 2002; 360: 7-22.
- Mach F, Baigent C, Catapano AL, Koskinas KC, Casula M, Badimon L et al. 2019 ESC/EAS Guidelines for the management of dyslipidaemias: lipid modification to reduce cardiovascular risk. *Eur Heart J*. 2020;41(1):111-188. doi: 10.1093/eurheartj/ehz455.
- The Management of Dyslipidemia for Cardiovascular Risk Reduction Work Group. VA/DoD clinical practice guideline for the management of dyslipidemia for cardiovascular risk reduction. US Department of Veterans Affairs, Department of Defense. 2020. 127 p.
- Marcellaud E, Jost J, Tchalla A, Magne J, Aboyans V. Statins in primary prevention in people over 80 years. *Am J Cardiol*. 2023;187:62-73. doi:10.1016/j.amjcard.2022.10.015
- Pearson GJ, Thanassoulis G, Anderson TJ, et al. 2021 Canadian Cardiovascular Society guidelines for the management of dyslipidemia for the prevention of cardiovascular disease in adults. *Can J Cardiol*. 2021;37:1129-1150.
- Ponce OJ, Larrea-Mantilla L, Hemmingsen B, Serrano V, Rodriguez-Gutierrez R, Spencer-Bonilla G, et al. Lipid-lowering agents in older individuals: a systematic review and meta-analysis of randomized clinical trials. *J Clin Endocrinol Metab*. 2019 May 1;104(5):1585-94.

- Roberts CG, Guallar E, Rodriguez A. Efficacy and safety of statin monotherapy in older adults: a meta-analysis. *J Gerontol A Biol Sci Med Sci*. 2007;62(8):879-87.
- Savarese G, Gotto AM Jr, Paolillo S, D'Amore C, Losco T, Musella F, Scala O, Marciano C, Ruggiero D, Marsico F, De Luca G, Trimarco B, Perrone-Filardi P. Benefits of statins in elderly subjects without established cardiovascular disease: a meta-analysis [published correction appears in *J Am Coll Cardiol*. 2014;63(11):1122]. *J Am Coll Cardiol*. 2013;62(22):2090–2099.
- Teng M, Lin L, Zhao YJ, Khoo AL, Davis BR, Yong QW, et al. Statins for primary prevention of cardiovascular disease in elderly patients: systematic review and meta-analysis. *Drugs Aging*. 2015;32(8):649-61.
- US Preventive Services Task Force. Statin use for the primary prevention of cardiovascular disease in adults US Preventive Services Task Force recommendation statement. *JAMA*. 2022;328(8):746-753. doi:10.1001/jama.2022.13044
- Visseren FL, Mach F, Smulders YM, Carballo D, Koskinas KC, Bäck M et al. ESC Guidelines on cardiovascular disease prevention in clinical practice: Developed by the Task Force for cardiovascular disease prevention in clinical practice with representatives of the European Society of Cardiology and 12 medical societies With the special contribution of the European Association of Preventive Cardiology (EAPC). *Eur Heart J*. 2021;42(34):3227-337.
- Zhou Z, Albarqouni L, Curtis AJ, Breslin M, Nelson M. The safety and tolerability of statin therapy in primary prevention in older adults: a systematic review and meta-analysis. *Drugs Aging*. 2020;37(3):175-85.

## METHODS

Searches were conducted on December 1, 2022. In total, 380 SRs were identified through database searching and reviewed by two authors for inclusion. Seven SRs were included in this review.

- PubMed search: our search strategy included multiple searches. Based on previous guidelines and our broad knowledge of this topic, we chose to limit our searches to SRs. No limit was placed on year or language, to prevent missing any relevant reviews
  - (old\* OR senior\*) AND (cardiovascular) AND (statin\*); Systematic Review Filter. Results = 16
    - Through this initial search, we did not identify any relevant SRs, therefore we broadened our search terms to include synonyms for both intervention and outcome. Based on this adjustment, the following search was conducted
  - (older adult\* OR elderly) AND (statin\* OR lipid\*) AND (mortality OR cardiovascular) Filters: Systematic Review. Results = 364
    - This search yielded nine potentially relevant SRs, of which three were included in this review (**Teng 2015, Ponce 2019, Zhou 2020**)

- Reference list search: after inclusion, a reference list search was conducted on the three SRs. From this, three SRs were further identified (**Afilalo 2008, Savarese 2013, CTTC 2019**)
- Guideline reference search: we searched through relevant guidelines and identified one additional SR (**Roberts 2007**)

## APPENDIX 1: INDIVIDUAL SYSTEMATIC REVIEWS

### Roberts 2007

- This SR included 18 trials of 51,351 patients with an average age of greater than 60, followed for at least 1 year. While this review included a mixed population of CV prevention, the majority focused on a population at high risk for coronary heart disease (two in primary prevention). The search protocol for this review was narrow, searching only PubMed database. Further, this review is limited by their inclusion criteria of an average age of over 60. This means that participants under the age of 60 were likely included in this review.
- Outcomes were reported based on two groups: the overall population of the SR and a subgroup of participants  $\geq 65$  years.
- Borderline statistical significance was found in cancer incidence (RR 1.16, 95% CI 1.01 to 1.22) based on three trials of 10,339 patients 65 years of age or older.

### Afilalo 2008

- This SR of secondary prevention patients included 9 trials of 19,569 patients followed for a mean 4.9 years. The authors included data from both unpublished (5/9) and published sources (4/9). One trial published in 2002 (**Heart Protection Study Group 2002**) contributed over 50% of the data, in 10,697 patients with vascular disease or diabetes. Analyses were conducted with and without this study, finding consistency in review outcomes.
- Further study details are provided below:

| Author/year | Follow-up duration | Number of patients | % Male | Baseline LDL | Age range                           | Intervention        |
|-------------|--------------------|--------------------|--------|--------------|-------------------------------------|---------------------|
| HPSG 2002   | 5.0 years          | 10,697             | 75     | 3.4 mmol/L   | 65-80<br>(mean/median not reported) | Simvastatin 40 mg/d |

HPSG = Heart Protection Study Group; LDL = low-density lipoprotein

### Savarese 2013

- This SR included 8 primary prevention trials of 24,674 patients followed for a mean 3.5 years. All included participants were  $\geq 65$  years. The authors of this review completed GRADE assessments, concluding that all reported outcomes were based on high certainty evidence.

#### Teng 2015

- This SR included 8 primary prevention trials of 25,952 patients followed for a mean 3.5 years. All included participants were  $\geq 65$  years. Trials were included only if they reported on at least one clinically meaningful outcome (e.g., MACE, all-cause mortality). Adverse events were reported, however there was insufficient data to conduct meta-analyses for myopathy, rhabdomyolysis and cognitive impairment.

#### Ponce 2019

- This SR included 17 trials in 50,322 patients, aged 65 and older, followed for a minimum of one year. Follow up in primary prevention trials ranged from 52-416 weeks and from 120-588 weeks in secondary prevention.
- A subgroup analysis was conducted, based on one primary prevention trial in 1,129 patients with diabetes. Reduction in myocardial infarction was significant (RR 0.41, 95% CI 0.22 to 0.77).
- Coronary artery disease, CV and all-cause mortality, and stroke were not statistically significant.
- In primary prevention, two cohorts of patients were formed:  $\geq 65-75$  and  $>75$  years of age. No statistical between group differences were found for any outcome. Based on data reporting, a cohort of patients  $>75$  years of age could not be formed for secondary prevention trials.

#### CTTC 2019

- This updated meta-analysis included 28 trials in 186,854 patients with individual patient data, followed for a median 4.9 years. To be included, trials had to include at least one intervention to lower LDL cholesterol and including at least 1,000 patients followed for a minimum of two years. Twenty three of the 28 included trials compared statin therapy to placebo, while the rest included high vs lower dose statins. The included population had a 56% history of vascular disease.
- In most cases when power was sufficient, outcomes were analyzed based on six age groups:  $\leq 55$  years, 56-60 years, 61-65 years, 66-70 years, 71-75 years,  $>75$  years. When power was low, outcomes were split into two categories:  $\leq 75$  years or  $>75$  years. Further, four trials including patients with heart failure or on dialysis were included or excluded with sensitivity analyses being performed to determine the effect of this population on the intended outcome.
- Limitations of this SR included that the results were reported per 1mmol/L reduction in LDL and not overall for each category and that they did not publish all-cause mortality or CV mortality separated by primary or secondary prevention.



### Zhou 2020

- This SR included 11 primary prevention trials in 18,192 patients, aged 65 and older, followed for a median of 3 years. This trial did not report on efficacy outcomes, however looked specifically at the harms of statin therapy in this population.
- All included trials were industry funded.
- GRADE was completed for all outcomes, concluding that most outcomes were based on moderate certainty evidence. Three outcomes (myopathy, rhabdomyolysis, and total permanent discontinuations) were based on low certainty evidence.

### **APPENDIX 2: TABLES**

Table 2: Quality assessment of included systematic reviews using AMSTAR

| Study         | Duplicate study selection and data extraction | Comprehensive literature search performed | Characteristics of included studies | Scientific quality of included studies assessed | Methods to combine findings appropriate | Conflict of interest stated | Publication bias formally assessed |
|---------------|-----------------------------------------------|-------------------------------------------|-------------------------------------|-------------------------------------------------|-----------------------------------------|-----------------------------|------------------------------------|
| Afilalo 2008  | Yes                                           | Yes                                       | Yes                                 | Yes                                             | Yes                                     | Yes                         | No                                 |
| CTTC 2019     | No                                            | Yes                                       | Yes                                 | No                                              | Yes                                     | Yes                         | No                                 |
| Ponce 2019    | Yes                                           | Yes                                       | Yes                                 | Yes                                             | Yes                                     | Yes                         | No                                 |
| Roberts 2007  | Yes                                           | No                                        | Yes                                 | No                                              | Yes                                     | Yes                         | No                                 |
| Savarese 2013 | Yes                                           | Yes                                       | Yes                                 | Yes                                             | No                                      | Yes                         | Yes                                |
| Teng 2015     | Yes                                           | No                                        | Yes                                 | Yes                                             | Yes                                     | Yes                         | No                                 |
| Zhou 2020     | Yes                                           | Yes                                       | Yes                                 | Yes                                             | Yes                                     | Yes                         | Yes                                |

AMSTAR = Assessment of Multiple Systematic Reviews

Table 3A: GRADE certainty of evidence for the effect of statin therapy on MACE in primary prevention in those aged 65-75 and in secondary prevention

**Treatment:** statins (secondary prevention; primary prevention in patients aged 65-75)

**Outcome:** MACE

| Study design | No. studies (no. patients) | Risk of bias | Inconsistency | Imprecision | Indirectness | Publication bias | Effect estimate (range) | Median (IQR) | Overall rating                             |
|--------------|----------------------------|--------------|---------------|-------------|--------------|------------------|-------------------------|--------------|--------------------------------------------|
| SR of RCTs   | 2 (18,914-141,365)         | Not serious  | Not serious   | Not serious | Not serious  | Undetected       | RR 0.74-0.82            | RR 0.78      | High<br><br>This outcome has no downgrades |

GRADE = Grading of Recommendations, Assessment, Development, and Evaluations; IQR = inter-quartile range; MACE = major adverse cardiovascular events; RR = risk ratio; SR = systematic review

*Table 3B: GRADE certainty of evidence for the effect of statin therapy on MACE in primary prevention in those aged ≥75*

**Treatment:** statins (primary prevention in patients aged ≥75)

**Outcome:** MACE

| Study design | No. studies (no. patients) | Risk of bias | Inconsistency | Imprecision                                                     | Indirectness | Publication bias | Effect estimate               | Median (IQR) | Overall rating                                                                                  |
|--------------|----------------------------|--------------|---------------|-----------------------------------------------------------------|--------------|------------------|-------------------------------|--------------|-------------------------------------------------------------------------------------------------|
| SR of RCTs   | 1 (21,926)                 | Not serious  | Not serious   | Serious<br><br>CIs contain important benefit and potential harm | Not serious  | Undetected       | RR 0.92 (95% CI 0.73 to 1.16) | NA           | Moderate<br><br>This outcome has one serious (-1) therefore <b>downgrade by one to moderate</b> |

CI = confidence interval; GRADE = Grading of Recommendations, Assessment, Development, and Evaluations; IQR = inter-quartile range; MACE = major adverse cardiovascular events; NA = not applicable; RR = risk ratio; SR = systematic review

*Table 4: Summary of recommendations from major guidelines published within the past 5 years*

| Our question                                                                                                                         | 2018 AHA <sup>1</sup>                                                                                                                                                                                                                                                                                                                                                                                                                                                                                                                                                                                                                                                                                                                                                                        | 2019 ESC Dyslipidemia <sup>2</sup>                                                                                                                                                                                                                                                                                                                                                                                                                                                   | 2020 VA <sup>3</sup>                                 | 2021 CCS <sup>4</sup>                                | 2021 ESC CVD Prevention <sup>5</sup>                                                                                                                                                                                                                                                                                                                                                                                                                               | 2022 USPSTF <sup>6</sup>                                                                                                                                                                                                      |
|--------------------------------------------------------------------------------------------------------------------------------------|----------------------------------------------------------------------------------------------------------------------------------------------------------------------------------------------------------------------------------------------------------------------------------------------------------------------------------------------------------------------------------------------------------------------------------------------------------------------------------------------------------------------------------------------------------------------------------------------------------------------------------------------------------------------------------------------------------------------------------------------------------------------------------------------|--------------------------------------------------------------------------------------------------------------------------------------------------------------------------------------------------------------------------------------------------------------------------------------------------------------------------------------------------------------------------------------------------------------------------------------------------------------------------------------|------------------------------------------------------|------------------------------------------------------|--------------------------------------------------------------------------------------------------------------------------------------------------------------------------------------------------------------------------------------------------------------------------------------------------------------------------------------------------------------------------------------------------------------------------------------------------------------------|-------------------------------------------------------------------------------------------------------------------------------------------------------------------------------------------------------------------------------|
| <p>In patients over age 65, do statins reduce cardiovascular events compared to placebo, without significantly increasing harms?</p> | <p>In patients older than 75 years of age with clinical ASCVD, it is reasonable to initiate moderate- or high-intensity statin therapy after evaluation of the potential for ASCVD risk reduction, adverse effects, and drug–drug interactions, as well as patient frailty and patient preferences.</p> <p>“In patients older than 75 years of age who are tolerating high-intensity statin therapy, it is reasonable to continue high intensity statin therapy after evaluation of the potential for ASCVD risk reduction, adverse effects, and drug–drug interactions, as well as patient frailty and patient preferences”</p> <p>“In adults 40 to 75 years of age with diabetes mellitus, regardless of estimated 10-year ASCVD risk, moderate-intensity statin therapy is indicated”</p> | <p>“Treatment with statins is recommended for older people with ASCVD in the same way as for younger patients”</p> <p>“Treatment with statins is recommended for primary prevention, according to the level of risk, in older people aged ≤75 years”</p> <p>“Initiation of statin treatment for primary prevention in older people aged &gt;75 years may be considered, if at high-risk or above”</p> <p>“It is recommended that the statin is started at a low dose if there is</p> | <p>No specific recommendations for older adults.</p> | <p>No specific recommendations for older adults.</p> | <p>Define older adults as those aged ≥70 years.</p> <p>“Treatment with statins is recommended for older people with ASCVD in the same way as for younger patients”</p> <p>“Initiation of statin treatment for primary prevention in older people aged ≥70 may be considered, if at high risk or above”</p> <p>“It is recommended that the statin is started at a low dose if there is significant renal impairment and/or the potential for drug interactions”</p> | <p>“The USPSTF concludes that the current evidence is insufficient to assess the balance of benefits and harms of initiating a statin for the primary prevention of CVD events and mortality in adults 75 years or older”</p> |

| Our question | 2018 AHA <sup>1</sup>                                                                                                                                                                                                                                                                                                                                                                                                                                                                                                                                                                                                                                                                                                                                                                                          | 2019 ESC<br>Dyslipidemia <sup>2</sup>                                                                                                       | 2020 VA <sup>3</sup> | 2021 CCS <sup>4</sup> | 2021 ESC CVD<br>Prevention <sup>5</sup> | 2022 USPSTF <sup>6</sup> |
|--------------|----------------------------------------------------------------------------------------------------------------------------------------------------------------------------------------------------------------------------------------------------------------------------------------------------------------------------------------------------------------------------------------------------------------------------------------------------------------------------------------------------------------------------------------------------------------------------------------------------------------------------------------------------------------------------------------------------------------------------------------------------------------------------------------------------------------|---------------------------------------------------------------------------------------------------------------------------------------------|----------------------|-----------------------|-----------------------------------------|--------------------------|
|              | <p>“In adults older than 75 years of age with diabetes mellitus and who are already on statin therapy, it is reasonable to continue statin therapy”</p> <p>“In adults 75 years of age or older with an LDL-C level of 70 to 189 mg/dL (1.7 to 4.8 mmol/L), initiating a moderate intensity statin may be reasonable”</p> <p>“In adults 75 years of age or older, it may be reasonable to stop statin therapy when functional decline (physical or cognitive), multimorbidity, frailty, or reduced life-expectancy limits the potential benefits of statin therapy”</p> <p>“In adults 76 to 80 years of age with an LDL-C level of 70 to 189 mg/dL (1.7 to 4.8 mmol/L), it may be reasonable to measure coronary artery calcium (CAC) to reclassify those with a CAC score of zero to avoid statin therapy”</p> | <p>significant renal impairment and/or the potential for drug interactions, and then titrated upwards to achieve LDL-C treatment goals”</p> |                      |                       |                                         |                          |

<sup>1</sup>Grundy 2018; <sup>2</sup>Mach 2020; <sup>3</sup>Management of Dyslipidemia for Cardiovascular Risk Reduction Work Group 2020; <sup>4</sup>Pearson 2021; <sup>5</sup>Visseren 2021; <sup>6</sup>US Preventive Services Task Force 2022

ASCVD = atherosclerotic cardiovascular disease; CAC = coronary artery calcium; CVD = cardiovascular disease; LDL-C = low-density lipoprotein-cholesterol

## **CHAPTER 7: STATINS AND COGNITION**

### **CLINICAL QUESTION**

In patients on statin therapy, do statins negatively affect cognition, memory, cognitive decline, or dementia compared to no statin?

### **BOTTOM LINE**

Based on randomized controlled trials (RCTs) and large long term observational studies, statins are not associated with an increased risk of dementia or worsening of cognition scores.

### **EVIDENCE**

We found a total of seven systematic reviews (SRs) with meta-analysis comparing statin with placebo or no statin. Three SRs included 2-9 RCTs (N = 1,046-26,340) (**McGuinness 2016, Davis 2020, Xuan 2020**) and four SRs included 25-46 observational studies (N = 123-9,162,509) (**Chu 2018, Zhang 2018, Poly 2020, Olmastroni 2022**). *Table 1* and *Table 2* summarize SR characteristics and results. *Tables 3A-C* include the quality assessment of included SRs. GRADE certainty of evidence evaluation can be found in *Table 4*.

#### *Incidence of dementia*

- SRs of RCTs
  - One SR (one RCT; N = 20,536; 65-80 years old) reported on the incidence of dementia (**McGuinness 2016**)
    - **Heart Protection Study Collaborative Group (2002)**: 20,536 patients with cardiovascular disease or diabetes randomized to simvastatin or placebo for 5 years. Incidence of dementia was a secondary outcome and diagnostic criteria was not described.
    - Incidence of dementia: 0.3% in each group, no difference over 5 years
- RCTs not included in above SRs
  - **Bosch 2019**: N = 2,361; mean age 74
    - 2x2 factorial design comparing candesartan/hydrochlorothiazide, rosuvastatin, or both versus placebo
    - Cognitive outcomes (example, scores on Digital Symbol Substitution Test, 12-item Montreal Cognitive Assessment test [MOCA], Trail Making Test Part 2) and functional outcomes (example Standard Assessment of Global Activities in the Elderly):
      - No statistical differences at 5.7 years
    - Number of patients who developed dementia or were institutionalized
      - 12 (rosuvastatin) versus 8 (placebo), not statistically different
  - **Hu 2020**: N = 1,244; mean age 70; baseline mini-mental state exam (MMSE) score = 29
    - 2x2 design comparing telmisartan, rosuvastatin or both versus placebo
    - Cognitive outcomes (e.g., scores on MMSE, MOCA, Mattis Dementia Rating Scale, Clinical Dementia Rating) followed annually for 7 years

- Risk of dementia: rosuvastatin lower than control group (no event rates provided),  $p < 0.001$
- Change in MMSE score: -1.9 rosuvastatin versus -2.6 control, difference  $\sim 0.8$  over 7 years (extrapolation by PEER, no comparative statistics reported)
- **Zhang 2019**: N = 732; mean age 70; baseline MMSE score = 26
  - 2x2 factorial design comparing telmisartan, rosuvastatin, or placebo
  - Incidence of cognitive impairment: 11% rosuvastatin versus 19% placebo, number needed to treat 12 over 5 years
- SRs of observational studies
  - These SRs show reduced risk of dementia, Alzheimer’s disease, and mild cognitive impairment with statins compared to no statin exposure. Risk of vascular dementia was no different between groups.
  - Details in table below

| Outcome                   | No. SRs | Median (IQR)                               | Notes                                                                                                |
|---------------------------|---------|--------------------------------------------|------------------------------------------------------------------------------------------------------|
| Dementia                  | 4       | RR 0.85 (0.83-0.85) <sup>1,2,3</sup>       | One SR <sup>4</sup> reported odds ratio 0.80<br>4/4 SRs statistically significant <sup>1,2,3,4</sup> |
| Alzheimer’s disease       | 4       | RR 0.72 (0.69-0.81) <sup>1,2,3</sup>       | One SR <sup>4</sup> reported odds ratio 0.68<br>4/4 SRs statistically significant <sup>1,2,3,4</sup> |
| Vascular dementia         | 2       | RR 0.97 <sup>1,3</sup>                     | 0/2 SR statistically significant                                                                     |
| Mild cognitive impairment | 1       | RR 0.74 (95% CI 0.56 to 0.98) <sup>1</sup> | 6 studies; N = 6,808                                                                                 |

<sup>1</sup>Chu 2018; <sup>2</sup>Zhang 2018; <sup>3</sup>Poly 2020; <sup>4</sup>Olmastroni 2022

CI = confidence interval; IQR = interquartile range; RR = risk ratio; SR = systematic review

Performance on cognitive function testing

- One SR (**McGuinness 2016**) of two RCTs (**Heart Protection Study Collaborative Group 2002; Trompet 2010**): each RCT measured cognition using different questionnaires or tools
  - MMSE: 30-point test; lower score = worse cognition
    - Mean difference 0.06 (95% CI -0.04 to 0.16) at 3.5 years (N = 5,804)
      - Minimally clinically important difference is two points (**McGuinness 2016**)
  - Telephone interview for cognitive status questionnaire: 39-point score; scores <22 considered cognitively impaired
    - Percentage of patients classified as cognitively impaired was 24% in both groups, no difference at 5 years (N = 20,536)
  - Stroop word score: total seconds to complete
    - Mean difference 0.8 seconds (95% CI -0.4 to 2.0) at 3.5 years (N = 5,804)

Statins for treatment of existing Alzheimer’s Disease

- **Xuan 2020**: one SR (9 RCTs; N = 1,489; mean age range 65-78 years) over 12-78 weeks comparing statins versus placebo
  - MMSE, ADAS-Cog, ADL: no difference
  - Neuropsychiatric Inventory Scale: one-point improvement over placebo on 36-point scale (statistically significant but not clinically meaningful)

#### Adverse events

- Two SRs (2 studies each; N = 1,045-26,340), comparing statins to placebo in patients with (**Davis 2020**) or without (**McGuinness 2016**) baseline dementia
  - Overall adverse effects, discontinuation due to adverse effects: no difference

#### Limitations

- Most RCTs evaluating the effect of statins on cognition are secondary analyses of larger cardiovascular (CV) trials (e.g., **McGuinness 2016; Bosch 2019; Hu 2020**)
- Measures used to diagnose cognitive decline/dementia varied among trials
  - Diagnostic criteria for Alzheimer's or vascular dementia not described in SRs (**Chu 2018; Zhang 2018; Zhu 2018; Poly 2020; Olmastroni 2022**) and largest RCT (**McGuinness 2016**)
  - Many cognitive tests used in RCTs are not used in clinical practice (e.g., telephone interview, Stroop-Colour-Word test)
- Low event rates (0.3%) reported in the largest RCT (**Heart Protection Study Collaborative Group 2002**)
- Results of observational studies are less reliable due to biases (e.g., 'healthy user effect' with lower risk patients more likely to use statins)
- One SR (**Zhu 2018**) had significant methodological flaws for multiple outcomes and is excluded from this summary
- One Cochrane review (**McGuinness 2016b**) searched for RCTs evaluating the effects of withdrawal or continuation of statins in people with dementia on cognitive outcomes; no RCTs were identified

#### **CONTEXT**

It is widely recognized that as people age, the risk of CV events increases and many patients will be prescribed statins. The subsequent use of statins may coincide with age-related cognitive changes.

Findings of the current review are consistent with the PEER's *Tools for Practice* article published in 2014 which states that statins do not prevent, treat, or cause cognitive impairment (**Gracias 2014**).

The STAREE trial is an ongoing community based RCT examining the effects of statins on markers of aging, including dementia. Anticipated completion is in 2025 (**US National Library of Medicine 2014**).

#### Major guideline recommendations



Recent international guidelines suggest evidence shows statins have no effects on cognition or have inconclusive effects. See Appendix *Table 5* for a summary of guideline statements.

## REFERENCES

- Bosch J, O'Donnell M, Swaminathan B, Lonn EM, Sharma M, Dagenais G. Effects of blood pressure and lipid lowering on cognition: results from the HOPE-3 study. *Neurology* 2019;92:e1435-e1446.
- Chu CS, Tseng PT, Stubbs B, Chen TY, Tang CH, Li DJ, et al. Use of statins and the risk of dementia and mild cognitive impairment: a systematic review and meta-analysis. *Sci Rep.* 2018;8:5804:1-12.
- Davis K, Bishara D, Perea G et al. Benefits and harms of statins in people with dementia: a systematic review and meta-analysis. *JAGS.* 2020;68:650-658.
- Gracias G, Allan GM, Garrison S. *Tools for Practice #115.* Accessed December 8, 2022 from [https://gomainpro.ca/wp-content/uploads/tools-for-practice/1403198659\\_20140609\\_082630.pdf](https://gomainpro.ca/wp-content/uploads/tools-for-practice/1403198659_20140609_082630.pdf).
- Grundy SM, Stone NJ, Bailey AL, et al. 2018 AHA/ACC/AACVPR/AAPA/ABC/ACPM/ADA/AGS/APhA/ASPC/NLA/PCNA guideline on the management of blood cholesterol: a report of the American College of Cardiology/American Heart Association Task Force on Clinical Practice Guidelines. *Circulation.* 2019;139:e1082-e1143. doi: 10.1161/CIR.0000000000000625
- Heart Protection Study Collaborative Group. MRC/BHF Heart Protection Study of cholesterol lowering with simvastatin in 20536 high-risk individuals: a randomised placebo-controlled trial. *Lancet.* 2002;360:7-22.
- Hu WJ, Li Y, Zhao YX, Dong YL, Cui Y, Sun SW. Telmisartan and rosuvastatin synergistically ameliorate dementia and cognitive impairment in older hypertensive patients with apolipoprotein E genotype. *Front Aging Neurosci.* 2020;12:1-13.
- Mach F, Baigent C, Catapano AL, Koskinas KC, Casula M, Badimon L et al. 2019 ESC/EAS Guidelines for the management of dyslipidaemias: lipid modification to reduce cardiovascular risk. *Eur Heart J.* 2020;41(1):111-188. doi: 10.1093/eurheartj/ehz455.
- The Management of Dyslipidemia for Cardiovascular Risk Reduction Work Group. VA/DoD clinical practice guideline for the management of dyslipidemia for cardiovascular risk reduction. US Department of Veterans Affairs, Department of Defense. 2020. 127 p.
- McGuinness B, Craig D, Bullock R, Passmore P. Statins for the prevention of dementia. *Cochrane Database of Syst Rev.* 2016;1:Art. No.: CD003160.
- McGuinness B, Cardwell Cr, Passmore P. Statin withdrawal in people with dementia. *Cochrane Database of Syst Rev.* 2016;9:Art., No.: CD012050. (B)
- Olmastroni E, Molari G, De Beni N, Colpani O, Galimberti F, Gazzotti M. Statin use and risk of dementia or Alzheimer's disease: a systematic review and meta-analysis of observational studies. *Eur J Preventive Cardiol.* 2022;29:804-814.
- Pearson GJ, Thanassoulis G, Anderson TJ, et al. 2021 Canadian Cardiovascular Society guidelines for the management of dyslipidemia for the prevention of cardiovascular disease in adults. *Can J Cardiol.* 2021;37:1129-1150.

- Poly TN, Islam MM, Walther BA, Yang HC, Wu CC, Lin MC, et al. Association between use of statin and risk of dementia: a meta-analysis of observational studies. *Neuroepidemiology*. 2020;54:214-226.
- Trompet S, van Vilet P, de Craen AJ, Jolles J, Buckley BM, Murphy MB, et al. Pravastatin and cognitive functioning the elderly. Results of the PROSPER study. *J Neurol*. 2010;257(1);85-90.
- US National Library of Medicine. Accessed December 8, 2022 from <https://clinicaltrials.gov/ct2/show/NCT02099123>.
- US Preventive Services Task Force. Statin use for the primary prevention of cardiovascular disease in adults US Preventive Services Task Force recommendation statement. *JAMA*. 2022;328(8):746-753. doi:10.1001/jama.2022.13044
- Visseren FL, Mach F, Smulders YM, Carballo D, Koskinas KC, Bäck M et al. ESC Guidelines on cardiovascular disease prevention in clinical practice: Developed by the Task Force for cardiovascular disease prevention in clinical practice with representatives of the European Society of Cardiology and 12 medical societies With the special contribution of the European Association of Preventive Cardiology (EAPC). *Eur Heart J*. 2021;42(34):3227-337.
- Xuan K, Zhao TM, Qu GB, Liu HX, Chen X, Sun YH. The efficacy of statins in the treatment of Alzheimer’s disease: a meta-analysis of randomized controlled trial. *Neurol Sci*. 2020;41:1391-1404.
- Zhang XY, Wen JZ, Zhang ZQ. Statins use and risk of dementia. *Medicine*. 2018;97:30(e11304):1-7.
- Zhang H, Cui Y, Zhao YX, Dong YL, Duan DD, Wang J, et al. Effects of sartans and low-dose statins on cerebral white matter hyperintensities and cognitive function in older patients with hypertension: a randomized, double-blind and placebo-controlled clinical trial. *Hypertens Res*. 2019;42:717-729.
- Zhu XC, Dai WZ, Ma T. Overview the effect of statin therapy on dementia risk, cognitive changes and its pathologic change: a systematic review and meta-analysis. *Ann Transl Med*. 2018;6(22);435.

## METHODS

- Guideline search
  - Reviewed six guidelines (Grundy 2018, Mach 2020, Management of Dyslipidemia for Cardiovascular Risk Reduction Work Group 2020, Pearson 2021, US Preventive Services Task Force 2022, Visseren 2021) and extracted references relevant to clinical question.
- Pubmed searches
  - **October 6, 2022:** used search terms “statin,” “HMG Co A reductase inhibitor\*,” “cognition,” “memory,” “dementia,” “cognitive”; filtered by meta-analysis, systematic review, 2017-2022; yielded 93 results;
  - **November 10, 2022:** used search terms “statins” “cognition” “dementia” “memory loss” filtered by systematic review, 2017-2022: yielded 26 results;

- **December 6, 2022:** used search terms “statins” “cognition” “dementia” “memory loss” filtered by randomized controlled trial, 2017-2022; 5 potential articles reviewed; one met inclusion criteria and was added (Zhang 2019)
- Google Scholar advanced search
  - **November 30, 2022:** used search terms “statins,” “cognition,” “memory,” “dementia,” “cognitive”, limited to 2017-2022 (reviewed first 5 pages)- no new papers identified
- Cochrane Database search
  - **December 6, 2022:** used search terms “statin,” “cognition,” “memory,” “dementia,” “cognitive”: 6 results; no new papers identified
  - Included most recent Cochrane review (McGuinness 2016)
- Reference list searches
  - Two additional RCTs identified from discussion section of Olmastroni (Bosch et al, Hu et al)
- Similar article search
  - Hu and Bosch; 93 results retrieved; none relevant
- Median and interquartile calculations by PEER

## APPENDIX

*Table 1: Summary of characteristics of systematic reviews and randomized controlled trials*

| Study                                                     | No. studies | No. patients  | Population                        | Follow-up duration | Mean age (years) | Intervention/comparator       | Other notes                                                                                                                   |
|-----------------------------------------------------------|-------------|---------------|-----------------------------------|--------------------|------------------|-------------------------------|-------------------------------------------------------------------------------------------------------------------------------|
| <b>Systematic reviews of observational studies</b>        |             |               |                                   |                    |                  |                               |                                                                                                                               |
| Chu 2018                                                  | 25          | 110-2,004,692 | Cognitive dysfunction at baseline | 7 years            | Range 45.8-78.6  | Statin vs no statin           | Random effects, reported RR                                                                                                   |
| Olmastroni 2021                                           | 46          | 123-2,004,692 | Baseline status not indicated     | NR                 | Range 45.8-80.4  | Statin vs no statin           | Random effects, reported OR                                                                                                   |
| Poly 2020                                                 | 30          | 9,162,509     | 84,101 (~1%) had dementia         | 1-18 years         | Range 45.8-78.6  | Statin vs no statin           | Random effects, reported RR                                                                                                   |
| Zhang 2018                                                | 31          | 3,332,706     | Not described in paper            | NR                 | NR               | Statin vs no statin           | Unclear if fixed/random effects; reported RR; reporting quality was poor (e.g., limited inclusion criteria or methods stated) |
| <b>Systematic reviews of randomized controlled trials</b> |             |               |                                   |                    |                  |                               |                                                                                                                               |
| McGuinness 2016                                           | 2           | 26,340        | High risk (PMH CAD, DM, HTN)      | 42-60 months       | NR               | Statin vs placebo             | One RCT reported incidence of dementia; both RCTs reported other cognitive measures as secondary outcomes                     |
| Davis 2020                                                | 2           | 1,046         | Patients with dementia            | 72 weeks           | Range 73-75      | Statin vs placebo             | Assessing adverse effects                                                                                                     |
| Xuan 2020                                                 | 9           | 1,489         | Patients with Alzheimer's disease | 12 weeks-18 months | Range 64.5-78.2  | Statin vs placebo, other meds | Evaluated the effect of statins for the treatment of Alzheimer's disease                                                      |
| <b>Randomized controlled trials</b>                       |             |               |                                   |                    |                  |                               |                                                                                                                               |
| Zhang 2019                                                | NA          | 732           | Patients with HTN                 | 5 years            | 70 years         | Rosuvastatin vs placebo       | 2x2 factorial design with telmisartan                                                                                         |
| Bosch 2019                                                | NA          | 2,361         | No known CV disease               | 5.7 years          | 74 years         | Rosuvastatin vs placebo       | 2x2 factorial design with candesartan/HCTZ                                                                                    |
| Hu 2020                                                   | NA          | 1,244         | Patients with HTN                 | 7 years            | 70 years         | Rosuvastatin vs placebo       | 2x2 factorial design with telmisartan                                                                                         |

CAD = coronary artery disease; CV = cardiovascular; DM = diabetes mellitus; HCTZ = hydrochlorothiazide; HTN = hypertension; NA = not applicable; NR = not reported; OR = odds ratio; PMH = past medical history; RCT = randomized controlled trial; RR = risk ratio

**Table 2: Summary of systematic review results for statin effects on dementia outcomes**

| Study                                      | Outcome            | No. studies | Effect estimate | 95% CI         | SS or NSS? | No. patients | Quality of SR* | Notes for indirectness | Publication bias | Other notes                            |
|--------------------------------------------|--------------------|-------------|-----------------|----------------|------------|--------------|----------------|------------------------|------------------|----------------------------------------|
| <b>Statin effects on dementia outcomes</b> |                    |             |                 |                |            |              |                |                        |                  |                                        |
| Chu 2018                                   | All cause dementia | 16          | RR 0.849        | 0.787 to 0.916 | SS         | 2,745,149    | Moderate       |                        | None             |                                        |
| Zhang 2018                                 | Dementia risk      | 31          | RR 0.85         | 0.80 to 0.89   | SS         | NR           | Critically low |                        | None             |                                        |
| Poly 2020                                  | All cause dementia | 30          | RR 0.83         | 0.79 to 0.87   | SS         | 9,162,509    | Critically low |                        | None             |                                        |
| Olmastroni 2022                            | Dementia           | 36          | OR 0.80         | 0.75 to 0.86   | SS         | 5,738,737    | Critically low |                        | Evidence of bias |                                        |
| McGuinness 2016                            | Incident dementia  | 1           | OR 1.00         | 0.61 to 1.65   | NSS        | 20,536       | High           |                        | NA               | Diagnostic criteria not defined in HPS |
| Chu 2018                                   | Alzheimer's        | 14          | RR 0.719        | 0.576 to 0.899 | SS         | 52,218       | Moderate       |                        | Evidence of bias |                                        |
| Zhang 2018                                 | Alzheimer's        | 23          | RR 0.81         | 0.73 to 0.89   | SS         | NR           | Critically low |                        | None             |                                        |
| Poly 2020                                  | Alzheimer's        | 20          | RR 0.69         | 0.60 to 0.80   | SS         | NR           | Critically low |                        | NA               |                                        |
| Olmastroni 2022                            | Alzheimer's        | 21          | OR 0.68         | 0.56 to 0.81   | SS         | 1,188,377    | Critically low |                        | None             |                                        |
| Chu 2018                                   | MCI                | 6           | RR 0.737        | 0.556 to 0.976 | SS         | 6,808        | Moderate       |                        | Evidence of bias |                                        |
| Chu 2018                                   | Vascular dementia  | 3           | RR 1.012        | 0.62 to 1.652  | NSS        | 5,987        | Moderate       |                        | Evidence of bias |                                        |
| Poly 2020                                  | Vascular dementia  | 4           | RR 0.93         | 0.74 to 1.16   | NSS        | NR           | Critically low |                        | NA               |                                        |

| Study                               | Outcome                               | No. studies | Effect estimate | 95% CI          | SS or NSS? | No. patients | Quality of SR* | Notes for indirectness | Publication bias | Other notes                                   |
|-------------------------------------|---------------------------------------|-------------|-----------------|-----------------|------------|--------------|----------------|------------------------|------------------|-----------------------------------------------|
| Zhang 2018                          | Non-Alzheimer dementia                | 6           | RR 0.81         | 0.73 to 0.89    | SS         | NR           | Critically low |                        | None             |                                               |
| <b>Statins effects on cognition</b> |                                       |             |                 |                 |            |              |                |                        |                  |                                               |
| McGuinness 2016                     | MMSE score                            | 1           | MD 0.06         | -0.04 to 0.16   | NSS        | 5,804        | High           | Not serious            | NA               |                                               |
| Xuan 2020                           | MMSE score                            | 5           | WMD 1.40        | -0.62 to 3.43   | NSS        | NR           | High           | Not serious            | None             |                                               |
| McGuinness 2016                     | Telephone interview                   | 1           | OR 0.97         | 0.91 to 1.04    | NSS        | 20,536       | High           |                        |                  |                                               |
| McGuinness 2016                     | Stroop test                           | 1           | MD 0.8 s        | -0.40 to 2.00 s | NSS        | 5,804        | High           | Serious                | NA               | Outcome measured in seconds                   |
| Xuan 2020                           | ADAS-Cog                              | 4           | WMD -0.21       | -4.41 to 3.98   | NSS        | NR           | High           | Not serious            | None             | Results including placebo are in sub-analysis |
| Xuan 2020                           | ADL                                   | 3           | WMD -3.36       | -8.15 to 1.43   | NSS        | NR           | High           | Not serious            | None             | Results including placebo are in sub-analysis |
| Xuan 2020                           | Neuropsychiatric Inventory Scale      | 3           | WMD -1.66       | -2.61 to -0.70  | SS         | NR           | High           | Not serious            | None             | Results including placebo are in sub-analysis |
| <b>Statin adverse events</b>        |                                       |             |                 |                 |            |              |                |                        |                  |                                               |
| McGuinness 2016                     | Discontinuation due to adverse events | 2           | OR 0.94         | 0.83 to 1.05    | NSS        | 26,340       | High           | Not serious            | NA               |                                               |
| Davis 2020                          | Adverse events                        | 2           | OR 1.21         | 0.83 to 1.77    | NSS        | 1,045        | High           | Not serious            | NA               |                                               |

\*Evaluated using AMSTAR.

ADAS-Cog = Alzheimer's Disease Assessment Scale-Cognitive subscale; ADL = activities of daily living; CI = confidence interval; MCI = mild cognitive impairment; MD = mean difference; MMSE = mini mental state examination; NA = not applicable; NR = not reported; NSS = not statistically significant; OR = odds ratio; RR = risk ratio; SR = systematic review; SS = statistically significant; WMD = weighted mean difference

***Table 3a: Quality assessment of systematic reviews of randomized controlled trials using AMSTAR***

| Study           | Duplicate study selection and data extraction? | Comprehensive literature search performed? | Characteristics of the included studies provided? | Scientific quality of included studies assessed & documented? | Methods used to combine the findings of studies appropriate? | Was the conflict of interest stated? | Publication bias formally assessed? | Total score out of 7 (1 point for yes, 0 for no) |
|-----------------|------------------------------------------------|--------------------------------------------|---------------------------------------------------|---------------------------------------------------------------|--------------------------------------------------------------|--------------------------------------|-------------------------------------|--------------------------------------------------|
| McGuinness 2016 | Yes                                            | Yes                                        | Yes                                               | Yes                                                           | Yes                                                          | Yes                                  | Yes                                 | 7                                                |
| Davis 2020      | Yes                                            | Yes                                        | Yes                                               | Yes                                                           | Yes                                                          | Yes                                  | Yes                                 | 7                                                |
| Xuan 2020       | Yes                                            | Yes                                        | Yes                                               | Yes                                                           | Yes                                                          | Yes                                  | Yes                                 | 7                                                |

***Table 3b: Quality assessment of systematic reviews of observational studies using AMSTAR-2***

| Study           | AMSTAR-2 rating | Rationale                                                                                                                                                  |
|-----------------|-----------------|------------------------------------------------------------------------------------------------------------------------------------------------------------|
| Chu 2018        | Moderate        | Multiple non-critical flaws                                                                                                                                |
| Olmastroni 2022 | Critically low  | No prespecified protocol; no list of excluded studies                                                                                                      |
| Poly 2020       | Critically low  | No prespecified protocol; no list of excluded studies                                                                                                      |
| Zhang 2018      | Critically low  | No prespecified protocol; no list of excluded studies, methods not adequately described, did not consider risk of bias when interpreting results of review |

AMSTAR-2 = Assessment of Multiple Systematic Reviews

***Table 3c: Quality assessment of randomized controlled trials using the Cochrane Risk of Bias tool***

| Study      | Random sequence generation | Allocation concealment | Blinding of participants | Blinding of personnel/physicians | Blinding of outcome assessors | Loss to follow up | Selective outcome reporting | Comments                                                   |
|------------|----------------------------|------------------------|--------------------------|----------------------------------|-------------------------------|-------------------|-----------------------------|------------------------------------------------------------|
| Bosch 2019 | Low risk                   | Unclear risk           | Low risk                 | Low risk                         | Unclear risk                  | Unclear risk      | Unclear risk                | Significant number of participants had undescribed "other" |

| Study      | Random sequence generation | Allocation concealment | Blinding of participants | Blinding of personnel/physicians | Blinding of outcome assessors | Loss to follow up | Selective outcome reporting | Comments                                    |
|------------|----------------------------|------------------------|--------------------------|----------------------------------|-------------------------------|-------------------|-----------------------------|---------------------------------------------|
|            |                            |                        |                          |                                  |                               |                   |                             | reasons" to be excluded from final analysis |
| Zhang 2019 | Low risk                   | Unclear risk           | Low risk                 | Low risk                         | Unclear risk                  | Low risk          | Unclear risk                |                                             |
| Hu 2020    | Low risk                   | Unclear risk           | Low risk                 | Low risk                         | Unclear risk                  | Low risk          | Unclear risk                |                                             |

*Table 4: GRADE certainty of evidence for the effect of statin treatment on incidence of dementia*

**Treatment:** statins

**Outcome:** incidence of dementia

| Study design | No. studies (no. patients) | Risk of bias | Inconsistency | Imprecision                                       | Indirectness                                                       | Publication bias | Effect estimate               | Median (IQR) | Overall rating                                                                        |
|--------------|----------------------------|--------------|---------------|---------------------------------------------------|--------------------------------------------------------------------|------------------|-------------------------------|--------------|---------------------------------------------------------------------------------------|
| SR of RCTs   | 1                          | Not serious  | Not serious   | Serious<br>CI includes important benefit and harm | Serious<br>Cognitive assessments & outcomes all secondary analyses | Undetected       | RR 1.00 (95% CI 0.61 to 1.65) | NA           | Low<br><br>This outcome has two serious (-2) therefore <b>downgrade by two to low</b> |

CI = confidence interval; GRADE = Grading of Recommendations, Assessment, Development, and Evaluations; IQR = inter-quartile range; NA = not applicable; RCT = randomized controlled trial; RR = risk ratio; SR = systematic review

*Table 5: Summary of recommendations from major guidelines published within the past 5 years*

| Our question                                                           | 2018 AHA <sup>1</sup>                             | 2019 ESC Dyslipidemia <sup>2</sup>                       | 2020 VA <sup>3</sup> | 2021 CCS <sup>4</sup> | 2021 ESC CVD Prevention <sup>5</sup> | 2022 USPSTF <sup>6</sup>                                                                                             |
|------------------------------------------------------------------------|---------------------------------------------------|----------------------------------------------------------|----------------------|-----------------------|--------------------------------------|----------------------------------------------------------------------------------------------------------------------|
| In patients on statin therapy, do statins negatively affect cognition, | RCTs have not shown reduced effects on cognition. | The suggested effect on Alzheimer's disease was recently | NR                   | NR                    | NR                                   | Adverse effects on cognition have been linked with statins but not clearly established, with some studies showing no |



| <b>Our question</b>                                           | <b>2018 AHA<sup>1</sup></b>                                                                               | <b>2019 ESC Dyslipidemia<sup>2</sup></b>                                                        | <b>2020 VA<sup>3</sup></b> | <b>2021 CCS<sup>4</sup></b> | <b>2021 ESC CVD Prevention<sup>5</sup></b> | <b>2022 USPSTF<sup>6</sup></b>                                                                                                                                                             |
|---------------------------------------------------------------|-----------------------------------------------------------------------------------------------------------|-------------------------------------------------------------------------------------------------|----------------------------|-----------------------------|--------------------------------------------|--------------------------------------------------------------------------------------------------------------------------------------------------------------------------------------------|
| memory, cognitive decline, or dementia compared to no statin? | Frequency = rare. Evidence = case report; no increase in memory/cognition problems in 3 large-scale RCTs. | reviewed in a Cochrane analysis reporting no conclusive effect from statins (McGuinness 2016a). |                            |                             |                                            | association. Some studies suggest statins may reduce risk of dementia. Evidence on the association between statin use... and cognitive harms was sparse but indicated no increase in risk. |

<sup>1</sup>Grundy 2018; <sup>2</sup>Mach 2020; <sup>3</sup>Management of Dyslipidemia for Cardiovascular Risk Reduction Work Group 2020; <sup>4</sup>Pearson 2021; <sup>5</sup>Visseren 2021; <sup>6</sup>US Preventive Services Task Force 2022

NR = not reported; RCT = randomized controlled trial

## **CHAPTER 8A: STATIN INTOLERANCE – RECHALLENGING**

### **CLINICAL QUESTION**

In patients reporting muscle-related symptoms caused by statins, does rechallenging, switching statins, using a lower dose, or use of an alternate dosing strategy improve statin use?

### **BOTTOM LINE**

Most muscle-related complaints in people taking a statin are not statin-induced, with an increase in muscle symptoms between placebo and statins in large randomized controlled trials (RCTs) being <1%. RCT evidence also shows people with a history of statin intolerance cannot differentiate whether they are taking a statin or a placebo, and most of them will tolerate a statin when rechallenged.

### **EVIDENCE**

Results statistically significant unless indicated. GRADE certainty of evidence evaluation can be found in *Table 1*.

#### **Risk of muscle-related adverse events associated with statins**

- Systematic reviews (SRs) show the vast majority of muscle symptoms experienced by individuals using a statin are not caused by statins (**Cai 2021, Chou 2022, CTTC 2022, Davis 2021, Irwin 2018, Wang 2022, Yebyo 2019, Zhou 2020**)
  - Results from a large 2022 patient-level data SR of large randomized double-blind trials including 23 trials and 154,664 participants followed for a weighted median duration of 4.3 years (**CTTC 2022**)
    - Any muscle symptoms (e.g., pain, weakness, cramping) at any time: statins 27.1% versus placebo 26.6%
    - Any muscle symptoms within the first year: statins 14.0% versus placebo 14.8%
      - After first year: statins 14.8% versus placebo 15.0% (not statistically different)
    - Any muscle symptoms associated with less versus more intense statin treatment: more intense 36.1% versus less intense 34.8%
  - Other SRs found similar results (**Cai 2021, Chou 2022, Davis 2021, Irwin 2018, Wang 2022, Yebyo 2019, Zhou 2020**)
    - No difference by statin type (**Cai 2021**) (one network meta-analysis found conflicting results [**Wang 2022**]), lipophilic/hydrophilic statin (**Irwin 2018**), or age (**Chou 2022, CTTC 2022, Irwin 2018**)
    - No difference in discontinuation for muscle symptoms (**Zhou 2020**), or any adverse event (**Chou 2022, Yebyo 2019, Zhou 2020**)
  - A SR comparing blinded and open-label use of statins found a higher rate of muscle symptoms when participants are not blinded to the treatment with an estimated of 40-80% of muscle symptoms or statin discontinuation due to the drucebo effect, defined as a combination of placebo and nocebo effect (**Penso 2018**)

### Management of muscle symptoms in individuals using a statin

- Re-challenging
  - **Herrett 2021, Joy 2014, Wood 2020:** three n-of-1 trials of individuals (N = 8-200) with a history of statin intolerance randomized to 3-4 cycles of ~3-8 weeks of statin or placebo, with one of the trials also including a no-treatment arm (**Wood 2020**). At least 2 weeks between cycles or before assessing symptoms on a new cycle. Symptom scores (scale = 0-100; higher worse)
    - Statin versus placebo: not statistically different
    - Statin versus nocebo (adverse events due to placebo) (**Wood 2020**): 16 versus 8 (nocebo)
  - **Tudor 2022:** one n-of-1 trial of 93 patients (82% were taking statins for primary prevention) who had either declined or were intolerant of statins investigated both a behavioral intervention (physician discussion around patient concerns regarding statin vs. usual care) as well as a cross-over design (randomly alternating between placebo and 20 mg of atorvastatin in both blinded and unblinded groups)
    - Patient physician discussion resulted in 45% of patients successfully restarting a statin at 6 months vs. 20% for usual care
    - Blinded vs. unblinded to medication: no difference in successfully restarting statins at 6 months
  - **Nissen 2016:** one RCT evaluating PCSK-9 inhibitors versus ezetimibe included a pre-trial phase during which atorvastatin 20mg and placebo were given for 10 weeks in a cross-over fashion to participants with a history of intolerance to at least two statins
    - 472 participants completed the run-in phase
      - 43% of participants experienced intolerable muscle symptoms with atorvastatin but not with the placebo
  - **Moriarty 2015:** one RCT randomized 314 participants with a previous intolerance to at least two statins to alirocumab, ezetimibe, or atorvastatin 20mg once a day for 24 weeks, following a 4 weeks placebo run-in phase
    - Discontinuation due to skeletal muscle-related symptoms: atorvastatin 22%, alirocumab 16% and ezetimibe 20%
  - **Taylor 2015:** one RCT evaluating the efficacy of Q10 coenzyme supplements in preventing statin-related muscle symptoms initially randomized in a cross-over fashion 120 individuals with a history of statin intolerance to simvastatin 20mg once a day or placebo for 8 weeks
    - 41 individuals (34%) developed myalgias with simvastatin but not with the placebo
  - **Kristiansen 2021:** one RCT examined rechallenging 71 patients with atorvastatin (any dose) related muscle related symptoms with a placebo crossover design (40 mg of atorvastatin for 7 weeks vs. placebo for 7 weeks with 1-week washouts in between treatment arms)

- No difference in muscle symptom intensity overall between the two groups
- Switching to a different statin
  - **Stein 2008**: one double-blind RCT randomized 199 individuals with a history of muscle-related intolerance to a statin (other than fluvastatin) to fluvastatin 80mg, ezetimibe 10mg, or a combination of both for 12 weeks
    - Muscle related adverse event: fluvastatin 17%, ezetimibe 24%, combination 14%
    - Withdrawals due to muscle-related adverse event: fluvastatin 4%, ezetimibe 8%, combination 3%
- Using a lower dose of the same statin
  - No RCT comparing different doses of statins in individuals with a history of statin intolerance identified
  - Results from meta-analysis of RCTs looking at statins efficacy are conflicting, with some suggesting a dose-related tolerance (**CTTC 2022, Davis 2021**) and others (**Cai 2021, Wang, 2022**) not finding any difference
- Alternate dosing
  - **Awad 2017**: one SR of RCTs or quasi RCTs comparing alternate to daily dosing of statins
    - 12 RCTs (N = 37-284) and 1 quasi-RCT (N = 1023); 6-16 weeks
      - 11 RCTs compared the same dose q2d (once every 2 days) vs once a day
      - 2 RCTs compared double dosing q2d vs single dosing once a day
    - No difference (atorvastatin and rosuvastatin) on triglyceride levels
    - Total cholesterol (mean difference [MD] 12mg/L) and LDL (MD 8mg/L) improved with daily versus alternate day dosing
    - No patient-oriented outcomes reported or usable data for adverse events
  - **Muhammad 2019**: other SR with similar results, also without numbers for muscle symptoms

## CONTEXT

A SR of recommendations for statin intolerance management including 26 articles found various recommendations (**Saxon 2016**)

- Most articles (88%) recommend excluding other causes for symptoms first
- Some recommend specific laboratory tests: CK (62%), ALT (12%), vitamin D (38%)
- Almost all recommend stopping the statin used (96%) but all recommend rechallenging with a statin, either a lower dose (96%), a different statin (92%) or an alternate day dosing regimen (77%)
- A wash-out period of 2 to 6 weeks before rechallenging is often recommended (50%)
- Switching to a non-statin therapy in monotherapy (58%) or adding a non-statin therapy (100%) is also recommended
- The risk associated with rechallenging statins in individuals with a history of severe muscle-related adverse event is unclear

Observational data also supports the fact that a large majority of individuals with a history of statin muscle-related intolerance can find a well-tolerated statin regimen. For example, in a large US cohort study including 6,579 individuals with a history of statin discontinuation due to adverse events, some form of statin treatment could be reinstated in 92% of them (**Zhang 2013**).

#### Recent guideline recommendations

See *Table 2* for a summary of recommendations relating to statin intolerance and rechallenging from recent major guidelines.

#### REFERENCES

- Awad K, Mikhailidis DP, Toth PP, Jones SR, Moriarty P, Lip GYH, et al; Lipid and Blood Pressure Meta-analysis Collaboration (LBPMC) Group. Efficacy and safety of alternate-day versus daily dosing of statins: a systematic review and meta-analysis. *Cardiovasc Drugs Ther.* 2017;31(4):419-431.
- Cai T, Abel L, Langford O, Monaghan G, Aronson JK, Stevens RJ, et al. Associations between statins and adverse events in primary prevention of cardiovascular disease: systematic review with pairwise, network, and dose-response meta-analyses. *BMJ.* 2021;374:n1537.
- Cholesterol Treatment Trialists' Collaboration. Effect of statin therapy on muscle symptoms: an individual participant data meta-analysis of large-scale, randomised, double-blind trials. *Lancet.* 2022;400(10355):832-845.
- Chou R, Cantor A, Dana T, Wagner J, Ahmed AY, Fu R, et al. Statin use for the primary prevention of cardiovascular disease in adults: updated evidence report and systematic review for the US Preventive Services Task Force. *JAMA.* 2022;328(8):754-771.
- Davis JW, Weller SC. Intensity of statin therapy and muscle symptoms: a network meta-analysis of 153 000 patients. *BMJ Open.* 2021;11(6):e043714.
- Grundy SM, Stone NJ, Bailey AL, et al. 2018 AHA/ACC/AACVPR/AAPA/ABC/ACPM/ADA/AGS/APhA/ASPC/NLA/PCNA guideline on the management of blood cholesterol: a report of the American College of Cardiology/American Heart Association Task Force on Clinical Practice Guidelines. *Circulation.* 2019;139:e1082-e1143. doi: 10.1161/CIR.0000000000000625
- Herrett E, Williamson E, Brack K, Beaumont D, Perkins A, Thayne A, et al; StatinWISE Trial Group. Statin treatment and muscle symptoms: series of randomised, placebo controlled n-of-1 trials. *BMJ.* 2021;372:n135.
- Irwin JC, Khalesi S, Fenning AS, Vella RK. The effect of lipophilicity and dose on the frequency of statin-associated muscle symptoms: a systematic review and meta-analysis. *Pharmacol Res.* 2018;128:264-273.
- Joy TR, Monjed A, Zou GY, Hegele RA, McDonald CG, Mahon JL. N-of-1 (single-patient) trials for statin-related myalgia. *Ann Intern Med.* 2014;160(5):301-310.
- Kristiansen O, Vethe NT, Peersen K, Fagerland MW, Sverre E, Prunés Jensen E, et al. Effect of atorvastatin on muscle symptoms in coronary heart disease patients with self-

perceived statin muscle side effects: a randomized, double-blinded crossover trial. *Eur Heart J Cardiovasc Pharmacother.* 2021;7(6):507-516.

- Mach F, Baigent C, Catapano AL, Koskinas KC, Casula M, Badimon L et al. 2019 ESC/EAS Guidelines for the management of dyslipidaemias: lipid modification to reduce cardiovascular risk. *Eur Heart J.* 2020;41(1):111-188. doi: 10.1093/eurheartj/ehz455.
- The Management of Dyslipidemia for Cardiovascular Risk Reduction Work Group. VA/DoD clinical practice guideline for the management of dyslipidemia for cardiovascular risk reduction. US Department of Veterans Affairs, Department of Defense. 2020. 127 p.
- Meza-Contreras A, Wenczenovicz C, Ruiz-Arellanos K, Vesely EAK, Mogollon R, Montori VM. Statin intolerance management: a systematic review. *Endocrine.* 2022. doi: 10.1007/s12020-022-03263-w. Epub ahead of print.
- Moriarty PM, Thompson PD, Cannon CP, Guyton JR, Bergeron J, Zieve FJ, et al; ODYSSEY ALTERNATIVE Investigators. Efficacy and safety of alirocumab vs ezetimibe in statin-intolerant patients, with a statin rechallenge arm: The ODYSSEY ALTERNATIVE randomized trial. *J Clin Lipidol.* 2015;9(6):758-769.
- Muhammad ZA, Ahmad T, Baloch N. Can alternate-day statin regimen minimize its adverse effects on muscle and tendon? A systematic review. *J Pak Med Assoc.* 2019;69(7):1006-1013.
- Nissen SE, Stroes E, Dent-Acosta RE, Rosenson RS, Lehman SJ, Sattar N, et al; GAUSS-3 Investigators. Efficacy and tolerability of evolocumab vs ezetimibe in patients with muscle-related statin intolerance: the GAUSS-3 randomized clinical trial. *JAMA.* 2016;315(15):1580-1590.
- Pearson GJ, Thanassoulis G, Anderson TJ, et al. 2021 Canadian Cardiovascular Society guidelines for the management of dyslipidemia for the prevention of cardiovascular disease in adults. *Can J Cardiol.* 2021;37:1129-1150.
- Penson PE, Mancini GBJ, Toth PP, Martin SS, Watts GF, Sahebkar A, et al; Lipid and Blood Pressure Meta-Analysis Collaboration (LBPMC) Group & International Lipid Expert Panel (ILEP). Introducing the 'Drucebo' effect in statin therapy: a systematic review of studies comparing reported rates of statin-associated muscle symptoms, under blinded and open-label conditions. *J Cachexia Sarcopenia Muscle.* 2018;9(6):1023-1033.
- Saxon DR, Eckel RH. Statin intolerance: a literature review and management strategies. *Prog Cardiovasc Dis.* 2016;59(2):153-164. doi: 10.1016/j.pcad.2016.07.009.
- Stein EA, Ballantyne CM, Windler E, Sirnes PA, Sussekov A, Yigit Z, et al. Efficacy and tolerability of fluvastatin XL 80 mg alone, ezetimibe alone, and the combination of fluvastatin XL 80 mg with ezetimibe in patients with a history of muscle-related side effects with other statins. *Am J Cardiol.* 2008;101(4):490-496.
- Taylor BA, Lorson L, White CM, Thompson PD. A randomized trial of coenzyme Q10 in patients with confirmed statin myopathy. *Atherosclerosis.* 2015;238(2):329-335.
- Tudor K, Brooks J, Howick J, Fox R, Aveyard P. Unblinded and blinded n-of-1 trials versus usual care: a randomized controlled trial to increase statin uptake in primary care. *Circ Cardiovasc Qual Outcomes.* 2022;15(6):e007793.

- US Preventive Services Task Force. Statin use for the primary prevention of cardiovascular disease in adults US Preventive Services Task Force recommendation statement. *JAMA*. 2022;328(8):746-753. doi:10.1001/jama.2022.13044
- Visseren FL, Mach F, Smulders YM, Carballo D, Koskinas KC, Bäck M et al. ESC Guidelines on cardiovascular disease prevention in clinical practice: Developed by the Task Force for cardiovascular disease prevention in clinical practice with representatives of the European Society of Cardiology and 12 medical societies With the special contribution of the European Association of Preventive Cardiology (EAPC). *Eur Heart J*. 2021;42(34):3227-337.
- Wang X, Li J, Wang T, Zhang Z, Li Q, Ma D, et al. Associations between statins and adverse events in secondary prevention of cardiovascular disease: pairwise, network, and dose-response meta-analyses of 47 randomized controlled trials. *Front Cardiovasc Med*. 2022;9:929020.
- Wood FA, Howard JP, Finegold JA, Nowbar AN, Thompson DM, Arnold AD, et al. N-of-1 trial of a statin, placebo, or no treatment to assess side effects. *N Engl J Med*. 2020;383(22):2182-2184.
- Yebyo HG, Aschmann HE, Kaufmann M, Puhon MA. Comparative effectiveness and safety of statins as a class and of specific statins for primary prevention of cardiovascular disease: a systematic review, meta-analysis, and network meta-analysis of randomized trials with 94,283 participants. *Am Heart J*. 2019;210:18-28.
- Zhang H, Plutzky J, Skentzos S, Morrison F, Mar P, Shubina M, et al. Discontinuation of statins in routine care settings: a cohort study. *Ann Intern Med*. 2013;158(7):526-534.
- Zhou Z, Albarqouni L, Curtis AJ, Breslin M, Nelson M. The safety and tolerability of statin therapy in primary prevention in older adults: a systematic review and meta-analysis. *Drugs Aging*. 2020

## METHODS

- Pubmed - All time (December 2022; limited to articles in English)
  - Title: \*statin\* AND intolera\*
    - No filter
    - 218 results
  - Title: \*statin\* AND adverse
    - 250 results
- Google scholar
- Uptodate
- Similar article search
- Reference search
- Help from a team working on a muscle intolerance tools for practice

## APPENDIX

***Table 1: GRADE certainty of evidence for tolerance for rechallenging statins in patients identified as intolerant***

Treatment: Statin rechallenge

Outcome: Statin tolerance

| Study design | No. studies (no. patients) | Risk of bias | Inconsistency | Imprecision | Indirectness | Publication bias | Effect estimate | Overall rating                             |
|--------------|----------------------------|--------------|---------------|-------------|--------------|------------------|-----------------|--------------------------------------------|
| RCT          | 8 (1,338)                  | Not serious  | Not serious   | Not serious | Not serious  | Undetected       | NA              | High<br><br>This outcome has no downgrades |

GRADE = Grading of Recommendations, Assessment, Development, and Evaluations; RCT = randomized controlled trial

***Table 2: Summary of recommendations from major guidelines published within the past 5 years***

| Our question                                                                                                                                                       | 2018 AHA <sup>1</sup>                                                                                                                                                                                                                                                                                             | 2019 ESC Dyslipidemia <sup>2</sup>                                                                                                                                                                                                                                                                                                                                     | 2020 VA <sup>3</sup>                                                                                                                                                                                                                                                                                                                                                                                                                                                                            | 2021 CCS <sup>4</sup>                                                 | 2021 ESC CVD Prevention <sup>5</sup>                                                                                                                                                                                                                                          | 2022 USPSTF <sup>6</sup> |
|--------------------------------------------------------------------------------------------------------------------------------------------------------------------|-------------------------------------------------------------------------------------------------------------------------------------------------------------------------------------------------------------------------------------------------------------------------------------------------------------------|------------------------------------------------------------------------------------------------------------------------------------------------------------------------------------------------------------------------------------------------------------------------------------------------------------------------------------------------------------------------|-------------------------------------------------------------------------------------------------------------------------------------------------------------------------------------------------------------------------------------------------------------------------------------------------------------------------------------------------------------------------------------------------------------------------------------------------------------------------------------------------|-----------------------------------------------------------------------|-------------------------------------------------------------------------------------------------------------------------------------------------------------------------------------------------------------------------------------------------------------------------------|--------------------------|
| In patients reporting muscle-related symptoms caused by statins, does rechallenging, switching statins, using a lower dose, or use of an alternate dosing strategy | Several creatively designed randomized crossover trials in patients with SAMS <sup>55-3-</sup> <sub>55-7</sub> support a management strategy of statin discontinuation until symptoms improve, followed by rechallenge with a reduced dose, alternative agent, or alternative dosing regimen while monitoring for | While statins rarely cause serious muscle damage (myopathy, or rhabdomyolysis in the most severe cases), there is much public concern that statins may commonly cause less serious muscle symptoms. Such statin ‘intolerance’ is frequently encountered by practitioners and may be difficult to manage. However, placebo-controlled randomized trials have shown very | A washout period (i.e., a short-term interruption of a statin), should be implemented to evaluate whether the perceived adverse event is related to a statin. The optimal duration of the washout period was not clear in the available evidence. Based on statin half-lives, an interruption of 2 – 4 weeks is reasonable. Statin treatment then can be reinitiated with the same statin (if symptoms were deemed non-statin related), or with a different statin at recommended intensity (if | “Maximally tolerated statin dose”<br>No mention of switching statins. | In practice, management of a patient with myalgia but without a major increase in creatine kinase is based on trial and error, and usually involves switching to a different statin or use of a very low dosage several days a week, with a gradual increase in frequency and | NR                       |



| <b>Our question</b> | <b>2018 AHA<sup>1</sup></b>                                                                                                                                                                                      | <b>2019 ESC Dyslipidemia<sup>2</sup></b>                                                                                                                                      | <b>2020 VA<sup>3</sup></b>                                                                                                                                                                                                                                                                                              | <b>2021 CCS<sup>4</sup></b> | <b>2021 ESC CVD Prevention<sup>5</sup></b>                        | <b>2022 USPSTF<sup>6</sup></b> |
|---------------------|------------------------------------------------------------------------------------------------------------------------------------------------------------------------------------------------------------------|-------------------------------------------------------------------------------------------------------------------------------------------------------------------------------|-------------------------------------------------------------------------------------------------------------------------------------------------------------------------------------------------------------------------------------------------------------------------------------------------------------------------|-----------------------------|-------------------------------------------------------------------|--------------------------------|
| improve statin use? | recurrent symptoms. If the approach of reassess, rediscuss (net clinical benefit), and rechallenge is used, a majority of patients will be able to be successfully treated with at least one or several statins. | clearly that true statin intolerance is rare, and that it is generally possible to institute some form of statin therapy (e.g., by changing the statin or reducing the dose). | symptoms resolved after discontinuation). If intolerance persists, providers could consider decreases in dosage. Also, intermittent dosing is an acceptable option in patients with continued tolerance issues. Only in the rare case of a serious adverse event (e.g., rhabdomyolysis) should statins be discontinued. |                             | dosage. A management algorithm may help to manage these patients. |                                |

<sup>1</sup>Grundy 2018; <sup>2</sup>Mach 2020; <sup>3</sup>Management of Dyslipidemia for Cardiovascular Risk Reduction Work Group 2020; <sup>4</sup>Pearson 2021; <sup>5</sup>Visseren 2021; <sup>6</sup>US Preventive Services Task Force 2022

NR = not reported; SAMS = statin-associated muscle symptoms

## **CHAPTER 8B: STATIN INTOLERANCE – OTHER DRUGS**

### **CLINICAL QUESTION**

In patients intolerant of statins, do any lipid-lowering drugs lower the risk of cardiovascular disease compared to no statin?

### **BOTTOM LINE**

When used in monotherapy, fibrates reduce major adverse cardiovascular events (MACE) by approximately 20% but also has no effect on cardiovascular (CV) or all-cause mortality. Ezetimibe might reduce MACE but has no effect on CV or all-cause mortality and evidence is limited to one open-label trial with major limitations. When added to a statin, icosapent ethyl and proprotein convertase subtilisin/kexin type 9 (PCSK9) inhibitors reduce MACE by approximately 25% and 15%, respectively, but have no effect on mortality. However, their benefit in monotherapy is unknown. Bile acid sequestrants (BAS) and niacin have not demonstrated a benefit on MACE or mortality, although the data for BAS is inconsistent. The decision to initiate non-statin lipid lowering drugs should involve informed shared decision-making.

### **EVIDENCE**

Results statistically significant unless otherwise stated. GRADE certainty of evidence evaluation can be found in *Tables 1A-E*.

#### **Bile acid sequestrants**

- Two large double-blind randomized controlled trials (RCTs) from the pre-statin era
- **Lipid Research Clinics Coronary Primary Prevention Trial 1984:** RCT comparing 24g of cholestyramine a day versus placebo (N = 3,806; mean age 48; 100% male; mean follow-up 7.4 years)
  - Patients with primary hypercholesterolemia and at high risk for coronary heart disease (CHD)
  - Primary composite outcome of CHD death and myocardial infarction (MI)
    - Cholestyramine 8.1% versus placebo 9.8%
    - Relative risk (RR) 0.83, 95% confidence interval (CI) 0.67 to 1.01\*
  - No difference on definite CHD, definite nonfatal MI, all-cause mortality, definite or suspect atherothrombotic brain infarction or transient ischemic attack
- **Dorr 1978:** RCT comparing 5g of colestipol daily to a placebo in patients with hypercholesterolemia (N = 2,278; mean age 54; 52% female; 26% CHD; 20% hypertensive; 16% type II diabetes; follow-up 1-3 years)
  - Outcomes reported by gender
  - In men, colestipol reduced death from any CV cause (2% versus 4.4% with placebo; p<0.02) and death from CHD (1.6% versus 4.0% with placebo; p<0.02)
    - No statistically significant difference in all-cause mortality, death from acute MI, or death from all vascular diseases
  - In women, only all-cause mortality and death from CHD were reported, with no difference between groups

- Two very small RCTs with 53 (**Brensike 1984**) and 143 participants (**Watts 1992**) found no difference between BAS and placebo on patient-oriented outcomes

### Ezetimibe

- **Zhan 2018**: Cochrane systematic review (SR) that looked at ezetimibe, but only found RCTs with participants using a statin in the control group
- **Ouchi 2019** (Ewtopia-75 trial): open-label RCT conducted in Japan comparing ezetimibe 10mg once a day to no treatment in patients with no history of CHD and not using any lipid-lowering therapy (N = 3,796; age ≥75 years, mean ≈ 81)
  - Results at 5 years
    - Ezetimibe reduced the primary composite outcome of sudden cardiac death, MI, coronary revascularization, or stroke (5.2% versus 7.8%; hazard ratio [HR] = 0.66; number needed to treat [NNT] = 39)
    - No effect on CV or all-cause mortality
  - Limitations: open-label design, early termination, participants with no contraindication for statins, 28% of participants withdrew or were lost to follow up
- **Nissen 2016, Moriarty 2015, Stroes 2014**: 3 RCTs that compared ezetimibe to a PCSK9 inhibitor in patients intolerant to statins, but reported no patient-oriented outcomes

### Fibrates

- **Keene 2014**: SR that evaluated the efficacy of fibrates without a statin (17 RCTs; N = 30,523; follow-up 2.5-7 years)
  - Reduction in non-fatal MIs in fibrates compared to placebo
    - 5.4% (fibrates) versus 7.4% (placebo)
      - RR 0.78 (95% CI 0.71 to 0.86)
  - No difference in all-cause mortality, CHD mortality, or stroke
- **Jakob 2016**: Cochrane SR that evaluated the efficacy of fibrates specifically in primary prevention patients not using a statin (4 RCTs; N = 12,153; follow-up 2-5 years)
  - Fibrates reduced MACE (composed of CV mortality, MI, and stroke)
    - 4.8% (fibrates) versus 6.0% (placebo)
      - RR 0.79 (95% CI 0.68 to 0.92)
  - No effect on all-cause mortality

### Niacin

- **D'Andrea 2019**: SR looking at niacin for CV prevention in patients not using a statin (9 RCTs; N = 5,375; follow-up 2-5 years)
  - Reduction in acute coronary syndrome
    - 9.3% (niacin) versus 13.2% (placebo); RR 0.74 (95% CI 0.58 to 0.96)
  - Reduction in stroke
    - 6.5% (niacin) versus 9.8% (placebo); RR 0.75 (95% CI 0.59 to 0.94)
  - Reduction in revascularization procedures
    - 3.0% (niacin) versus 5.4% (placebo); RR 0.51 (95% CI 0.37 to 0.72)
  - No difference on MACE or CHD mortality

### Icosapent ethyl

- No relevant RCT evaluating icosapent ethyl without a statin was identified
- Participants in both major trials looking at icosapent ethyl (REDUCE-IT [Bhatt 2019] and JELIS [Yokoyama 2007]) were using a statin
  - In these trials, icosapent ethyl led to a relative risk reduction (RRR) in MACE of 20-25% but had no effect on all-cause mortality

### PCSK9 inhibitors

- No relevant RCT evaluating PCSK9 inhibitors and reporting CV outcomes in participants not receiving a statin was identified
- When added to a statin, PCSK9 inhibitors led to a RRR of approximately 15% but had no effect on all-cause mortality (Dugré 2023)

\*Calculations made by PEER.

## CONTEXT

Statins have the most consistent evidence for CV disease prevention and mortality reduction, both in primary and secondary prevention (Dugré 2023). Statin intolerance is uncommon and should be reassessed before discussing a different lipid lowering therapy. In most cases, a statin can be restarted and tolerated (Cholesterol Treatment Trialists' Collaboration 2022, Meza-Contreras 2022, Zhang 2013).

Costs vary greatly from drug to drug. A 90-day supply costs about \$15 for ezetimibe, \$25 for fibrates, \$90 for icosapent ethyl, and \$1500 for PCSK9 inhibitors (McKesson Pharmalick 2023).

### Major guideline recommendations

See Table 2 for a summary of recommendations pertaining to statin intolerance and other drugs from recent major guidelines.

## REFERENCES

- Bhatt DL, Steg PG, Miller M, Brinton EA, Jacobson TA, Ketchum SB, et al. Cardiovascular risk reduction with icosapent ethyl for hypertriglyceridemia. *N Engl J Med*. 2019;380(1):11-22.
- Brensike JF, Levy RI, Kelsey SF, Passamani ER, Richardson JM, Loh IK, et al. Effects of therapy with cholestyramine on progression of coronary arteriosclerosis: results of the NHLBI type II coronary intervention study. *Circulation*. 1984;69(2):313-24.
- Cholesterol Treatment Trialists' Collaboration. Effect of statin therapy on muscle symptoms: an individual participant data meta-analysis of large-scale, randomised, double-blind trials. *Lancet*. 2022;400(10355):832-845.
- D'Andrea E, Hey SP, Ramirez CL, Kesselheim AS. Assessment of the role of niacin in managing cardiovascular disease outcomes: a systematic review and meta-analysis. *JAMA Netw Open*. 2019;2(4):e192224.

- Dorr AE, Gundersen K, Schneider JC, Spencer TW, Martin WB. Colestipol hydrochloride in hypercholesterolemic patients- effect on serum cholesterol and mortality. *J Chronic Dis*. 1978;31(1):5-14.
- Dugré N, Lindblad AJ, Perry D, Allan GM, Braschi E, Falk J, et al. PEER Umbrella systematic review of systematic reviews: lipid-lowering therapies for cardiovascular disease prevention and management in primary care. *Can Fam Physician*. Forthcoming 2023.
- Grundy SM, Stone NJ, Bailey AL, et al. 2018 AHA/ACC/AACVPR/AAPA/ABC/ACPM/ADA/AGS/APhA/ASPC/NLA/PCNA guideline on the management of blood cholesterol: a report of the American College of Cardiology/American Heart Association Task Force on Clinical Practice Guidelines. *Circulation*. 2019;139:e1082-e1143. doi: 10.1161/CIR.0000000000000625
- Jakob T, Nordmann AJ, Schandelmaier S, Ferreira-Gonzalez I, Briel M. Fibrates for primary prevention of cardiovascular disease events. *Cochrane Database Syst Rev*. 2016;11:CD009753.
- Keene D, Price C, Shun-Shin MJ, Francis DP. Effect on cardiovascular risk of high density lipoprotein targeted drug treatments niacin, fibrates, and CETP inhibitors: meta-analysis of randomised controlled trials including 117,411 patients. *BMJ*. 2014;349:g4379.
- Lipid Research Clinics Program. The lipid research clinics coronary primary prevention trial results. I. Reduction in incidence of coronary heart disease. *JAMA*. 1984;251(3):351-64.
- Mach F, Baigent C, Catapano AL, Koskinas KC, Casula M, Badimon L et al. 2019 ESC/EAS Guidelines for the management of dyslipidaemias: lipid modification to reduce cardiovascular risk. *Eur Heart J*. 2020;41(1):111-188. doi: 10.1093/eurheartj/ehz455.
- The Management of Dyslipidemia for Cardiovascular Risk Reduction Work Group. VA/DoD clinical practice guideline for the management of dyslipidemia for cardiovascular risk reduction. US Department of Veterans Affairs, Department of Defense. 2020. 127 p.
- McKesson Pharmaclik. <https://clients.mckesson.ca/catalog>. Accessed Feb 23, 2023.
- Meza-Contreras A, Wenczenovicz C, Ruiz-Arellanos K, Vesely EAK, Mogollon R, Montori VM. Statin intolerance management: a systematic review. *Endocrine*. 2022. doi: 10.1007/s12020-022-03263-w. Epub ahead of print.
- Moriarty PM, Thompson PD, Cannon CP, Guyton JR, Bergeron J, Zieve FJ, et al; ODYSSEY ALTERNATIVE Investigators. Efficacy and safety of alirocumab vs ezetimibe in statin-intolerant patients, with a statin rechallenge arm: The ODYSSEY ALTERNATIVE randomized trial. *J Clin Lipidol*. 2015;9(6):758-769. doi: 10.1016/j.jacl.2015.08.006.
- Nissen SE, Stroes E, Dent-Acosta RE, Rosenson RS, Lehman SJ, Sattar N, et al; GAUSS-3 Investigators. Efficacy and tolerability of evolocumab vs ezetimibe in patients with muscle-related statin intolerance: the GAUSS-3 randomized clinical trial. *JAMA*. 2016;315(15):1580-90. doi: 10.1001/jama.2016.3608.
- Ouchi Y, Sasaki J, Arai H, Yokote K, Harada K, Katayama Y, et al. Ezetimibe lipid-lowering trial on prevention of atherosclerotic cardiovascular disease in 75 or older (EWTOPIA 75): a randomized controlled trial. *Circulation*. 2019;140(12):992-1003. doi: 10.1161/CIRCULATIONAHA.118.039415.

- Pearson GJ, Thanassoulis G, Anderson TJ, et al. 2021 Canadian Cardiovascular Society guidelines for the management of dyslipidemia for the prevention of cardiovascular disease in adults. *Can J Cardiol*. 2021;37:1129-1150.
- Stroes E, Colquhoun D, Sullivan D, Civeira F, Rosenson RS, Watts GF, et al; GAUSS-2 Investigators. Anti-PCSK9 antibody effectively lowers cholesterol in patients with statin intolerance: the GAUSS-2 randomized, placebo-controlled phase 3 clinical trial of evolocumab. *J Am Coll Cardiol*. 2014;63(23):2541-2548. doi: 10.1016/j.jacc.2014.03.019.
- US Preventive Services Task Force. Statin use for the primary prevention of cardiovascular disease in adults US Preventive Services Task Force recommendation statement. *JAMA*. 2022;328(8):746-753. doi:10.1001/jama.2022.13044
- Visseren FL, Mach F, Smulders YM, Carballo D, Koskinas KC, Bäck M et al. ESC Guidelines on cardiovascular disease prevention in clinical practice: Developed by the Task Force for cardiovascular disease prevention in clinical practice with representatives of the European Society of Cardiology and 12 medical societies With the special contribution of the European Association of Preventive Cardiology (EAPC). *Eur Heart J*. 2021;42(34):3227-337.
- Watts GF, Lewis B, Brunt JNH, Lewis ES, Coltart DJ, Smith LDR, et al. Effects on coronary artery disease of lipid-lowering diet, or diet plus cholestyramine, in the St Thomas' Atherosclerosis Regression Study (STARS). *Lancet*. 1992;339(8793).
- Yokoyama M, Origasa H, Matsuzaki M, Matsuzawa Y, Saito Y, Ishikawa Y, et al. Effects of eicosapentaenoic acid on major coronary events in hypercholesterolaemic patients (JELIS): a randomised open-label, blinded endpoint analysis. *Lancet*. 2007;369(9567):1090-8.
- Zhan S, Tang M, Liu F, Xia P, Shu M, Wu X. Ezetimibe for the prevention of cardiovascular disease and all-cause mortality events. *Cochrane Database Syst Rev*. 2018;11(11):CD012502.
- Zhang H, Plutzky J, Skentzos S, Morrison F, Mar P, Shubina M, Turchin A. Discontinuation of statins in routine care settings: a cohort study. *Ann Intern Med*. 2013;158(7):526-34.

## METHODS

- Systematic reviews included in our umbrella systematic review of systematic reviews
- Results from our search for Alternate dosage or regimen in statin intolerant individuals
- Google, UpToDate

## APPENDIX

Table 1A: GRADE certainty of evidence for the use of ezetimibe as a monotherapy on MACE

**Treatment:** ezetimibe monotherapy

**Outcome:** MACE

| Study design | No. studies (no. patients) | Risk of bias                                         | Inconsistency | Indirectness                                       | Imprecision | Publication bias | Effect estimate               | Overall certainty                                                                                                        |
|--------------|----------------------------|------------------------------------------------------|---------------|----------------------------------------------------|-------------|------------------|-------------------------------|--------------------------------------------------------------------------------------------------------------------------|
| RCT          | 1 (3,796)                  | Very serious<br><br>Open-label; important loss to FU | Not serious   | Serious<br><br>Only Japanese adults aged ≥75 years | Not serious | Undetected       | HR 0.66 (95% CI 0.50 to 0.86) | Very low<br><br>This outcome had one serious (-1) and one very serious (-2) therefore <b>downgrade by 3 to very low.</b> |

CI = confidence interval; FU = follow-up; GRADE = Grading of Recommendations, Assessment, Development, and Evaluations; HR = hazard ratio; MACE = major adverse cardiovascular events; RCT = randomized controlled trial

Table 1B: GRADE certainty of evidence for the use of fibrates as a monotherapy on MACE

**Treatment:** fibrate monotherapy

**Outcome:** MACE

| Study design | No. studies (no. patients) | Risk of bias | Inconsistency | Indirectness                                             | Imprecision | Publication bias | Effect estimate               | Overall certainty                                           |
|--------------|----------------------------|--------------|---------------|----------------------------------------------------------|-------------|------------------|-------------------------------|-------------------------------------------------------------|
| RCT          | 4 (12,153)                 | Not serious  | Not serious   | Serious<br><br>Not studied in statin-intolerant subgroup | Not serious | Undetected       | RR 0.79 (95% CI 0.68 to 0.92) | Moderate<br><br>This outcome had one serious (-1) therefore |

| Study design | No. studies (no. patients) | Risk of bias | Inconsistency | Indirectness | Imprecision | Publication bias | Effect estimate | Overall certainty                  |
|--------------|----------------------------|--------------|---------------|--------------|-------------|------------------|-----------------|------------------------------------|
|              |                            |              |               |              |             |                  |                 | <b>downgrade by 1 to moderate.</b> |

CI = confidence interval; GRADE = Grading of Recommendations, Assessment, Development, and Evaluations; MACE = major adverse cardiovascular events; RCT = randomized controlled trial; RR = risk ratio

*Table 1C: GRADE certainty of evidence for the use of niacin as a monotherapy on MACE*

**Treatment:** niacin monotherapy

**Outcome:** MACE

| Study design | No. studies (no. patients) | Risk of bias | Inconsistency                      | Indirectness | Imprecision | Publication bias | Effect estimate                  | Overall certainty                                                                              |
|--------------|----------------------------|--------------|------------------------------------|--------------|-------------|------------------|----------------------------------|------------------------------------------------------------------------------------------------|
| RCT          | 9 (5,375)                  | Not serious  | Serious<br><br>Results vary widely | Not serious  | Not serious | Undetected       | RR 0.81<br>(95% CI 0.66 to 1.00) | Moderate<br><br>This outcome had one serious (-1) therefore <b>downgrade by 1 to moderate.</b> |

CI = confidence interval; GRADE = Grading of Recommendations, Assessment, Development, and Evaluations; MACE = major adverse cardiovascular events; RCT = randomized controlled trial; RR = risk ratio

*Table 1D: GRADE certainty of evidence for the use of icosapent ethyl as a monotherapy on MACE*

**Treatment:** icosapent ethyl

**Outcome:** MACE



| Study design | No. studies (no. patients) | Risk of bias                         | Inconsistency | Indirectness                                                                                       | Imprecision | Publication bias | Effect estimate                                                 | Overall certainty                                                                                                        |
|--------------|----------------------------|--------------------------------------|---------------|----------------------------------------------------------------------------------------------------|-------------|------------------|-----------------------------------------------------------------|--------------------------------------------------------------------------------------------------------------------------|
| RCT          | 2 (8,179-18,645)           | Serious<br><br>One trial not blinded | Not serious   | Very serious<br><br>Treatment combined with statin and not studied in a statin-intolerant subgroup | Not serious | Undetected       | HR 0.74 (95% CI 0.65 to 0.83);<br>HR 0.81 (95% CI 0.69 to 0.95) | Very low<br><br>This outcome had one serious (-1) and one very serious (-2) therefore <b>downgrade by 3 to very low.</b> |

CI = confidence interval; GRADE = Grading of Recommendations, Assessment, Development, and Evaluations; HR = hazard ratio; MACE = major adverse cardiovascular events; RCT = randomized controlled trial

*Table 1E: GRADE certainty of evidence for the use of PCSK9 inhibitors as a monotherapy on MACE*

**Treatment:** PCSK9 inhibitor monotherapy

**Outcome:** MACE

| Study design | No. studies (no. patients) | Risk of bias | Inconsistency | Indirectness                                                                                       | Imprecision | Publication bias | Effect estimate (range) | Overall certainty                                                                         |
|--------------|----------------------------|--------------|---------------|----------------------------------------------------------------------------------------------------|-------------|------------------|-------------------------|-------------------------------------------------------------------------------------------|
| SR           | 16* (24,803-92,736)        | Not serious  | Not serious   | Very serious<br><br>Treatment combined with statin and not studied in a statin-intolerant subgroup | Not serious | Undetected       | RR 0.80-0.89            | Low<br><br>This outcome had one very serious (-2) therefore <b>downgrade by 2 to low.</b> |

\*14 with usable data.

MACE = major adverse cardiovascular events; GRADE = Grading of Recommendations, Assessment, Development, and Evaluations; PCSK9 = proprotein convertase subtilisin/kexin type 9; RR = risk ratio; SR = systematic review

*Table 2: Summary of recommendations from major guidelines published within the past 5 years*

| <b>Our question</b>                                                                                                            | <b>2018 AHA<sup>1</sup></b>                                                                                                                                                                                                                                                                                                                               | <b>2019 ESC Dyslipidemia<sup>2</sup></b>                                                                                                                                                                                                                                                                                                                                                                                                                                                                                                                                                                                                      | <b>2020 VA<sup>3</sup></b>                                                                                                                                                                                                                                                                                                                                                                                                                                                                                                                                                                                                                                                                                                                                                | <b>2021 CCS<sup>4</sup></b>                                                                                                                                                                                                                                    | <b>2021 ESC CVD Prevention<sup>5</sup></b>                                                                         | <b>2022 USPSTF<sup>6</sup></b> |
|--------------------------------------------------------------------------------------------------------------------------------|-----------------------------------------------------------------------------------------------------------------------------------------------------------------------------------------------------------------------------------------------------------------------------------------------------------------------------------------------------------|-----------------------------------------------------------------------------------------------------------------------------------------------------------------------------------------------------------------------------------------------------------------------------------------------------------------------------------------------------------------------------------------------------------------------------------------------------------------------------------------------------------------------------------------------------------------------------------------------------------------------------------------------|---------------------------------------------------------------------------------------------------------------------------------------------------------------------------------------------------------------------------------------------------------------------------------------------------------------------------------------------------------------------------------------------------------------------------------------------------------------------------------------------------------------------------------------------------------------------------------------------------------------------------------------------------------------------------------------------------------------------------------------------------------------------------|----------------------------------------------------------------------------------------------------------------------------------------------------------------------------------------------------------------------------------------------------------------|--------------------------------------------------------------------------------------------------------------------|--------------------------------|
| In patients intolerant of statins, do any lipid-lowering drugs lower the risk of cardiovascular disease compared to no statin? | Severe statin-associated side effects are rare, and recurrent SAMS are infrequent when a thorough reassessment and management strategy of reassess, and rechallenge is used. In patients at increased ASCVD risk with severe statin-associated side effects or recurrent SAMS, nonstatin therapy should be considered when there is net clinical benefit. | In patients at very-high risk, with persistent high LDL-C despite treatment with maximal tolerated statin dose, in combination with ezetimibe or in patients with statin intolerance, a PCSK9 inhibitor may be considered. If the LDL-C target is not reached with the highest tolerated statin dose and/or ezetimibe, PCSK9 inhibitors may be considered on top of lipid-lowering therapy; or alone or in combination with ezetimibe in statin-intolerant patients or in whom a statin is contraindicated. In patients with confirmed statin intolerance or in patients in whom a statin is contraindicated, ezetimibe should be considered. | Most discontinuation of statin therapy is attributed to presumed statin myopathy. While many patients tolerate the same statin when re-challenged, some are reluctant to resume the same or different statin they presume caused the myalgias, leaving limited evidence-based medication options for primary prevention of CVD in patients who cannot take statins. There is a need for clinical trials of alternative lipid-lowering agents for CVD risk reduction in primary prevention populations. Current medications suitable for study would be ezetimibe, PCSK9 inhibitors, bempedoic acid, and icosapent ethyl. Because of the low cost of generic ezetimibe, studies of ezetimibe monotherapy for primary prevention would offer the highest potential benefit. | Although ezetimibe or a PCSK9 inhibitor are reasonable options as monotherapy in patients with complete statin intolerance for LDL-C lowering, there is limited evidence to support either class as an alternative to statin therapy for ASCVD risk reduction. | If a statin-based regimen is not tolerated at any dosage (even after rechallenge), ezetimibe should be considered. | NR                             |

<sup>1</sup>Grundy 2018; <sup>2</sup>Mach 2020; <sup>3</sup>Management of Dyslipidemia for Cardiovascular Risk Reduction Work Group 2020; <sup>4</sup>Pearson 2021; <sup>5</sup>Visseren 2021; <sup>6</sup>US Preventive Services Task Force 2022

ASCVD = atherosclerotic cardiovascular disease; CVD = cardiovascular disease; LDL-C = low-density lipoprotein-cholesterol; NR = not reported; PCSK9 = proprotein convertase subtilisin/kexin type 9; SAMS = statin-associated muscle symptoms

## **CHAPTER 9: LIPID TESTING FREQUENCY**

### **CLINICAL QUESTION**

For patients without cardiovascular disease who are not taking lipid-lowering therapy, does repeating lipid testing as part of cardiovascular disease risk estimation every 5-10 years meaningfully change risk estimates compared to more frequent testing?

### **BOTTOM LINE**

The analytic and biologic variation from a single TC (total cholesterol)/LDL (low-density lipoprotein)/HDL (high-density lipoprotein) in an individual person (10-20%) is much greater than the change in these measurements that occurs over time (<1%/year) in an individual person. Given this measurement variation in individual patients and the relatively minimal impact TC/LDL/HDL changes over time have on cardiovascular disease (CVD) risk estimates, repeat measurements add little if anything to CVD risk estimates.

### **EVIDENCE**

GRADE certainty of evidence evaluation can be found in *Table 1*.

- As with our 2015 guideline we searched evidence specifically addressing changes in TC/LDL/HDL levels over time through citation tracking from a key 2008 paper that studied the implications of different approaches to monitoring lipid levels (**Glasziou 2008**)
- In addition, we reviewed evidence around the analytic and biologic variation of single TC/LDL/HDL measurements (**McCormack 2020**) and used a CVD risk estimation calculator to make ballpark estimates of how much a change in TC/HDL cholesterol on 10-year CVD risk estimates compared to what change occurs simply due to aging
  - We then applied that evidence to scenarios of CVD risk estimations

#### *Measurement variation and TC/LDL/HDL changes over time*

- In people over age 30, the average yearly change in TC/LDL/HDL is  $\leq 1\%$  (**Bakx 2000**). So over 10 years, lipids would in most cases change <10%. The confidence interval (considering both analytic and biologic variation) around a single measurement of TC/LDL/HDL is 10-20% and 30-40% for triglycerides (**McCormack 2020**). Certainly over 5 years, any real change in a person's lipid values over that time frame could not be reliably picked up given this measurement variability. Even at 10 years, much of any lipid change could simply be due to this variability.
- Even if we could pick up a change in lipids over time, we need to put the impact that those changes in lipids would have on absolute CVD risk estimates in context with what an increase in age does to CVD risk. The following is an example of the impact age changes and TC/HDL changes have on an intermediate (15% ten-year risk) CVD risk patient (*Figure 1*). Other specific examples are provided in the appendix at the end of this document (*Figure 2*).

*Figure 1: Example of the impact of changes in TC/HDL on 10-year cardiovascular risk estimates*

50 y/o male, Diabetic, Non-smoker, Systolic BP 130 mmHg, Total cholesterol 4.4 mmol/L (170 mg/dL), HDL 1 (40)

| RISK FACTOR # CHANGES       | Estimated 10-year risk* | Estimated absolute benefit from a statin ** |
|-----------------------------|-------------------------|---------------------------------------------|
| Baseline at 50 y/o          | 15%                     | 3.8%                                        |
| ↑10 years in age            | 25%                     | 6.3%                                        |
| 10 years +<br>2%/yr ↑TC/HDL | 26%<br>30% if just TC↑  | 6.5%<br>7.5%                                |

\* Framingham - [cvdcalculator.com](http://cvdcalculator.com)

\*\* Assuming ~25% ↓ in relative risk

BP = blood pressure; HDL = high-density lipoprotein; TC = total cholesterol

- Over 10 years, age increases the absolute CVD risk estimate from ~15% to 25%. If TC/HDL goes up even 2%/year over that time, the impact that has on absolute CVD risk is pretty much negligible (at most 4% additional absolute risk – in most patients it is less than this) compared to the impact of age.

## CONTEXT

### Major guideline recommendations

Recent guidelines (2018-2022) recommend that lipids be re-measured every 5 years (**Grundy 2019; Pearson 2021; Visseren 2021**). One guideline recommended every 10 years (**Management of Dyslipidemia for Cardiovascular Risk Reduction Work Group 2020**). Two guidelines do not mention a time frame (**Mach 2020; US Preventive Services Task Force 2022**). However, none of these guidelines provide any rationale for this time frame nor discuss measurement variation issues associated with serial lipid measurements. A summary of recommendations published by major guidelines in the past 5 years can be found in *Table 2*.

## REFERENCES

- Arnett DK, Blumenthal RS, Albert MA, Buroker AB, Goldberger ZD, Hahn EJ, et al. 2019 ACC/AHA guideline on the primary prevention of cardiovascular disease. *Circulation*. 2019;140(11):e596–646.
- Bakx JC, Hoogen HJM van den, Deurenberg P, Doremalen J van, van den Bosch WJHM. Changes in serum total cholesterol levels over 18 years in a cohort of men and women: the Nijmegen cohort study. *Prev Med*. 2000;30(2):138–45.
- Glasziou PP, Irwig L, Heritier S, Simes RJ, Tonkin A, Investigators LS. Monitoring cholesterol levels: measurement error or true change? *Ann Intern Med*. 2008;148(9):656.
- Grundy SM, Stone NJ, Bailey AL, Beam C, Birtcher KK, Blumenthal RS, et al. 2018 AHA/ACC/AACVPR/AAPA/ABC/ACPM/ADA/AGS/APhA/ASPC/NLA/PCNA guideline on the management of blood cholesterol. *Circulation*. 2019;139(25):e1082–143.

- Mach F, Baigent C, Catapano AL, Koskinas KC, Casula M, Badimon L et al. 2019 ESC/EAS Guidelines for the management of dyslipidaemias: lipid modification to reduce cardiovascular risk. *Eur Heart J.* 2020;41(1):111-188. doi: 10.1093/eurheartj/ehz455.
- The Management of Dyslipidemia for Cardiovascular Risk Reduction Work Group. VA/DoD clinical practice guideline for the management of dyslipidemia for cardiovascular risk reduction. US Department of Veterans Affairs, Department of Defense. 2020. 127 p.
- McCormack JP, Holmes DT. Your results may vary: the imprecision of medical measurements. *BMJ.* 2020;368:m149.
- Pearson GJ, Thanassoulis G, Anderson TJ, Barry AR, Couture P, Dayan N, et al. 2021 Canadian Cardiovascular Society guidelines for the management of dyslipidemia for the prevention of cardiovascular disease in the adult. *Can J Cardiol.* 2021;37(8):1129–50.
- US Preventive Services Task Force. Statin use for the primary prevention of cardiovascular disease in adults US Preventive Services Task Force recommendation statement. *JAMA.* 2022;328(8):746-753. doi:10.1001/jama.2022.13044
- Visseren FL, Mach F, Smulders YM, Carballo D, Koskinas KC, Bäck M et al. ESC Guidelines on cardiovascular disease prevention in clinical practice: Developed by the Task Force for cardiovascular disease prevention in clinical practice with representatives of the European Society of Cardiology and 12 medical societies With the special contribution of the European Association of Preventive Cardiology (EAPC). *Eur Heart J.* 2021;42(34):3227-337.

## METHODS

- Identified two key papers:
  - As with our 2015 guideline we searched evidence specifically addressing changes in TC/LDL/HDL levels over time through citation tracking from a key 2008 paper that studied the implications of different approaches to monitoring lipid levels **(Glasziou 2008)**
  - Identified key paper addressing evidence around the analytic and biologic variation of single TC/LDL/HDL measurements **(McCormack 2020)**
- Similar article searches using the 2 key articles **(Glasziou 2008; McCormack 2020)** on PubMed database
  - No additional articles found

## APPENDIX

*Figure 2: Impact of changes in cholesterol on 10-year cardiovascular risk estimates*

| ACC/AHA                                                                                  | Baseline 10-year risk (%) | Fatal and non-fatal heart attacks/stroke | After 5 years (%) latest (TC/HDL) | After 10 years (%) latest (TC/HDL) | Framingham                                                                               | Baseline 10-year risk (%) | Fatal and non-fatal heart attacks/stroke, heart failure, angina, intermittent | After 5 years (%) latest (TC/HDL) | After 10 years (%) latest (TC/HDL) |
|------------------------------------------------------------------------------------------|---------------------------|------------------------------------------|-----------------------------------|------------------------------------|------------------------------------------------------------------------------------------|---------------------------|-------------------------------------------------------------------------------|-----------------------------------|------------------------------------|
| <b>FEMALE</b><br>50 y/o, non smoker, SBP 130, baseline TC 4, HDL 1                       | 1.4                       | Age but no change in cholesterol         | 2.1 (4/1)                         | 3.5 (4/1)                          | <b>FEMALE</b><br>50 y/o, non smoker, SBP 130, baseline TC 4, HDL 1                       | 4.3                       | Age but no change in cholesterol                                              | 5.4 (4/1)                         | 6.5 (4/1)                          |
|                                                                                          |                           | Cholesterol 1%/year ↑                    | 2.1 (4.2/1.1)                     | 3.6 (4.4/1.1)                      |                                                                                          |                           | Cholesterol 1%/year ↑                                                         | 5.7 (4.2/1.1)                     | 7.0 (4.4/1.1)                      |
|                                                                                          |                           | Cholesterol 2%/year ↑                    | 2.2 (4.4/1.1)                     | 3.6 (4.8/1.2)                      |                                                                                          |                           | Cholesterol 2%/year ↑                                                         | 5.9 (4.4/1.1)                     | 7.2 (4.8/1.2)                      |
| <b>MALE</b><br>50 y/o, non smoker, SBP 130, baseline TC 4, HDL 1                         | 3.2                       | Age but no change in cholesterol         | 5.3 (4/1)                         | 8.3 (4/1)                          | <b>MALE</b><br>50 y/o, non smoker, SBP 130, baseline TC 4, HDL 1                         | 7.9                       | Age but no change in cholesterol                                              | 10.4 (4/1)                        | 13.4 (4/1)                         |
|                                                                                          |                           | Cholesterol 1%/year ↑                    | 5.3 (4.2/1.1)                     | 8.6 (4.4/1.1)                      |                                                                                          |                           | Cholesterol 1%/year ↑                                                         | 10.3 (4.2/1.1)                    | 13.9 (4.4/1.1)                     |
|                                                                                          |                           | Cholesterol 2%/year ↑                    | 5.6 (4.4/1.1)                     | 8.7 (4.8/1.2)                      |                                                                                          |                           | Cholesterol 2%/year ↑                                                         | 10.9 (4.4/1.1)                    | 14.1 (4.8/1.2)                     |
| <b>MALE</b><br><b>DIABETIC</b><br>50 y/o male, non smoker, SBP 130, baseline TC 4, HDL 1 | 6.1                       | Age but no change in cholesterol         | 10.0 (4/1)                        | 15.5 (4/1)                         | <b>MALE</b><br><b>DIABETIC</b><br>50 y/o male, non smoker, SBP 130, baseline TC 4, HDL 1 | 13.6                      | Age but no change in cholesterol                                              | 17.8 (4/1)                        | 22.6 (4/1)                         |
|                                                                                          |                           | Cholesterol 1%/year ↑                    | 9.9 (4.2/1.1)                     | 16.0 (4.4/1.1)                     |                                                                                          |                           | Cholesterol 1%/year ↑                                                         | 17.6 (4.2/1.1)                    | 23.4 (4.4/1.1)                     |
|                                                                                          |                           | Cholesterol 2%/year ↑                    | 10.4 (4.4/1.1)                    | 16.2 (4.8/1.2)                     |                                                                                          |                           | Cholesterol 2%/year ↑                                                         | 18.5 (4.4/1.1)                    | 23.6 (4.8/1.2)                     |
|                                                                                          |                           | Cholesterol 4%/year ↑                    | 10.6 (4.8/1.2)                    | 16.6 (5.6/1.4)                     |                                                                                          |                           | Cholesterol 4%/year ↑                                                         | 18.6 (4.8/1.2)                    | 24.1 (5.6/1.4)                     |

This table shows the changes in risk that accompany changes in TC/HDL over time.

ACC = American College of Cardiology; AHA = American Heart Association; HDL = high-density lipoprotein; SBP = systolic blood pressure; TC = total cholesterol

*Table 1: GRADE certainty of evidence for lipid variability over years*

**Outcome:** cholesterol variability over years

| Study design | No. studies (no. patients) | Risk of bias | Inconsistency | Indirectness | Imprecision | Publication bias | Large effect | Plausible confounding | Dose-response gradient | Effect estimate                                  | Certainty                              |
|--------------|----------------------------|--------------|---------------|--------------|-------------|------------------|--------------|-----------------------|------------------------|--------------------------------------------------|----------------------------------------|
| Cohort       | 1 (2,325)                  | Not serious  | Not serious   | Not serious  | Not serious | Not detected     | No*          | No                    | No                     | Change in cholesterol of ~10-15% or <1% per year | High<br>This outcome has no downgrades |

\*The question can't be answered with relative risks. Total cholesterol changed over an 18-year period between 0% and 20% depending on age and sex. The mean effect was a change in cholesterol of ~10-15% or <1% per year.

GRADE = Grading of Recommendations, Assessment, Development, and Evaluations

***Table 2: Summary of recommendations from major guidelines published within the past 5 years***

| Our question                                                                                                                                                                                                           | 2018 AHA <sup>1</sup>         | 2019 ESC Dyslipidemia <sup>2</sup> | 2020 VA <sup>3</sup>                      | 2021 CCS <sup>4</sup>       | 2021 ESC CVD Prevention <sup>5</sup>                                              | 2022 USPSTF <sup>6</sup> |
|------------------------------------------------------------------------------------------------------------------------------------------------------------------------------------------------------------------------|-------------------------------|------------------------------------|-------------------------------------------|-----------------------------|-----------------------------------------------------------------------------------|--------------------------|
| For patients without CVD who are not taking lipid-lowering therapy, does repeating lipid testing as part of CVD risk estimation every 5-10 years meaningfully change risk estimates compared to more frequent testing? | Retest lipids every 4-6 years | NR                                 | Retest lipids no more than every 10 years | Retest lipids every 5 years | Retest lipids after 5 years (or sooner if risk was close to treatment thresholds) | NR                       |

<sup>1</sup>Grundy 2018; <sup>2</sup>Mach 2020; <sup>3</sup>Management of Dyslipidemia for Cardiovascular Risk Reduction Work Group 2020; <sup>4</sup>Pearson 2021; <sup>5</sup>Visseren 2021; <sup>6</sup>US Preventive Services Task Force 2022

CVD = cardiovascular disease; NR = not reported



## **CHAPTER 10: LIPID TARGETS**

### **CLINICAL QUESTION**

In patients with/at risk of cardiovascular disease, does attainment of specific low-density lipoprotein, apolipoprotein B, or non-high-density lipoprotein levels decrease the risk of cardiovascular disease compared to use of statins without achieving specific targets?

### **BOTTOM LINE**

At present, the best available evidence does not, and may never be able to, definitively prove whether targeting treatment to low-density lipoprotein (LDL) or simply using/adding medications that have been shown to reduce the risk of cardiovascular disease (CVD) is best. Most clinical trials have used fixed dose (mostly moderate intensity) statins based on CVD risk and find benefit occurs irrespective of LDL levels achieved. In addition, lipid measurement variation (analytic and biologic) of 10-20% with repeated measurements in individual patients makes it difficult to assess if changes seen are due to the treatment or simply due to measurement variation. Other downsides of repeat measurements include the costs of testing, the inconvenience to the patient, and the frustration of patients as many will not reach proposed LDL targets.

In the absence of clear evidence that one approach is better than the other and the additional limitations to clinical application, our suggested approach is to not use routine monitoring of lipid levels to guide future therapy in patients taking statins. Rather, a more rational and simplified approach is to have clinicians focus on the discussion of the benefits and harms of proven therapies for individual patients. As in the case of the initial decision to initiate a statin, the decision of whether to intensify therapy or add additional agents should involve informed shared decision-making through the discussion of individual estimates of potential benefits and harms and link this with patient preferences and values.

### **EVIDENCE**

#### **Treat to Stroke Target RCT (Amarengo 2020)**

- The only RCT that directly compares lower versus higher LDL targets
  - LDL target approach
  - Patients with previous strokes were randomized to an LDL of <1.8 mmol/L or 2.3-2.8 mmol/L
    - Major adverse cardiovascular events (MACE) 2.4% lower (22% relative) over the 3.5 years of follow-up in the lower target arm
  - This trial has been used to support treating to a target LDL of <1.8 in secondary prevention (in this case, post-stroke)
- *Limitations*
  - Trial methodology does not really answer the question of whether a target LDL approach leads to better cardiovascular (CV) outcomes than treatment with a fixed-dose strategy; rather, it answers the question: does adding medications that have been shown to reduce CVD outcomes lead to a reduction in CVD outcomes?

- The trial design led to a greater number of people (53% versus 14%) in the lower LDL target group receiving higher statin doses or the addition of ezetimibe
  - Medication intensification (higher doses or additional agents) in the majority of RCT and meta-analysis evidence of statin and non-statin agents without LDL target goals have found that the use of higher intensity statins or the addition of ezetimibe (i.e., treatment intensification) adds an additional ~5-15% relative reduction in CV events (*Table 1*) (**Management of Dyslipidemia 2020**)
  - This suggests a similar difference in outcomes could have been achieved by simply adding proven treatments rather than targeting a specific LDL target goal
- Absolute risk reduction (ARR) seen for the MACE outcome of 0.69% per year in favor of the lower vs the higher LDL target in this RCT is similar to that seen in a secondary prevention meta-analysis (0.5% per year for more- vs less-intensive statins irrespective of targets) (**Koskinas 2018**)
- Ultimately, while this RCT was designed as a trial of LDL target comparisons, it really presents as a trial of intensification of treatment with similar ARR findings to those of the previous meta-analyses of comparative medication intensification

***Table 1: Lipid lowering and CVD reduction by intensification approach\****

| <b>Intensification approach</b>       | <b>Comparison†</b>                                 | <b>LDL lowering (%)</b> | <b>MACE RRR (%)</b> |
|---------------------------------------|----------------------------------------------------|-------------------------|---------------------|
| Low-medium dose statin                | Statin 10-20mg vs. placebo                         | 35-40%                  | 25%                 |
| Increased statin dose                 | Statin 10-20mg vs. statin 80mg                     | 15-20%                  | 12%                 |
| Add ezetimibe                         | Statin 20mg + ezetimibe vs. statin 20mg alone      | 15-20%                  | 6%                  |
| Add PCSK9i (alirocumab or evolocumab) | Statin >20-40mg + PCSK9i vs. statin >20-40mg alone | 55-70%                  | 15%                 |

\*Afilalo 2007; Cannon 2006; Cannon 2015; Taylor 2013; Koskinas 2018; Sabatine 2017; Schwartz 2018; Zhan 2018

†Statin dose is approximate atorvastatin equivalent

LDL = low-density lipoprotein; MACE = major adverse cardiovascular events; PCSK9i = proprotein convertase subtilisin/kexin type 9 inhibitors; RRR = relative risk reduction

### Primary prevention

- In primary prevention, large RCTs have been performed typically using moderate intensity statins without intensification (**Colhoun 2004; Downs 1998; Nakamura 2006; Sever 2003; Shepherd 1995; Yusuf 2016**)
- Although LDL targets were not the comparison in question in these RCTs, it is difficult to discern any clear pattern of greater risk reduction with lower end-of-trial LDL levels when plotting coronary heart disease (CHD) risk reduction against achieved LDL (*Figure 1*)

- Overall, primary prevention RCTs showed an ~25-35% relative reduction in CHD events regardless of LDL level.

Figure 1: Primary prevention RCTs using moderate intensity statins (equivalent to ~10mg atorvastatin)

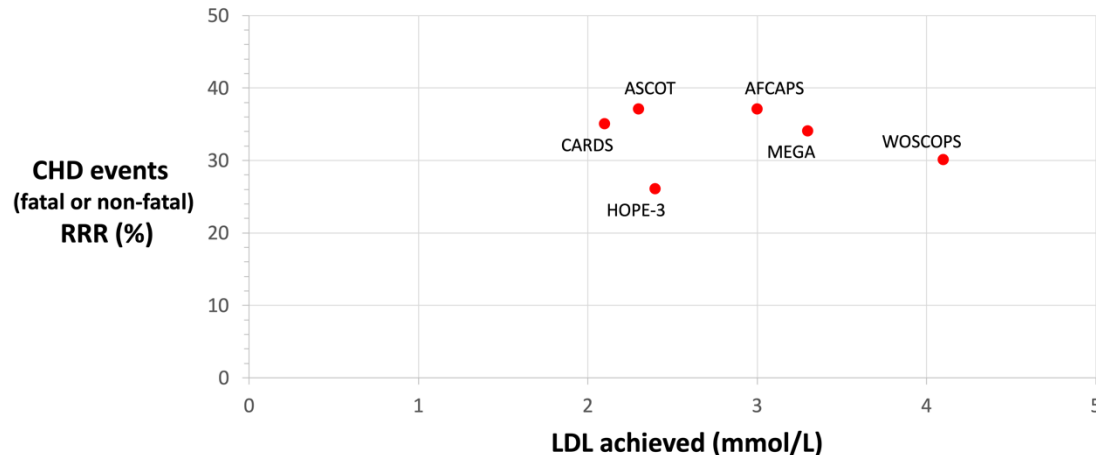

CHD = coronary heart disease; LDL = low-density lipoprotein; RCT = randomized controlled trial; RRR = relative risk reduction

#### Variability in individual lipid measurement

- Another important factor that is often overlooked when it comes to measuring lipids in individual patients is the consideration of lipid lab measurement variation (analytical and biological) when attempting to assess an individual person's lipid level response to medications
  - A 10-20mg dose of a high potency statin (e.g., atorvastatin or rosuvastatin) reduces LDL by ~35-40% and increasing the dose to 40-80mg adds another ~15% reduction in LDL (**Law 2003**)
  - Similarly, the addition of ezetimibe would also reduce LDL by ~15%
  - Unfortunately, the measurement variation for cholesterol values is in the ballpark of 10-20% (**McCormack 2020**)
- When measurement variation is as much if not more than the expected change, serial lipid measurements in individual patients cannot reliably identify whether or not a change in lipid levels has occurred
  - Even if one could somehow identify that a lipid level had gone down, with this amount of measurement variation, one can't know the magnitude of the change with any certainty
  - This is true even if one does multiple measurements before and after an intervention

#### Downsides to serial lipid measurement

- Costs of testing
- Inconvenience to the patient

- High likelihood of not reaching proposed LDL targets leading to frustration for both the clinician and patient
  - The ability to achieve lower LDL targets (e.g., LDL <1.8) has been shown to be challenging for nearly half of clinical trial patients
    - A meta-analysis by Boekholdt, et al (**Boekholdt 2014**) found >40% were not able to reach the target of <1.8 mmol/L, similar to the Treat to Stroke Target findings of 47% of the lower target group being above the 1.8 mmol/L target
    - In several earlier meta-analyses, less than 50% of patients achieved an LDL of <2 mmol/L (**Cholesterol Treatment Trialists' Collaboration 2010; Josan 2008**)
- Paradoxically, if a patient is identified as having reached a target LDL, they then may not be offered the addition of other medications or doses that have been shown to lower CVD
- Focusing on lipid targets may distract from the ultimate goal of getting people to eat healthier food, be more active and if interested, being on medications that have been shown to reduce CVD risk

### Conclusions

- At present, the best available evidence does not, and may never be able to, definitively prove whether targeting treatment to LDL or simply using/adding medications that have been shown to reduce the risk of CVD is best.
  - What has been established with much greater certainty, however, is the incremental reduction in CV risk seen with the incremental addition of either higher doses of statins or of different therapies (ezetimibe/PCSK9 inhibitors) that have been shown to reduce risk in varying degrees in clinical trials, primarily in secondary prevention
- Lower LDL levels have been associated with a lower CV risk (**Cholesterol Treatment Trialists' Collaboration 2019**)
  - However, the lack of evidence that this reduction in CV risk can be directly attributed to an LDL target over simply intensification of therapy suggests that we should focus on the discussion of the benefits and harms of proven therapies for individual patients as a more rational and simplified approach
- Our suggested approach, therefore, is to not use ongoing monitoring of lipid levels to guide future therapy in patients taking statins
  - Rather, as in the case of the initial decision to initiate a statin, the decision to intensify therapy should necessarily involve shared decision-making through the discussion of individual estimates of potential benefit and harm of intensification along with patient preferences and values

## CONTEXT

### Major guideline recommendations

While several recent guidelines recommend treating to a target lipid goal, our review of the available data leads to a similar perspective and conclusion as that taken by the DVA/DoD

**(Management of Dyslipidemia for Cardiovascular Risk Reduction Work Group 2020)**. And, while the USPSTF (**US Preventive Services Task Force 2022**) does not provide a formal recommendation on this question, the absence of a recommendation, their statement that moderate-intensity statins are reasonable for most primary prevention patients, and their acknowledgement of this as a research gap is in keeping with the uncertainty we have presented in our synopsis. In the absence of direct evidence that use of defined LDL targets result in unique CVD benefit for patients, utilizing the simplest approach to care is necessary for individual patients, clinicians, and the healthcare system.

Organizations internationally present two different approaches around the decision to intensify medications for lipidemia management for CVD risk reduction (*Table 2*):

1. Treating to a target goal (either to a specified level or by % reduction) for a defined marker (e.g., LDL), or;
2. Not having a target goal for a defined marker but simply discussing/recommending the use of medications that have been shown in clinical trials to reduce CVD outcomes.

Table 2: Current guideline recommendations

| Guideline                                   | Recommendation                                                                                                                                                                                                                                                                                                                                                                                                                                                                                                                                                                                                                                                                                         | Recommend treat to target approach? |
|---------------------------------------------|--------------------------------------------------------------------------------------------------------------------------------------------------------------------------------------------------------------------------------------------------------------------------------------------------------------------------------------------------------------------------------------------------------------------------------------------------------------------------------------------------------------------------------------------------------------------------------------------------------------------------------------------------------------------------------------------------------|-------------------------------------|
| CCS 2021 <sup>1</sup><br>(Dyslipidemia)     | <ul style="list-style-type: none"> <li>• Primary prevention: If LDL <math>\geq 2</math> or ApoB <math>\geq 0.8</math> or non-HDL <math>&gt; 2.6</math> on maximally tolerated statin dose, discuss add-on therapy (Fig 1) <b>(No formal graded recommendation)</b></li> <li>• Secondary prevention: Recommend intensification of lipid-lowering therapy with ezetimibe and/or PCSK9 inhibitor therapy for all secondary prevention CVD patients in whom LDL-C remains <math>\geq 1.8</math> mmol/L (or non-HDL-C <math>\geq 2.4</math> mmol/L or ApoB <math>\geq 0.7</math> g/L) while receiving the maximally tolerated statin dose. <b>(Strong Recommendation; High-Quality Evidence)</b></li> </ul> | Yes                                 |
| ACC/AHA 2018 <sup>2</sup><br>(Dyslipidemia) | <ul style="list-style-type: none"> <li>• Adherence to changes in lifestyle and effects of LDL-C-lowering medication should be assessed by measurement of fasting lipids and appropriate safety indicators 4 to 12 weeks after statin initiation or dose adjustment and every 3 to 12 months thereafter based on need to assess adherence or safety. <b>(Class I, LOE A)</b></li> <li>• Intermediate risk: Reduce LDL-C by 30-49% for <b>(Class I, no LOE)</b></li> <li>• High risk: Reduce LDL-C by <math>\geq 50\%</math> for <b>(Class I, no LOE)</b></li> </ul>                                                                                                                                     | Yes                                 |
| ESC/EAS 2019 <sup>3</sup><br>(Dyslipidemia) | <ul style="list-style-type: none"> <li>• See Table 3, p120 (“New/revised concepts”) and p132 for the many varied LDL level and % LDL reduction targets depending on risk level <b>(range of Class and LOE grades depending on recommendation)</b></li> </ul>                                                                                                                                                                                                                                                                                                                                                                                                                                           | Yes                                 |
| ESC 2021 <sup>4</sup><br>(CVD prevention)   | <ul style="list-style-type: none"> <li>• Lipid goals are the same as in the 2019 ESC/EAS dyslipidemia guidelines (above) <b>(range of Class and LOE grades depending on recommendation)</b></li> </ul>                                                                                                                                                                                                                                                                                                                                                                                                                                                                                                 | Yes                                 |

| Guideline                                                   | Recommendation                                                                                                                                                                                                                                                                                                                                                                       | Recommend treat to target approach? |
|-------------------------------------------------------------|--------------------------------------------------------------------------------------------------------------------------------------------------------------------------------------------------------------------------------------------------------------------------------------------------------------------------------------------------------------------------------------|-------------------------------------|
| DVA/DoD 2020 <sup>5</sup><br>(Dyslipidemia)                 | <ul style="list-style-type: none"> <li>Suggest against the routine monitoring of lipid levels in patients taking statins. No target recommendation. <b>(Weak Against)</b></li> </ul>                                                                                                                                                                                                 | No                                  |
| USPSTF 2022 <sup>6</sup><br>(Statins in primary prevention) | <ul style="list-style-type: none"> <li><b>No target recommendation</b> (“Research Needs and Gaps: <i>Trials that directly compare statin therapy titrated to target lipid levels vs fixed-dose therapy to inform optimal dosing strategies</i>”)</li> <li>Use of moderate-intensity statin therapy stated as reasonable for the primary prevention of CVD in most persons</li> </ul> | No                                  |

<sup>1</sup>Pearson 2021; <sup>2</sup>Grundy 2018; <sup>3</sup>Mach 2020; <sup>4</sup>Visseren 2021; <sup>5</sup>Management of Dyslipidemia for Cardiovascular Risk Reduction Work Group 2020; <sup>6</sup>US Preventive Services Task Force 2022

ApoB = apolipoprotein B; CVD = cardiovascular disease; HDL = high-density lipoprotein; HDL-C = high-density lipoprotein-cholesterol; LDL = low-density lipoprotein; LDL-C = low-density lipoprotein-cholesterol; LOE; PCSK9 = proprotein convertase subtilisin/kexin type 9

Guidelines that recommend specific LDL/apolipoprotein B (ApoB)/non-HDL (high-density lipoprotein) targets typically suggest these recommendations are Strong or Class 1; however, no randomized controlled trials (RCTs) have directly compared treatment with statins titrated, or non-statin added, to attain target cholesterol levels versus other (e.g., fixed-dose or fixed treatment) treatment strategies (**US Preventive Services Task Force 2022**). Of note, despite the recommendation to use a targeted biomarker approach, the CCS states “no clear target to which LDL-C or non HDL-C or ApoB levels should be lowered is clearly identified in RCTs” (**Pearson 2021**) and the ESC/EAS 2019 states “the Task Force is aware of the limitations of some of the sources of evidence and accepts that RCTs have not examined different LDL-C goals systematically, but felt that it was appropriate to look at the totality of the evidence” (**Mach 2020**).

## REFERENCES

- Afilalo J, Majdan AA, Eisenberg MJ. Intensive statin therapy in acute coronary syndromes and stable coronary heart disease: a comparative meta-analysis of randomised controlled trials. *Heart*. 2007;93:914-921. doi:10.1136/hrt.2006.112508
- Allan GM, Lindblad AJ, Comeau A, Coppola J, Hudson B et al. Simplified lipid guidelines: Prevention and management of cardiovascular disease in primary care. *Can Fam Physician* 2015; 61:857-67
- Amarenco P, Kim, JS, Labreuche J, Charles H, Abtan J, Béjot Y, et al. A comparison of two LDL cholesterol targets after ischemic stroke. *N Engl J Med*. 2020;382:9-19. doi:10.1056/NEJMoa1910355
- Boekholdt SJ, Hovingh GK, Mora S, Arsenault BJ, Amarenco P, Pedersen TR, et al. Very low levels of atherogenic lipoproteins and the risk for cardiovascular events: a meta-analysis of statin trials. *J Am Coll Cardiol*. 2014;64:485-494.

- Cannon CP, Blazing MA, Giugliano RP, McCagg A, White JA, Theroux P, et al. Ezetimibe added to statin therapy after acute coronary syndromes. *N Engl J Med*. 2015;372:2387-2397.
- Cannon CP, Steinberg BA, Murphy SA, Mega JL, Braunwald E. Meta-analysis of cardiovascular outcomes trials comparing intensive versus moderate statin therapy. *J Am Coll Cardiol*. 2006;48:438-445. doi:10.1016/j.jacc.2006.04.070
- Cholesterol Treatment Trialists' (CTT) Collaboration. Efficacy and safety of more intensive lowering of LDL cholesterol: a meta-analysis of data from 170000 participants in 26 randomized trials. *Lancet*. 2010;376(9753):1670-1681.
- Cholesterol Treatment Trialists' (CTT) Collaboration. Efficacy and safety of statin therapy in older people: a meta-analysis of individual participant data from 28 randomised controlled trials. *Lancet*. 2019;393:407-415.
- Colhoun HM, Betteridge DJ, Durrington PN, Hitman GA, Neil HA, Livingstone SJ, et al. Primary prevention of cardiovascular disease with atorvastatin in type 2 diabetes in the Collaborative Atorvastatin Diabetes Study (CARDS): multicentre randomized placebo-controlled trial. *Lancet*. 2004;364(9435):685-696.
- Downs JR, Clearfield M, Weis S, Whitney E, Shapiro DR, Beere PA, et al. Primary prevention of acute coronary events with lovastatin in men and women with average cholesterol levels: results of AFCAPS/TexCAPS. Air Force/Texas Coronary Atherosclerosis Prevention Study. *JAMA*. 1998;279(20):1615-1622.
- Grundy SM, Stone NJ, Bailey AL, Beam C, Birtcher KK, Blumenthal RS, et al. 2018 AHA/ACC/AACVPR/AAPA/ABC/ACPM/ADA/AGS/APhA/ASPC/NLA/PCNA guideline on the management of blood cholesterol: a report of the American College of Cardiology/American Heart Association Task Force on Clinical Practice Guidelines. *Circulation*. 2019;139:e1082-e1143. doi: 10.1161/CIR.0000000000000625
- Josan K, Majumdar SR, McAlister FA. The efficacy and safety of intensive statin therapy: a meta-analysis of randomized trials. *Can Med Assoc J*. 2008;178(5):576-584.
- Koskinas KC, Siontis GCM, Piccolo R, Mavridis D, Räber L, Mach F, et al. Effect of statins and non-statin LDL-lowering medications on cardiovascular outcomes in secondary prevention: a meta-analysis of randomized trials. *Eur Heart J*. 2018;39:1172-1180.
- Law MR, Wald NJ, Rudnicka AR. Quantifying effect of statins on low density lipoprotein cholesterol, ischaemic heart disease, and stroke: systematic review and meta-analysis. *BMJ*. 2003;326:1423-1427.
- The Management of Dyslipidemia for Cardiovascular Risk Reduction Work Group. VA/DoD clinical practice guideline for the management of dyslipidemia for cardiovascular risk reduction. US Department of Veterans Affairs, Department of Defense. 2020. 127 p.
- McCormack JP, Holmes DT. Your results may vary: the imprecision of medical measurements. *BMJ*. 2020;368:m149. doi:10.1136/bmj.m149
- Nakamura H, Arakawa K, Itakura H, Kitabatake A, Goto Y, Toyota T, et al. Primary prevention of cardiovascular disease with pravastatin in Japan (MEGA Study): a prospective randomized controlled trial. *Lancet*. 2006;368(9542):1155-1163.

- Pearson GJ, Thanassoulis G, Anderson TJ, Barry AR, Couture P, Dayan N, et al. 2021 Canadian Cardiovascular Society guidelines for the management of dyslipidemia for the prevention of cardiovascular disease in adults. *Can J Cardiol*. 2021;37:1129-1150.
- Sabatine MS, Giugliano RP, Keech AC, Honarpour N, Wiviott SD, Murphy SA, et al. Evolocumab and clinical outcomes in patients with cardiovascular disease. *N Engl J Med*. 2017;376:1713-1722. doi:10.1056/NEJMoa1615664
- Schwartz GG, Steg PG, Szarek M, Bhatt DL, Bittner VA, Diaz R, et al. ODYSSEY, alirocumab and cardiovascular outcomes after acute coronary syndrome. *N Engl J Med*. 2018;379:2097-2107. doi:10.1056/NEJMoa1801174
- Sever PS, Dahlöf B, Poulter NR, Wedel H, Beevers G, Caulfield M, et al. Prevention of coronary and stroke events with atorvastatin in hypertensive patients who have average or lower-than-average cholesterol concentrations, in the Anglo-Scandinavian Cardiac Outcomes Trial—Lipid Lowering Arm (ASCOT-LLA): a multicenter randomised controlled trial. *Lancet*. 2003;361:1149-1158.
- Shepherd J, Cobbe SM, Ford I, Isles CG, Lorimer AR, Macfarlane PW, et al. Prevention of coronary heart disease with pravastatin in men with hypercholesterolemia. West of Scotland Coronary Prevention Study Group. *N Engl J Med*. 1995;333(20):1301-1307. doi:10.1056/NEJM199511163332001
- Taylor F, Huffman MD, Macedo AF, Moore THM, Burke M, Davey Smith G, et al. Statins for the primary prevention of cardiovascular disease. *Cochrane Database Syst Rev*. 2013;Issue 1. Art. No.: CD004816. doi:10.1002/14651858.CD004816.pub5
- US Preventive Services Task Force. Statin use for the primary prevention of cardiovascular disease in adults US Preventive Services Task Force recommendation statement. *JAMA*. 2022;328(8):746-753. doi:10.1001/jama.2022.13044
- Yusuf S, Bosch J, Dagenais G, Zhu J, Xavier D, Liu L, et al. Cholesterol lowering in intermediate-risk persons without cardiovascular disease. *N Engl J Med*. 2016;374(21):2021-2031. doi:10.1056/NEJMoa1600176
- Visseren FL, Mach F, Smulders YM, Carballo D, Koskinas KC, Bäck M et al. ESC Guidelines on cardiovascular disease prevention in clinical practice: Developed by the Task Force for cardiovascular disease prevention in clinical practice with representatives of the European Society of Cardiology and 12 medical societies With the special contribution of the European Association of Preventive Cardiology (EAPC). *Eur Heart J*. 2021;42(34):3227-337.
- Zhan S, Tang M, Liu F, Xia P, Shu M, Wu X. Ezetimibe for the prevention of cardiovascular disease and all-cause mortality events. *Cochrane Database Syst Rev*. 2018;(11). Art No: CD012502. doi:10.1002/14651858.CD012502.pub2

## METHODS

- Since the US DVA/DoD guidelines performed a complete and thorough systematic review to answer this question in 2019 (**Management of Dyslipidemia 2020**), we reviewed their data without an additional, independent literature search
- Other major guidelines and statements (Canadian Cardiovascular Society, AHA/ACC, European Dyslipidemia, European CVD Prevention, and USPSTF) were reviewed for the evidence they used to support or avoid the use of lipid targets



- References utilized by the above guidelines pertaining to lipid targets were then reviewed
- Reviewed evidence around the analytic and biologic variation of cholesterol
