# Supplementary material
Source: PubMed Central journal article supplement (PMC10575658)
Supplement: Figure_1_PEER_Simplified_Lipid_Guideline_2023.pdf [file Figure_1_PEER_Simplified_Lipid_Guideline_2023.pdf]

# PEER Simplified Lipid Guideline 2023: Summary

Simplified approach

Shared decision making

Reduce unnecessary testing

## Treatment Algorithm

(Excludes familial hypercholesterolemia)

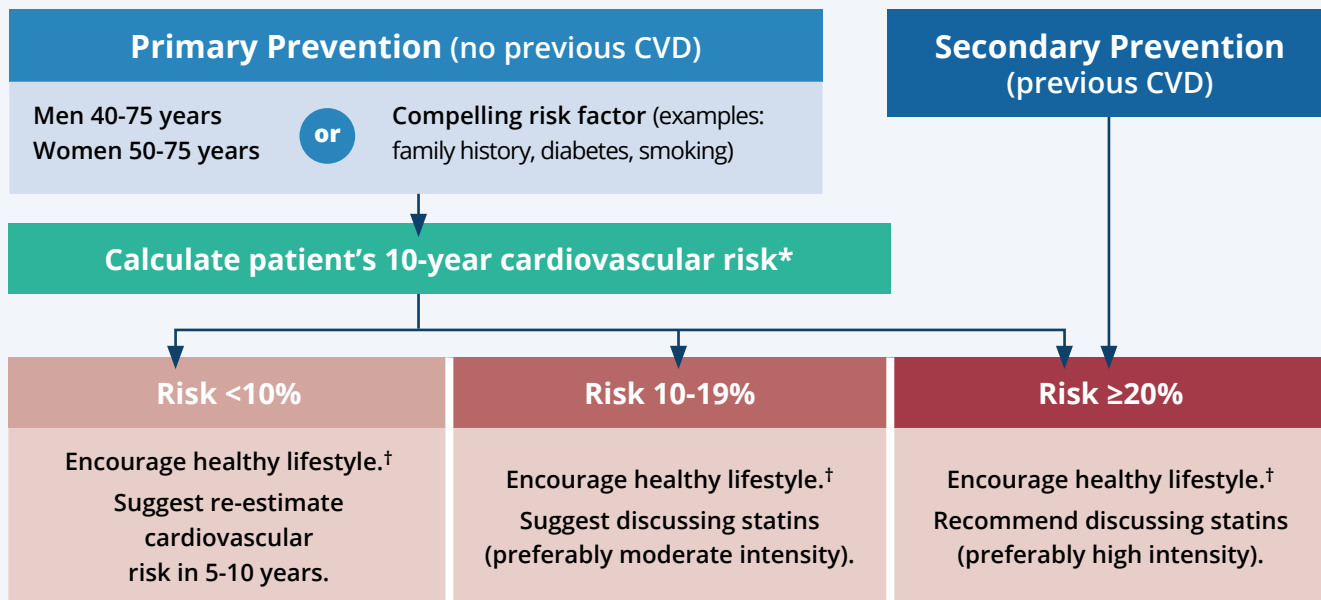

\* Risk levels based on Framingham, the only 10-year calculator validated in Canada.

† Lifestyle includes smoking cessation, physical activity and the Mediterranean diet

CVD = cardiovascular disease

EPA = eicosapentaenoic acid

PCSK9 = proprotein convertase subtilisin-kexin type 9

### Statin Intensity

| Statin (mg)  | Low   | Moderate | High  |
|--------------|-------|----------|-------|
| Atorvastatin | 5     | 10-20    | 40-80 |
| Pravastatin  | 10-20 | 40-80    | -     |
| Rosuvastatin | 2.5   | 5-10     | 20-40 |
| Simvastatin  | 5-10  | 20-40    | -     |

**No**

- Suggest re-estimating cardiovascular risk in 5-10 years, sooner if risk factors change.

**Yes**

- No repeat lipid testing.
- No baseline creatine kinase or alanine transaminase unless clinically indicated.

For secondary prevention, if additional cardiovascular risk reduction is desired beyond maximum statin dose:

- Recommend discussing ezetimibe or PCSK9 inhibitors.
  - Due to adverse events, suggest EPA ethyl ester (icosapent) only after ezetimibe or PCSK9 inhibitor considered.

## Benefit of Statin Therapy

| Sample Patient, CVD Risk over 10 years | Statin Option      | Relative Risk Reduction | Absolute Risk Reduction | New 10 year Risk on Therapy |
|----------------------------------------|--------------------|-------------------------|-------------------------|-----------------------------|
| 20%                                    | Moderate Intensity | 25%                     | 5%                      | 15%                         |
|                                        | High Intensity     | 35%                     | 7%                      | 13%                         |

## Lipid Lowering Agents

| Drug                               | Prescribing Considerations                                                                                                                                                                                                                                            | CVD Relative Risk Reduction | 90-day cost <sup>1</sup> |
|------------------------------------|-----------------------------------------------------------------------------------------------------------------------------------------------------------------------------------------------------------------------------------------------------------------------|-----------------------------|--------------------------|
| <b>Statins</b>                     | <ul style="list-style-type: none"> <li>The only lipid lowering agent that decreases all-cause mortality.</li> <li>Muscle symptoms in first year: 15% versus 14% placebo.</li> <li>Do not worsen cognition or dementia.</li> </ul>                                     | 25-35%                      | \$30-50                  |
| <b>Ezetimibe</b>                   | <ul style="list-style-type: none"> <li>Mostly studied when added to statins in secondary prevention.</li> <li>Well tolerated; 10mg daily.</li> </ul>                                                                                                                  | 7%                          | \$30-45                  |
| <b>PCSK9 inhibitors</b>            | <ul style="list-style-type: none"> <li>Mostly studied when added to statins in secondary prevention.</li> <li>Injection site reactions: 3.5% versus 2.1% placebo.</li> <li>Subcutaneous injections every 2 weeks: alirocumab 75-150mg or evolucumab 140mg.</li> </ul> | ~15%                        | \$1500-2400              |
| <b>Fibrates</b>                    | <ul style="list-style-type: none"> <li>Increase serum creatinine (2-11% more than placebo), pancreatitis (~0.1% more), altered liver function tests (~5% more); example: fenofibrate.</li> </ul>                                                                      | 0-14%*                      | \$60-150                 |
| <b>EPA ethyl ester (icosapent)</b> | <ul style="list-style-type: none"> <li>Mostly studied when added to statins.</li> <li>Atrial fibrillation (5.3% versus 3.9% placebo), serious bleeds (2.7% versus 2.1% placebo); 2g twice daily.</li> </ul>                                                           | ~20%                        | \$1000                   |

\* 0% if added to statins; up to 14% if not on a statin

<sup>1</sup>RxFiles PEER/ACFP Pricing Document

EPA = eicosapentaenoic acid; CVD = cardiovascular disease; PCSK9 = proprotein convertase subtilisin-kexin type 9

## Management of Muscle Symptoms Related to Statins

Out of 100 patients on statins, 15 report muscle symptoms, but only 1 is due to statins

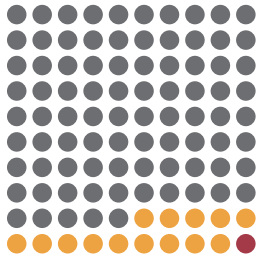

| If a patient does not tolerate a statin, discuss statin rechallenge                                                                                                                       | If a patient is unable to tolerate or unwilling to try a re-challenge                                                                                                                                               |
|-------------------------------------------------------------------------------------------------------------------------------------------------------------------------------------------|---------------------------------------------------------------------------------------------------------------------------------------------------------------------------------------------------------------------|
| <p><b>OPTIONS</b></p> <ul style="list-style-type: none"> <li>Same statin at same dose</li> <li>Lower dose or intensity</li> <li>Different statin</li> <li>Alternate day dosing</li> </ul> | <p><b>Primary prevention</b><br/>Suggest against non-statin lipid lowering therapy</p> <p><b>Secondary prevention</b><br/>Suggest discussing ezetimibe, fibrate, PCSK9 inhibitor or EPA ethyl ester (icosapent)</p> |

## FAQ & Helpful Resources

**Q: Why do PEER guidelines recommend against targeting low-density lipoprotein (LDL) levels?**

A: The vast majority of clinical trials have prescribed fixed statin doses based on CVD risk. Best evidence suggests both strategies (targeting LDL levels or using statins at proven doses) are similarly effective in reducing CVD risk. Targeting cholesterol levels is more complex than use of proven doses. A simplified approach of using proven doses reduces the burden of unnecessary testing for both patients and health professionals. Read more about this issue in the guideline.

**Q: Which cardiovascular decision aid should I use?**

A: There are many cardiovascular risk calculators. The Framingham model has been validated in Canada. [The PEER Cardiovascular Decision Aid](https://decisionaid.ca/cvd/) (https://decisionaid.ca/cvd/), based on Framingham, has been created for this guideline.

**Q: How can I help patients with positive lifestyle changes?**

A: Encourage smoking cessation. Providing [exercise prescription](#) and information about the [Mediterranean diet](#) may be helpful.

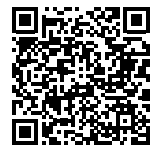

**RXFILES EXERCISE PRESCRIPTION**

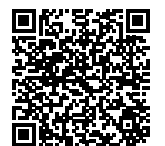

**MEDITERRANEAN DIET**
